# Supplementary material for: Systematic studies on dibenzhydryl and pentiptycenyl substituted pyridine-imine nickel(ii) mediated ethylene polymerization
Source: Royal Society of Chemistry journal article supplement (doi:10.1039/d0dt00505c), 2020-01-01
Supplement: d0dt00505c1.pdf [file d0dt00505c1.pdf]

## Supplementary Information

### Systematic studies on dibenzhydryl and pentiptycenyl substituted pyridine-imine nickel(II) mediated ethylene polymerization

Chaoqun Wang,<sup>a,b</sup> Yuxing Zhang,<sup>a,b</sup> Hongliang Mu,<sup>a,\*</sup> Zhongbao Jian<sup>a,b,\*</sup>

<sup>a</sup> State Key Laboratory of Polymer Physics and Chemistry, Changchun Institute of Applied Chemistry, Chinese Academy of Sciences, Renmin Street 5625, Changchun 130022, China.

<sup>b</sup> University of Science and Technology of China, Hefei 230026, China.

### Contents

|                                                              |     |
|--------------------------------------------------------------|-----|
| 1. General information                                       | S2  |
| 2. Preparation of ligands and catalysts                      | S3  |
| 3. <sup>1</sup> H and <sup>13</sup> C NMR spectra of Ligands | S8  |
| 4. MALDI-TOF-MS of Ni complexes                              | S12 |
| 5. NMR figures of polymers                                   | S14 |
| 6. GPC traces of polymers                                    | S31 |
| 7. Crystallographic data of nickel complexes                 | S54 |
| 8. References                                                | S55 |

## 1. General information

**General Procedures:** All syntheses involving air- and moisture sensitive compounds were carried out using standard Schlenk-type glassware (or in a glove box) under an atmosphere of nitrogen. All solvents were purified from the MBraun SPS system. NMR spectra for the ligands, complexes, and polymers were recorded on a Bruker AV400 ( $^1\text{H}$ : 400 MHz,  $^{13}\text{C}$ : 100 MHz) or a Bruker AV500 ( $^1\text{H}$ : 500 MHz,  $^{13}\text{C}$ : 125 MHz). The molecular weights ( $M_n$ ) and molecular weight distributions ( $M_w/M_n$ ) of polyethylenes were measured by means of gel permeation chromatography (GPC) on a PL-GPC 220-type high-temperature chromatograph equipped with three PL-gel 10  $\mu\text{m}$  Mixed-B LS type columns at 150  $^\circ\text{C}$ . Mass spectra of the complexes were recorded on an Acquity UPLC & Quattro Premier. Elemental analysis were performed at the National Analytical Research Centre of Changchun Institute of Applied Chemistry.

**X-Ray diffraction:** Data collections were performed at  $-100\text{ }^\circ\text{C}$  on a Bruker SMART APEX diffractometer with a CCD area detector, using graphite-monochromated Mo  $K\alpha$  radiation ( $\lambda = 0.71073\text{ \AA}$ ) or Cu  $K\alpha$  radiation ( $\lambda = 1.54178\text{ \AA}$ ). The determination of crystal class and unit cell parameters was carried out by the SMART program package.<sup>1</sup> The raw frame data were processed using SAINT and SADABS to yield the reflection data file.<sup>2</sup> All structures were solved by direct methods and refined by full-matrix least-squares procedures on  $F^2$  using SHELXTL 2014 and Olex 2.<sup>3</sup> Refinement was performed on  $F^2$  anisotropically for all non-hydrogen atoms by the full-matrix least-squares method. The hydrogen atoms were placed at the calculated positions and were included in the structure calculation without further refinement of the parameters.

**Exceptions and special features:** For complex **Ni2**, the program SQUEEZE<sup>4</sup> was used to remove mathematically the effect of the solvent. The quoted formula and derived parameters are not included the squeezed solvent molecules.

**Materials:** 2-acetylpyridine and 2-pyridinecarboxaldehyde were purchased from Saen Chemical Technology (Shanghai) company. 2,6-bis(diphenylmethyl)-4-methoxyaniline<sup>4</sup> and pentiptycene aminophenol<sup>5</sup> were prepared using literature procedures. The ligands **L1/L2/L3/L4** and the corresponding nickel complexes **Ni1/Ni2/Ni3/Ni4** were prepared using literature procedure.<sup>6</sup>

## 2. Preparation of Ligands and Catalysts

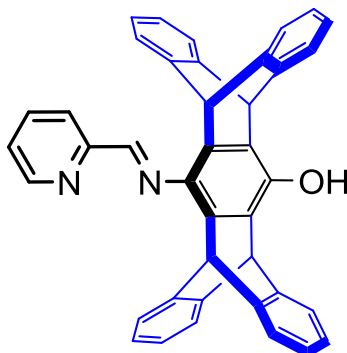

**Synthesis of compound A:** A solution of 2-pyridinecarboxaldehyde (0.93 g, 8.66 mmol), pentiptycene aminophenol (2.00 g, 4.33 mmol) and *p*-toluenesulfonic acid (10 mg) in toluene (50 mL) was refluxed for 24 h, the solvent was evaporated under reduced pressure. The crude product was washed with ethanol, petroleum ether, yielding the product as yellow solid in 44% yield (1.05 g, 1.91 mmol).

**<sup>1</sup>H NMR** (500 MHz, 298 K, DMSO-*d*<sub>6</sub>, 2.50 ppm): δ 9.39 (s, 1H, OH), 8.88 (d, 1H, Py-*H*), 8.56 (d, 1H, Py-*H*), 8.31 (s, 1H, N=CH), 8.15 (t, 1H, Py-*H*), 7.68 (d, 1H, Py-*H*), 7.37 (d, 4H, aryl-*H*), 7.30 (d, 4H, aryl-*H*), 6.93 (m, 8H, aryl-*H*), 5.98 (s, 2H, CHAr<sub>3</sub>), 5.64 (s, 2H, CHAr<sub>3</sub>).

**Elemental analysis:** Anal. Calcd for C<sub>40</sub>H<sub>26</sub>N<sub>2</sub>O: C, 87.25; H, 4.76; N, 5.09. Found: C, 88.12; H, 4.83; N, 5.15.

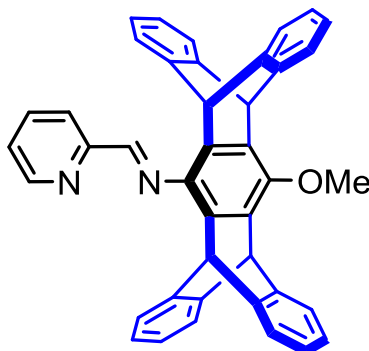

**Preparation of ligand L2:** To the solution of compound A (1.05 g, 1.91 mmol) in DMF (100 mL) at 50 °C was added K<sub>2</sub>CO<sub>3</sub> (1.06 g, 7.64 mmol). The mixture was stirred for 1 min and MeI (0.55 g, 3.87 mmol) was added. The reaction mixture was stirred overnight at 50 °C. The yellow suspension was cooled to room temperature and poured into 300 mL of water, extracted with dichloromethane (3\*20mL). The combined organics were dried over anhydrous Na<sub>2</sub>SO<sub>4</sub> and concentrated. The crude product was washed with petroleum ether, yielding the product as yellow solid in 69.6% yield (0.75 g, 1.3 mmol).

**<sup>1</sup>H NMR** (500 MHz, 298 K, DMSO-*d*<sub>6</sub>, 2.50 ppm): δ 8.89 (d, 1H, Py-*H*), 8.56 (d, 1H, Py-*H*), 8.32 (s, 1H, N=CH), 8.17 (t, 1H, Py-*H*), 7.72 (t, 1H, Py-*H*), 7.44 (d, 4H, aryl-*H*), 7.31 (d, 4H, aryl-*H*), 6.95 (m, 8H, aryl-*H*), 5.82 (s, 2H, CHAr<sub>3</sub>), 5.64 (s, 2H, CHAr<sub>3</sub>), 3.87 (s, 3H, OCH<sub>3</sub>).

**$^{13}\text{C}\{^1\text{H}\}$  NMR** (125 MHz, 298 K,  $\text{CD}_2\text{Cl}_2$ , 53.84 ppm):  $\delta$  166.28 (N=C-py), 155.02, 150.32, 148.19, 145.85, 140.21, 137.14, 136.31, 135.43, 126.06, 125.58, 123.94, 121.96, 63.33 ( $\text{OCH}_3$ ), 49.51 ( $\text{CHPh}_2$ ), 48.45 ( $\text{CHPh}_2$ ).

**Elemental analysis:** Anal. Calcd for  $\text{C}_{41}\text{H}_{28}\text{N}_2\text{O}$ : C, 87.21; H, 5.00; N, 4.96. Found: C, 87.55; H, 5.13; N, 5.02.

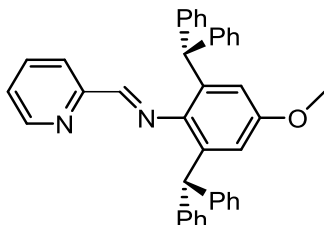

**Preparation of ligand L1:** A mixture of 2,6-bis(diphenylmethyl)-4-methoxyaniline (2 g, 4.39 mmol), 2-pyridinecarboxaldehyde (0.94 g, 8.78 mmol) and *p*-toluenesulfonic acid (10 mg) in toluene (50 mL) was refluxed for 12 h. After cooling down to room temperature, the solution was washed with 1N potassium hydroxide solution, and the aqueous layer was extracted with dichloromethane (3\*20 mL). The combined organic layer was dried over anhydrous  $\text{Na}_2\text{SO}_4$  and concentrated. The crude product was washed with petroleum ether, yielding the target ligand as beige solid in 76% yield (1.82 g, 3.3 mmol).

**$^1\text{H}$  NMR** (500 MHz, 298 K,  $\text{CDCl}_3$ , 7.26 ppm):  $\delta$  = 8.58 (d, 1H, N=CH), 7.68 (t, 1H, aryl-*H*), 7.59 (d, 1H, aryl-*H*), 7.28 (t, 1H, aryl-*H*), 7.13-7.19 (m, 12H, aryl-*H*), 7.01-7.04 (m, 9H, aryl-*H*), 6.41 (s, 2H, aryl-*H*), 5.47 (s, 2H, Ar-CH( $\text{Ph}$ ) $_2$ ), 3.54 (s, 2H,  $\text{OCH}_3$ ).

**$^{13}\text{C}\{^1\text{H}\}$  NMR** (125 MHz, 298 K,  $\text{CD}_2\text{Cl}_2$ , 53.84 ppm):  $\delta$  166.21 (N=C-py), 156.10, 154.41, 149.74, 144.23, 143.93, 136.59, 134.92, 129.91, 128.60, 126.65, 125.44, 121.44, 114.21, 55.41 ( $\text{OCH}_3$ ), 52.38 ( $\text{CHPh}_2$ ).

**Elemental analysis:** Anal. Calcd for  $\text{C}_{39}\text{H}_{32}\text{N}_2\text{O}$ : C, 86.00; H, 5.92; N, 5.14. Found: C, 86.38; H, 5.85; N, 5.04.

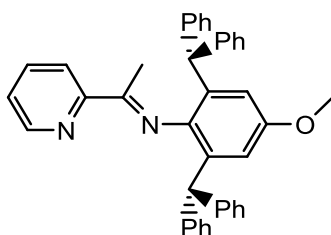

**Preparation of ligand L3:** A solution of 2,6-bis(diphenylmethyl)-4-methoxyaniline (2.00 g, 4.39 mmol), 2-acetylpyridine (0.64 g, 5.30 mmol) and *p*-toluenesulfonic acid (10 mg) in toluene (50 mL) was refluxed for 30 h. After cooling down to room temperature, the solution was washed by 1N potassium hydroxide solution, and the organic layer was separated. The aqueous layer was extracted with dichloromethane (3\*20mL). The combined organics were dried over anhydrous  $\text{Na}_2\text{SO}_4$  and concentrated. The crude product was washed with petroleum ether, yielding the product as yellow solid in 50% yield (1.23 g, 2.2 mmol).

**$^1\text{H}$  NMR** (500 MHz, 298 K,  $\text{CDCl}_3$ , 7.26 ppm):  $\delta$  8.58 (s, 1H, N=CH), 7.99 (d, 1H, Py-*H*), 7.71 (t, 1H, Py-*H*), 7.33 (t, 1H, Py-*H*), 7.20-7.24 (m, 4H, aryl-*H*), 7.12-7.19 (m, 8H, aryl-*H*), 6.99-7.05 (m, 8H, aryl-*H*), 6.46 (s, 2H, aryl-*H*), 5.27 (s, 2H, Ar-CH( $\text{Ph}$ ) $_2$ ), 3.56 (s, 3H,  $\text{OCH}_3$ ), 1.07 (s, 3H, N=C-Me).

**$^{13}\text{C}\{^1\text{H}\}$  NMR** (125 MHz, 298 K,  $\text{CD}_2\text{Cl}_2$ , 53.84 ppm):  $\delta$  170.78 (N=C-py), 155.58, 148.78, 143.80, 142.90, 133.95, 130.08, 129.75, 128.69, 128.60, 128.50, 126.66, 126.57, 125.10, 121.61, 114.41, 55.45 ( $\text{OCH}_3$ ), 52.38 ( $\text{CHPh}_2$ ), 17.18 (N=C-Me).

**Elemental analysis:** Anal. Calcd for  $\text{C}_{40}\text{H}_{34}\text{N}_2\text{O}$ : C, 85.99; H, 6.13; N, 5.01. Found: C, 86.36; H, 6.21; N, 5.08.

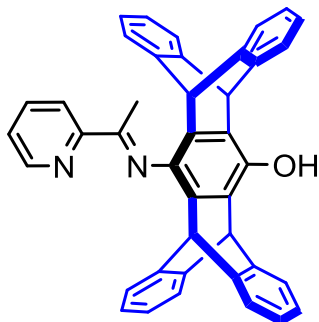

**Synthesis of compound B:** A solution of 2-acetylpyridine (0.63g, 5.20mmol), pentiptycene aminophenol (2.00 g, 4.33 mmol) and *p*-toluenesulfonic acid (10 mg) in toluene (50 mL) was refluxed for 24 h, the solvent was evaporated under reduced pressure. The crude product was washed with ethanol, petroleum ether, yielding the product as beige solid in 75.7% yield (1.85 g, 3.28 mmol).

**$^1\text{H}$  NMR** (400 MHz, 298 K,  $\text{DMSO}-d_6$ , 2.50 ppm):  $\delta$  9.09 (s, 1H, OH), 8.83 (d, 1H, Py-H), 8.56 (d, 1H, Py-H), 8.12 (s, 1H, N=CH), 7.69 (t, 1H, Py-H), 7.36-7.20 (m, 10H, aryl-H), 6.89 (m, 10H, aryl-H), 5.94 (s, 2H,  $\text{CHAr}_3$ ), 5.15 (s, 2H,  $\text{CHAr}_3$ ), 1.92 (s, 3H, N=C-Me).

**Elemental analysis:** Anal. Calcd for  $\text{C}_{41}\text{H}_{28}\text{N}_2\text{O}$ : C, 87.21; H, 5.00; N, 4.96. Found: C, 87.80; H, 4.86; N, 5.01.

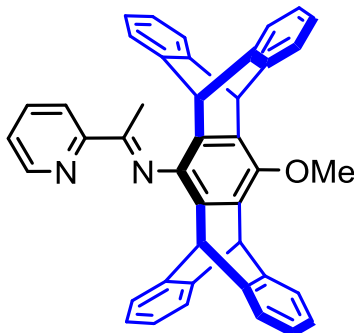

**Preparation of ligand L4:** To the solution of compound **B** (1.40 g, 2.48 mmol) in DMF (100 mL) at 50 °C was added  $\text{K}_2\text{CO}_3$  (1.37 g, 9.92 mmol). The mixture was stirred for 1 min and MeI (0.70 g, 4.96 mmol) was added. The reaction mixture was stirred overnight at 50 °C. The yellow suspension was cooled to room temperature and poured into 300 mL of water, extracted with dichloromethane (3\*20mL). The combined organics were dried over anhydrous  $\text{Na}_2\text{SO}_4$  and concentrated. The crude product was washed with petroleum ether, yielding the product as yellow solid in 76.6% yield (1.10 g, 1.90 mmol).

**$^1\text{H}$  NMR** (500 MHz, 298 K,  $\text{DMSO}-d_6$ , 2.50 ppm):  $\delta$  8.85 (d, 1H, Py-H), 8.54 (d, 1H, Py-H), 8.13 (t, 1H, Py-H), 7.71 (t, 1H, Py-H), 7.43 (d, 4H, aryl-H), 7.27 (d, 4H, aryl-H).

*H*), 6.91 (m, 8H, aryl-*H*), 5.80 (s, 2H, *CHAr*<sub>3</sub>), 5.22 (s, 2H, *CHAr*<sub>3</sub>), 3.87 (s, 3H, *OCH*<sub>3</sub>), 1.95 (s, 3H, *N=C-Me*).

**<sup>13</sup>C{<sup>1</sup>H} NMR** (125 MHz, 298 K, CD<sub>2</sub>Cl<sub>2</sub>, 53.84 ppm): δ 170.94 (*N=C-py*), 156.76, 149.20, 147.06, 146.02, 145.90, 145.66, 138.76, 137.04, 136.12, 132.69, 125.70, 123.99, 123.88, 123.82, 122.07, 63.46 (*OCH*<sub>3</sub>), 49.52 (*CHPh*<sub>2</sub>), 48.55 (*CHPh*<sub>2</sub>), 17.88 (*N=C-Me*).

**Elemental analysis:** Anal. Calcd for C<sub>42</sub>H<sub>30</sub>N<sub>2</sub>O: C, 87.17; H, 5.23; N, 4.84. Found: C, 87.53; H, 5.31; N, 4.94.

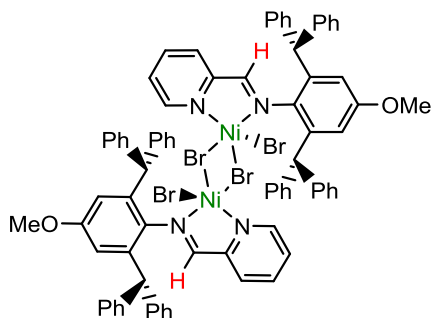

**Preparation of complex Ni1:** A mixture of **L1** (223 mg, 0.409 mmol) and (DME)NiBr<sub>2</sub> (120 mg, 0.389 mmol) was stirred in 25 mL of dichloromethane overnight at room temperature. The solvent was evaporated under reduced pressure, and the desired compound can be isolated by repeated recrystallization from n-hexane and dichloromethane. 230 mg of pure compound was obtained as an orange solid in 77.7% yield.

**MALDI-TOF-MS (*m/z*):** 681.1 [*M-Br*]<sup>+</sup>.

**Elemental analysis:** Anal. Calcd for C<sub>78</sub>H<sub>64</sub>Br<sub>4</sub>N<sub>4</sub>Ni<sub>2</sub>O<sub>2</sub>: C, 61.38; H, 4.23; N, 3.67. Found: C, 61.50; H, 4.53; N, 3.81.

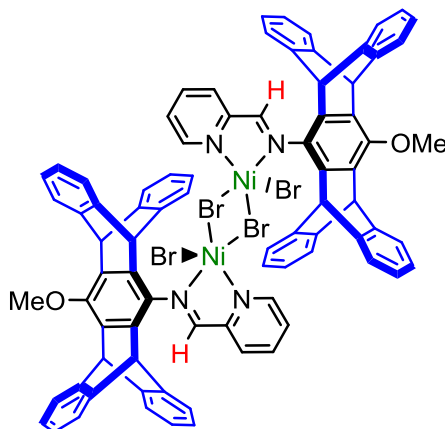

**Preparation of complex Ni2:** A mixture of **L2** (231 mg, 0.409 mmol) and (DME)NiBr<sub>2</sub> (120 mg, 0.389 mmol) (DME = 1,2-dimethoxyethane) were stirred in 25 mL of dichloromethane overnight at room temperature. The solvent was evaporated under reduced pressure, the desired compound can be isolated from repeated recrystallized from n-hexane and dichloromethane. The pure compound was obtained as an orange solid (250mg, 82.1% yield).

**MALDI-TOF-MS (*m/z*):** 701.1 [*M-Br*]<sup>+</sup>.

**Elemental analysis:** Anal. Calcd for  $C_{82}H_{56}Br_4N_4Ni_2O_2$ : C, 62.88; H, 3.60; N, 3.58. Found: C, 62.73; H, 3.48; N, 3.67.

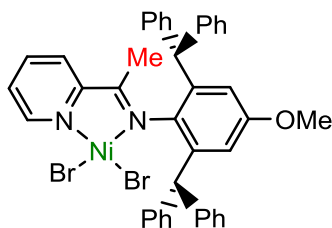

**Preparation of complex Ni3:** A mixture of **L3** (229 mg, 0.410 mmol) and  $(DME)NiBr_2$  (120 mg, 0.389 mmol) (DME = 1,2-dimethoxyethane) were stirred in 25 mL of dichloromethane overnight at room temperature. The solvent was evaporated under reduced pressure, the desired compound can be isolated from repeated recrystallized from n-hexane and dichloromethane. The pure compound was obtained as an orange solid (268 mg, 88.6% yield).

**MALDI-TOF-MS (m/z):** 695.1  $[M-Br]^+$ .

**Elemental analysis:** Anal. Calcd for  $C_{40}H_{34}Br_2N_2NiO$ : C, 61.81; H, 4.41; N, 3.60. Found: C, 61.96; H, 4.40; N, 3.72.

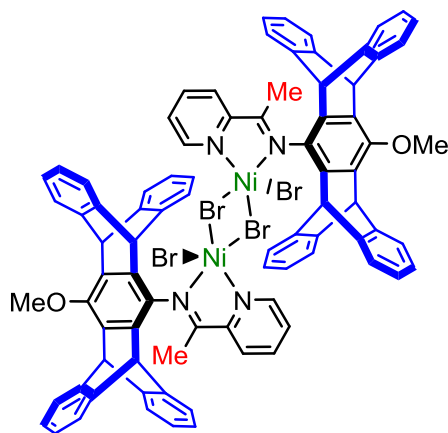

**Preparation of complex Ni4:** A mixture of **L4** (237 mg, 0.409 mmol) and  $(DME)NiBr_2$  (120 mg, 0.389 mmol) (DME = 1,2-dimethoxyethane) were stirred in 25 mL of dichloromethane overnight at room temperature. The solvent was evaporated under reduced pressure, the desired compound can be isolated from repeated recrystallized from n-hexane and dichloromethane. The pure compound was obtained as an orange solid (240 mg, 77.4% yield).

**MALDI-TOF-MS (m/z):** 715.1  $[M-Br]^+$ .

**Elemental analysis:** Anal. Calcd for  $C_{84}H_{60}Br_4N_4Ni_2O_2$ : C, 63.28; H, 3.79; N, 3.51. Found: C, 63.41; H, 3.90; N, 3.41.

### 3. $^1\text{H}$ and $^{13}\text{C}$ NMR spectra of Ligands

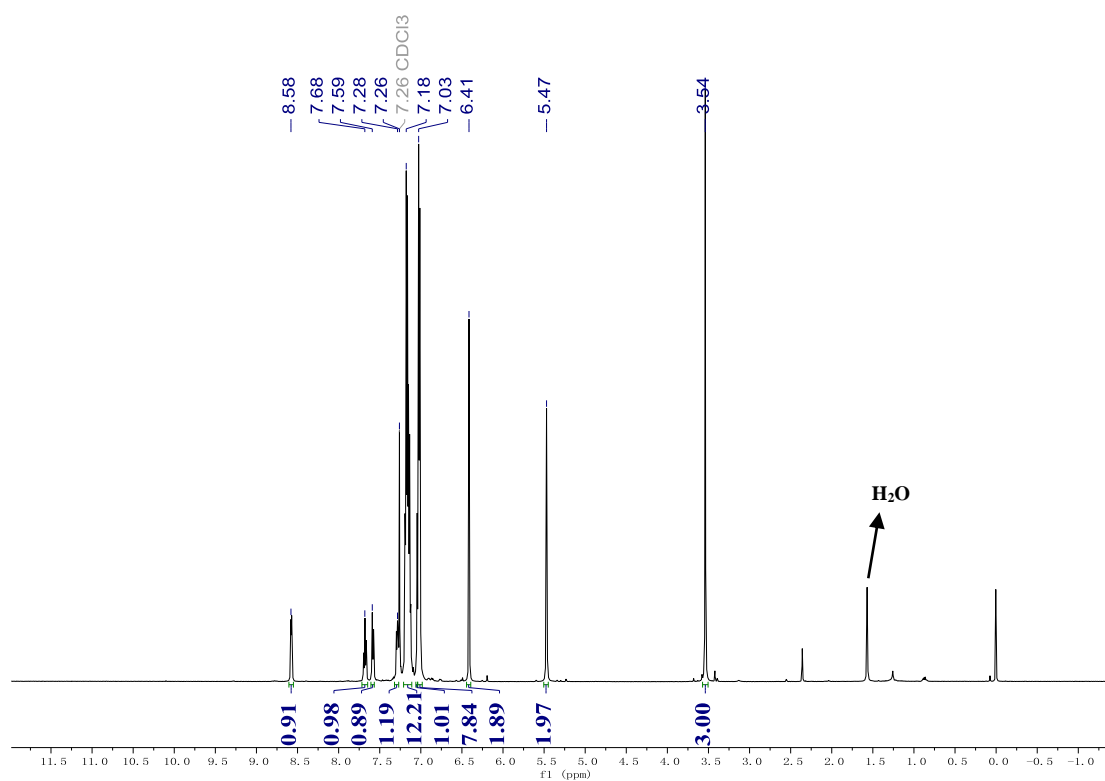

**Figure S1.**  $^1\text{H}$  NMR spectrum of **L1** in  $\text{CDCl}_3$

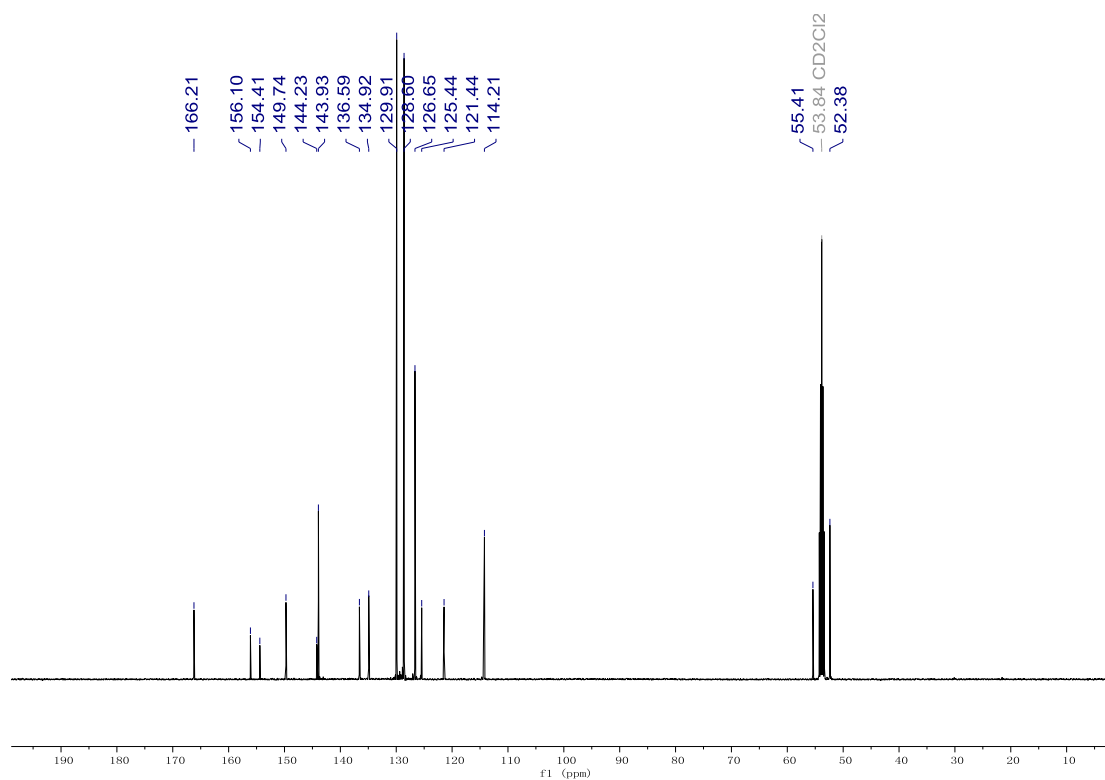

**Figure S2.**  $^{13}\text{C}$  NMR spectrum of **L1** in  $\text{CD}_2\text{Cl}_2$



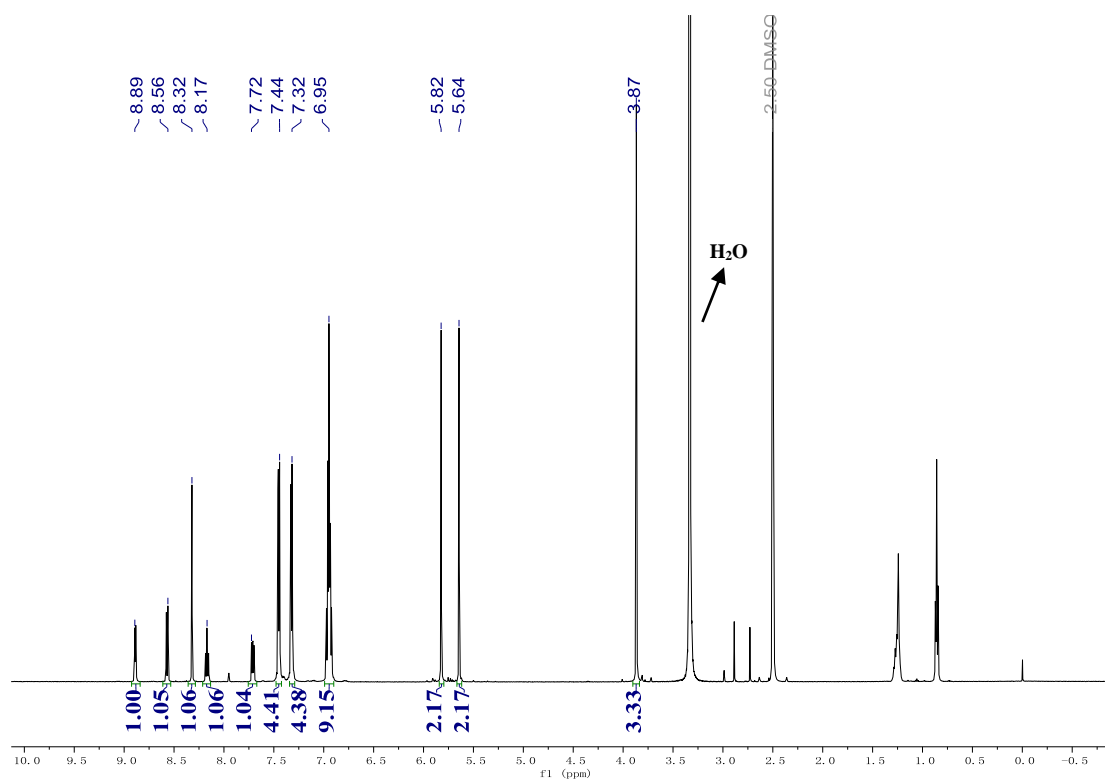

**Figure S3.**  $^1\text{H}$  NMR spectrum of **L2** in  $\text{DMSO-}d_6$

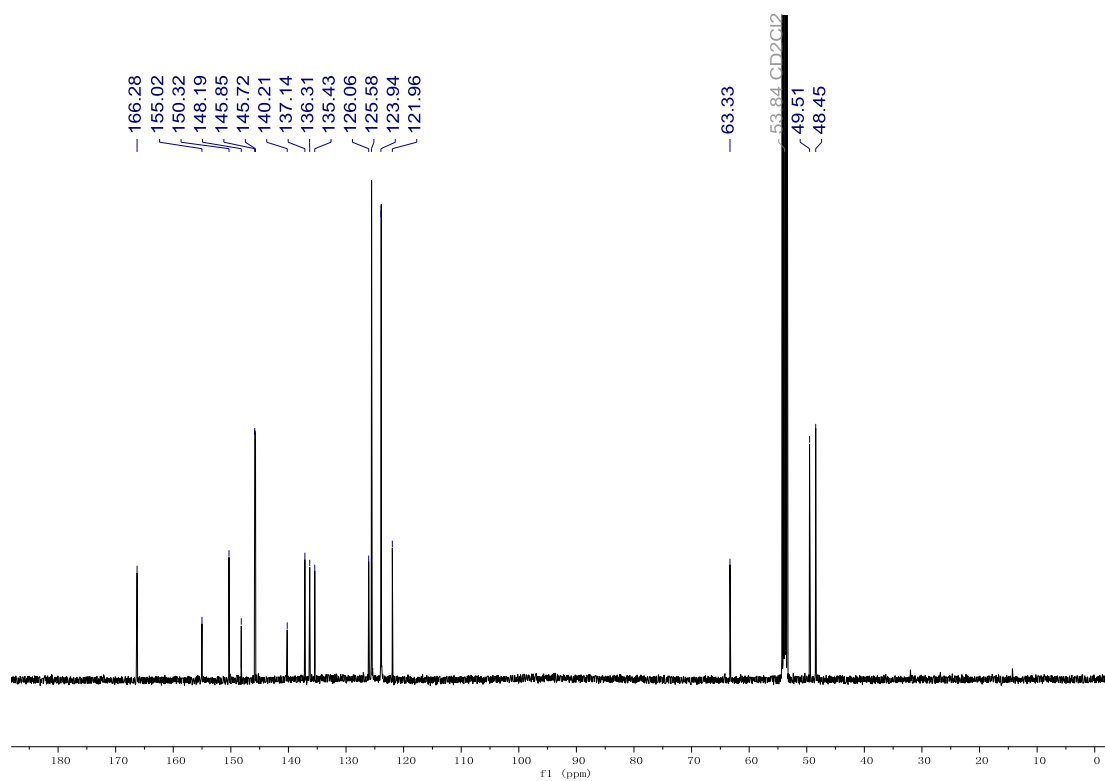

**Figure S4.**  $^{13}\text{C}$  NMR spectrum of **L2** in  $\text{CD}_2\text{Cl}_2$

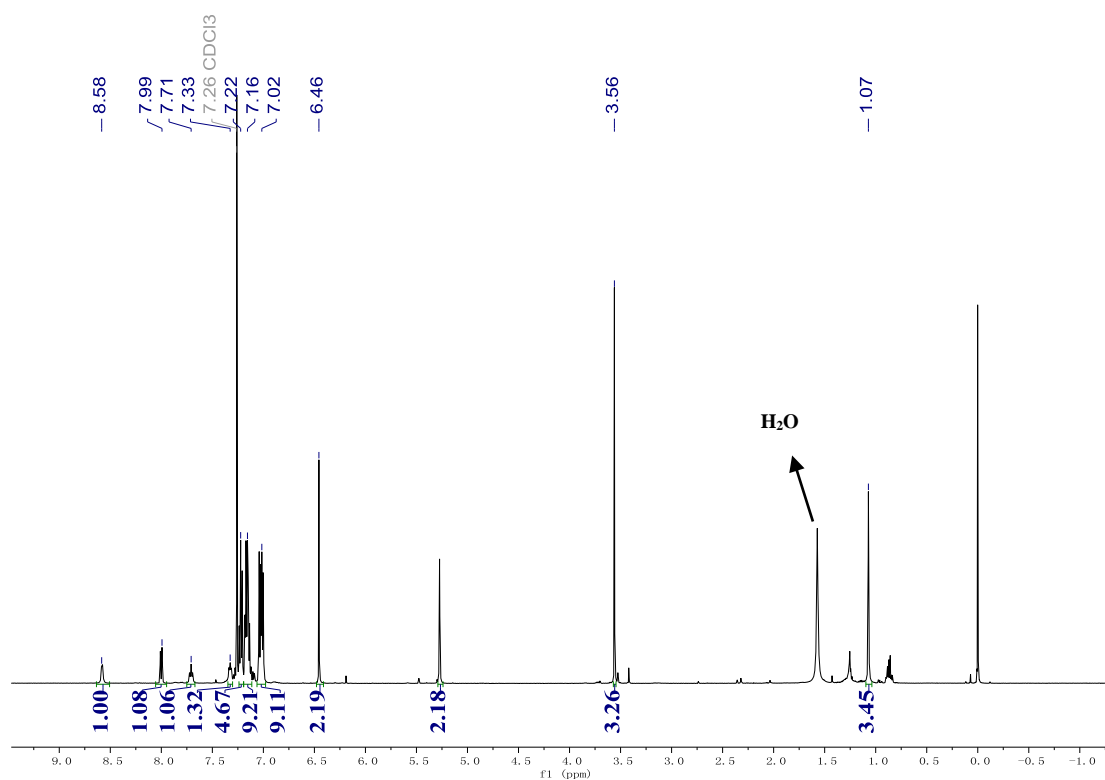

**Figure S5.** <sup>1</sup>H NMR spectrum of **L3** in CDCl<sub>3</sub>

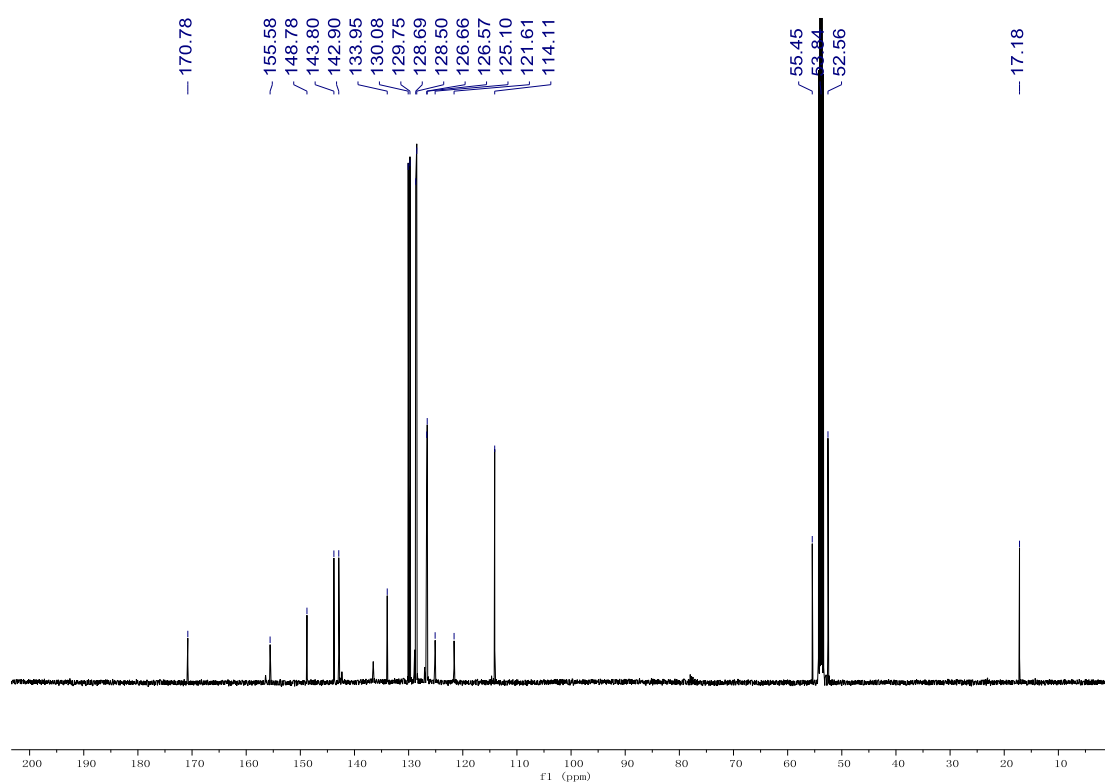

**Figure S6.** <sup>13</sup>C NMR spectrum of **L3** in CD<sub>2</sub>Cl<sub>2</sub>

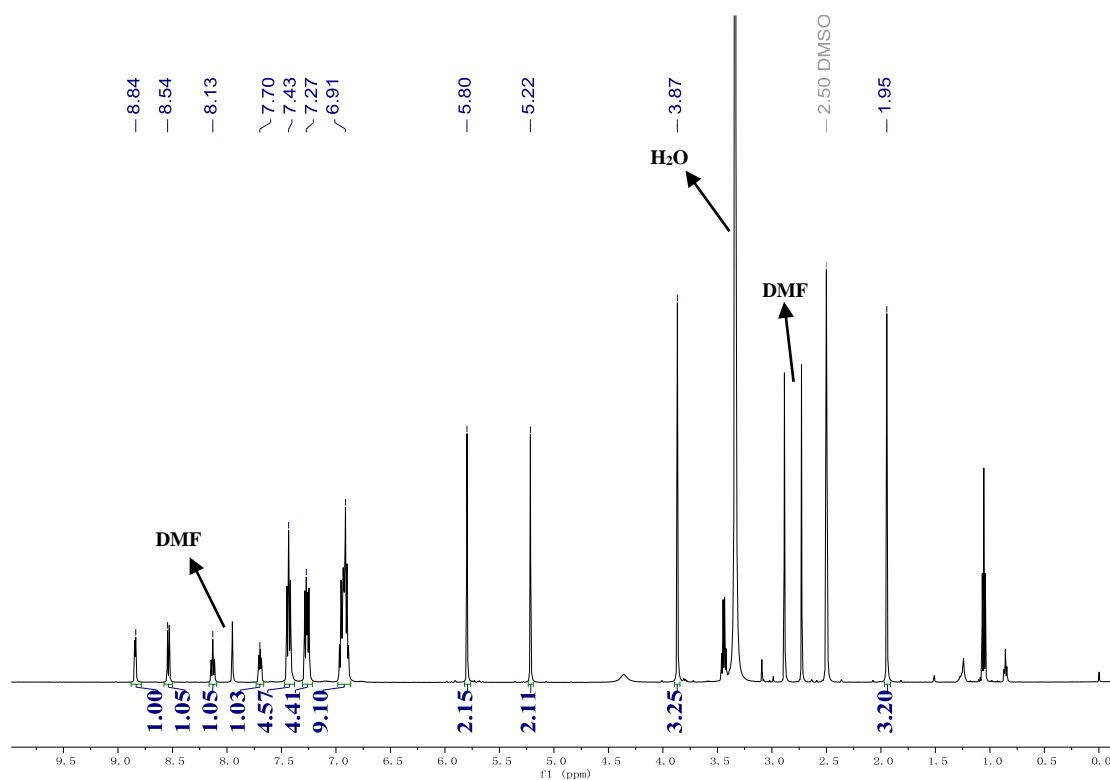

**Figure S7.** <sup>1</sup>H NMR spectrum of **L4** in DMSO-*d*<sub>6</sub>

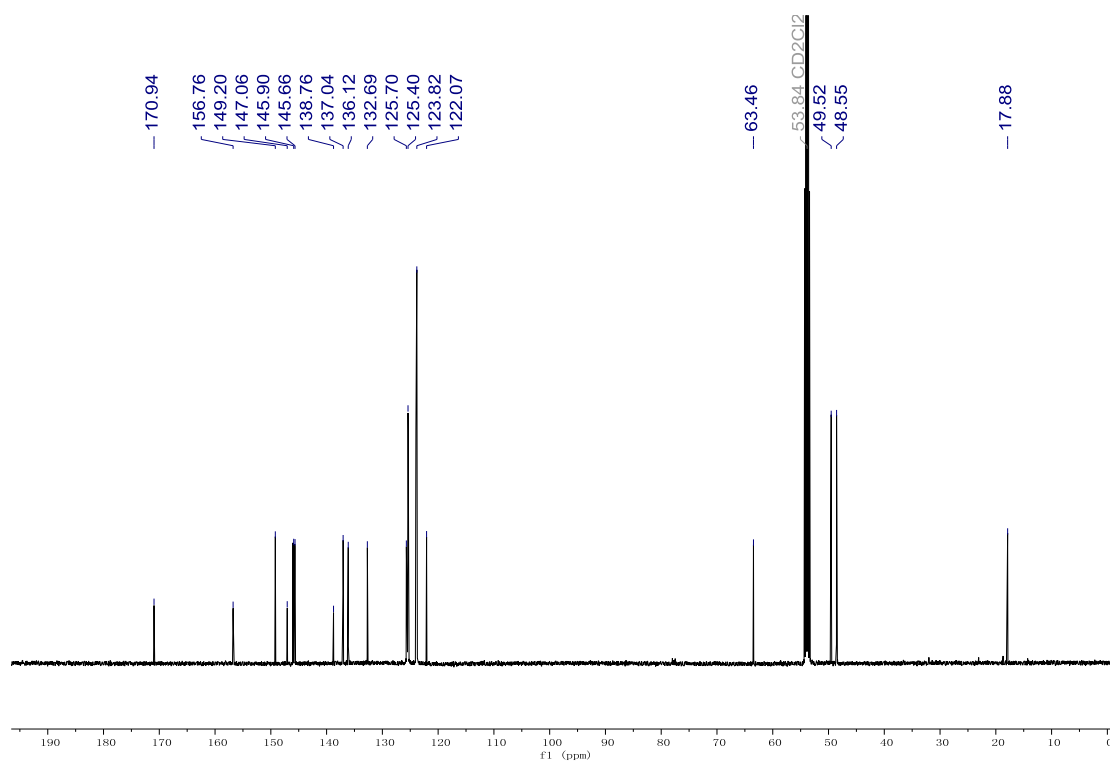

**Figure S8.** <sup>13</sup>C NMR spectrum of **L4** in CD<sub>2</sub>Cl<sub>2</sub>

#### 4. MALDI-TOF-MS of Ni complexes

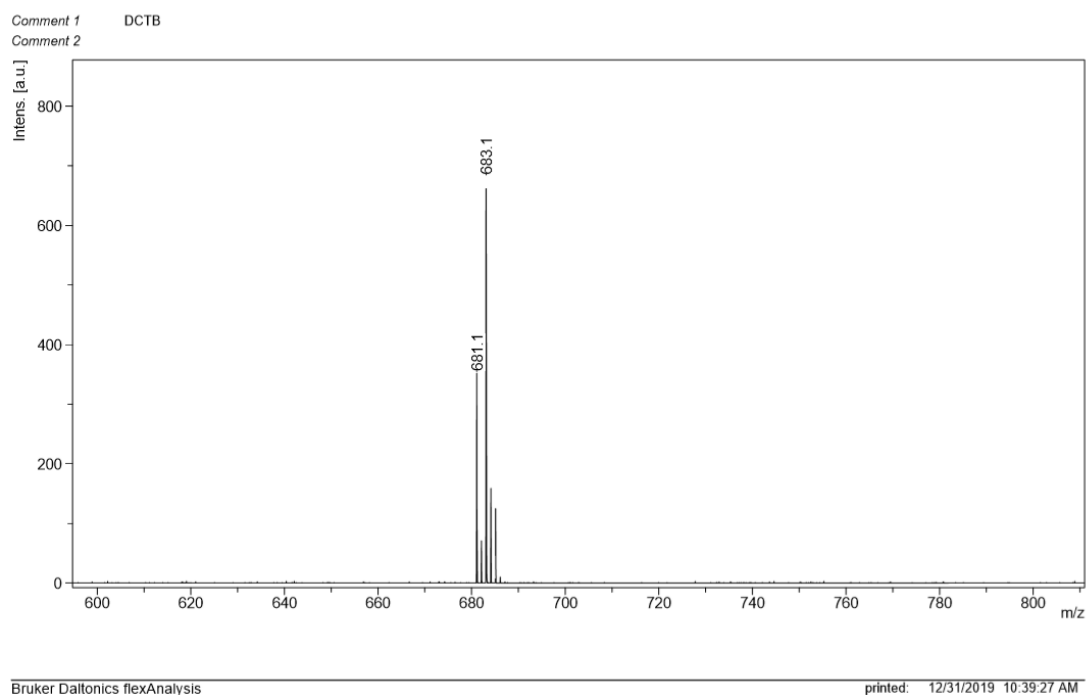

**Figure S9.** MALDI-TOF-MS of complex **Ni1**

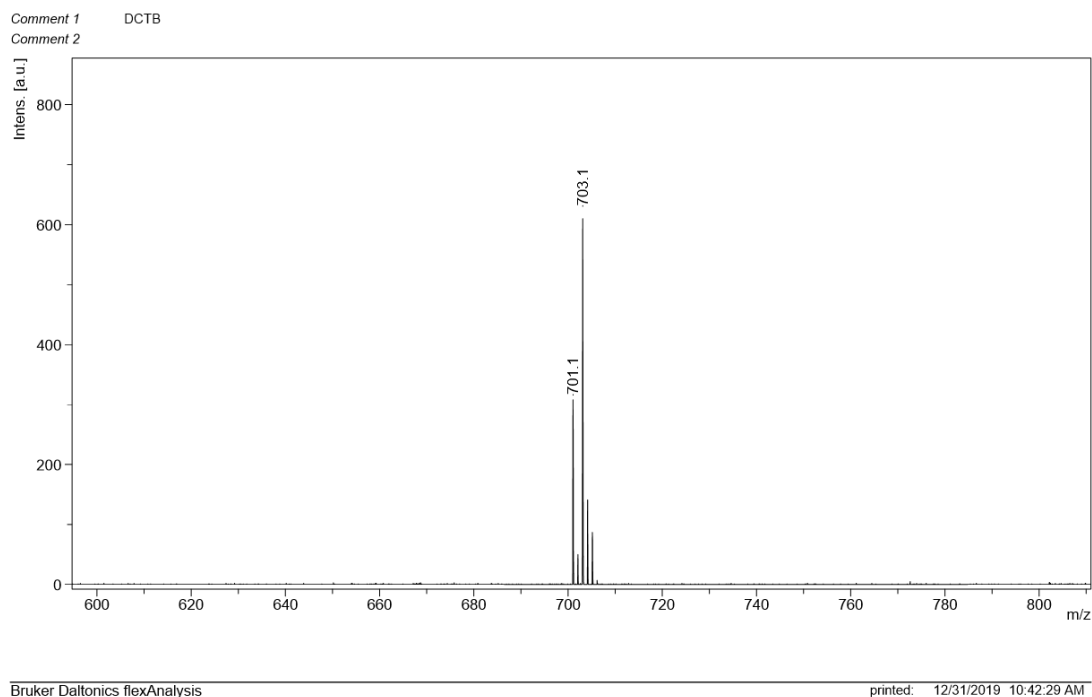

**Figure S10.** MALDI-TOF-MS of complex **Ni2**

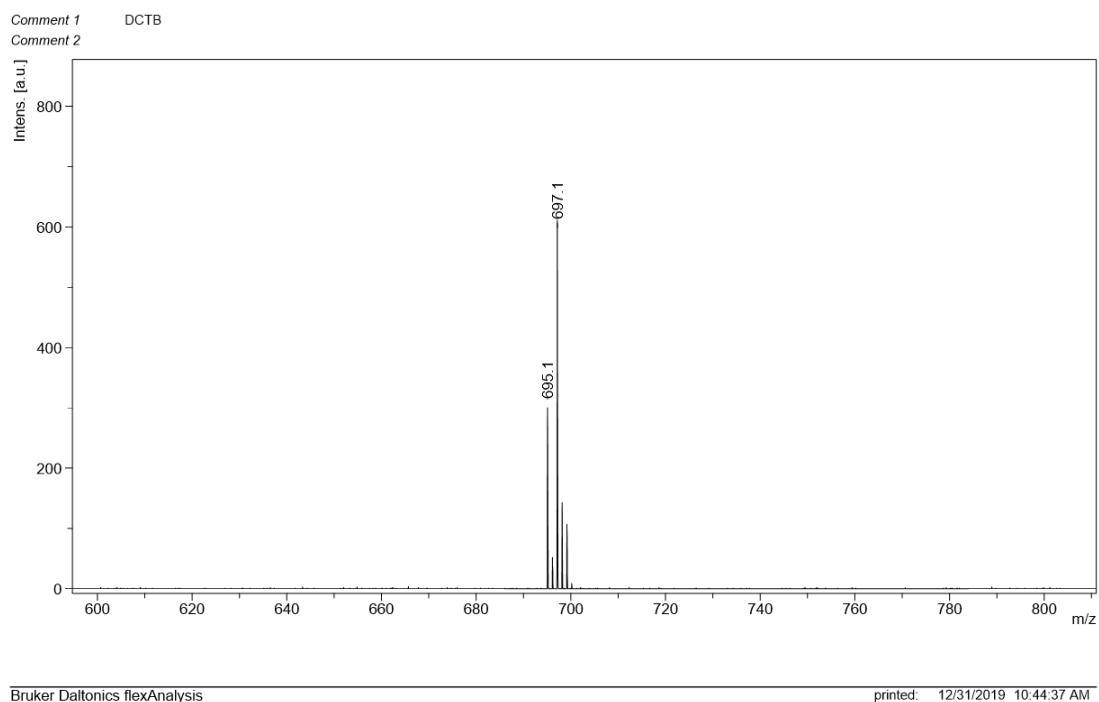

**Figure S11.** MALDI-TOF-MS of complex **Ni3**

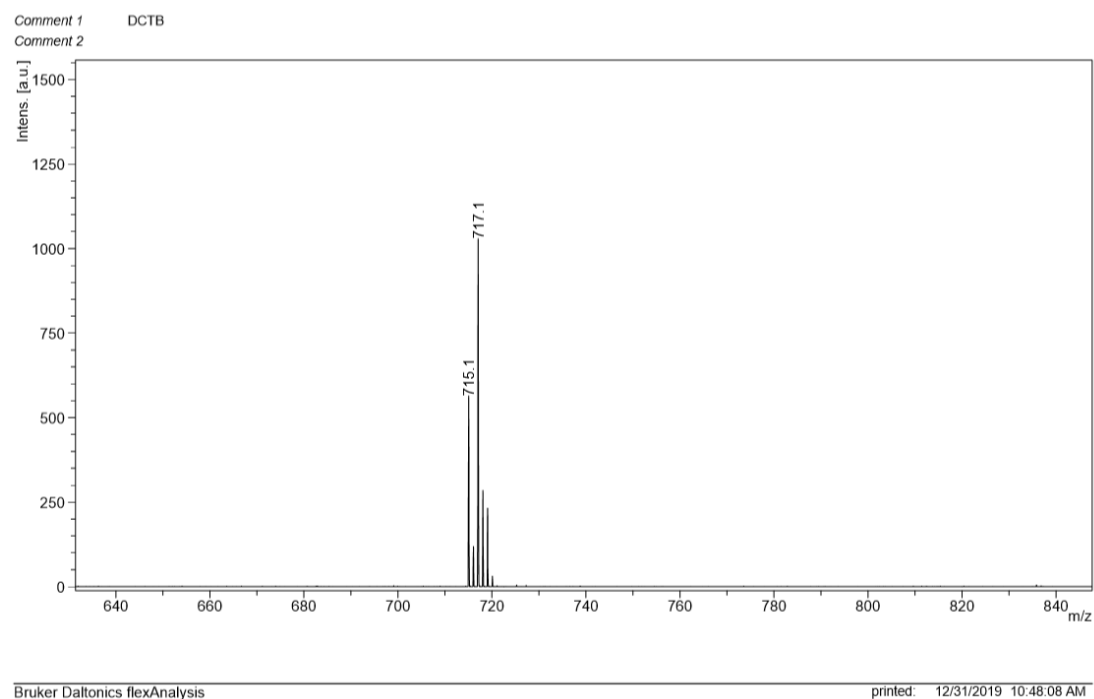

**Figure S12.** MALDI-TOF-MS of complex **Ni4**

## 5 NMR figures of polymers

$$\text{Me groups /1000C} = \frac{(I_1 - \frac{3I_5}{2} - I_6 * 3)}{(I_1 + I_2 + I_3 + I_4 + I_5 + I_6 + I_7)/2} * 1000$$

$$= \frac{(3 - \frac{3*0.03}{2} - 0.32*3)/3}{(3+22.06+0.23+0.68+0.03+0.32+0.01)/2} * 1000 = 50$$

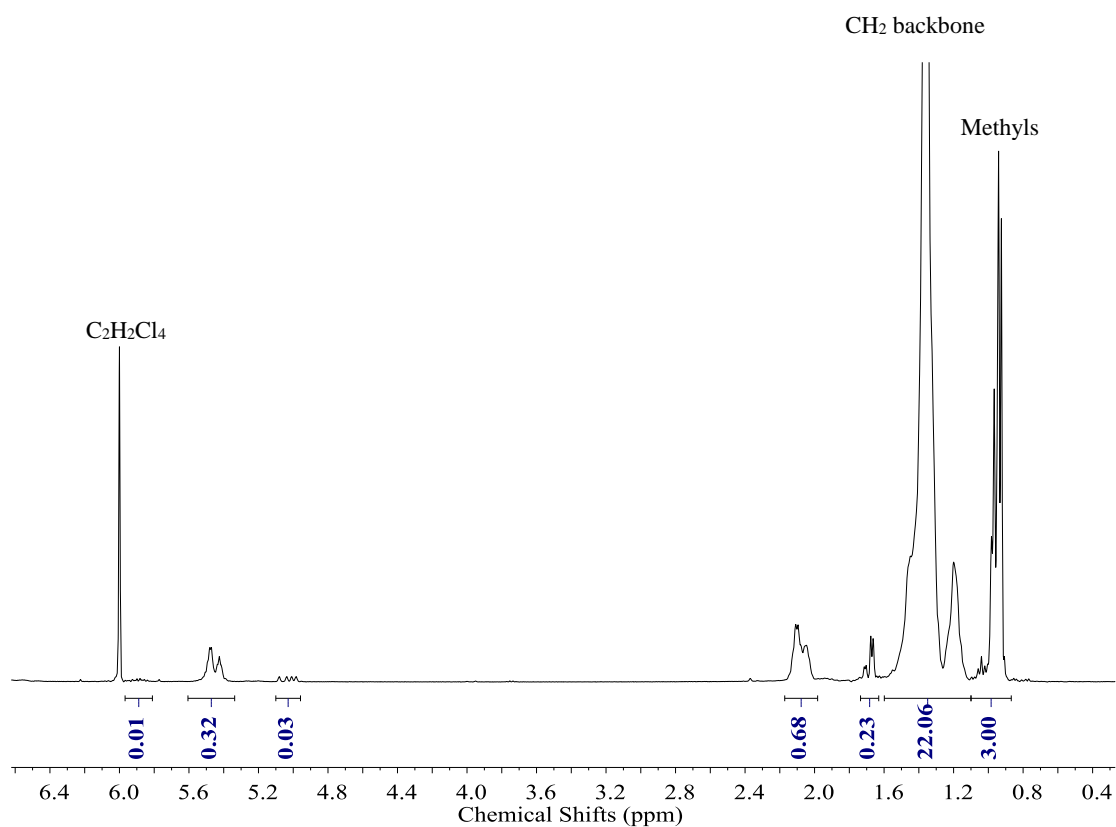

**Figure S13.** <sup>1</sup>H NMR spectrum (400 MHz, C<sub>2</sub>D<sub>2</sub>Cl<sub>4</sub>, 110 °C) of the polyethylene generated by complex **Ni1** from table 1, entry 1.

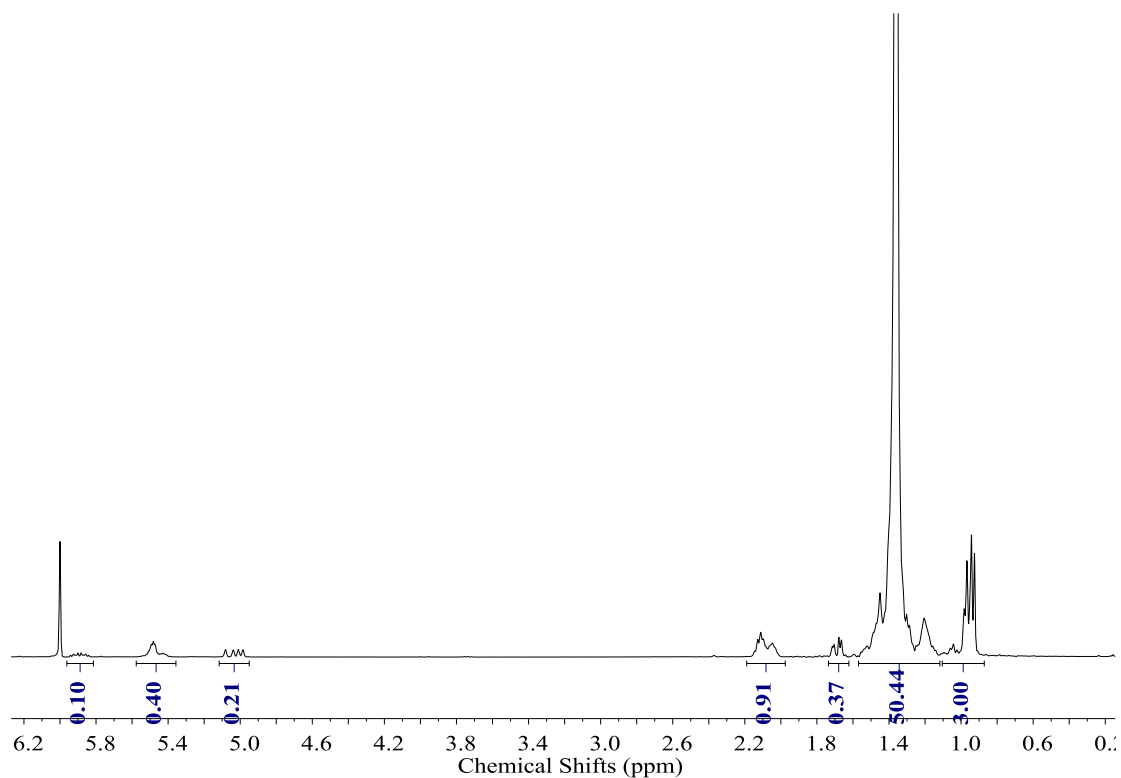

**Figure S14.**  $^1\text{H}$  NMR spectrum (400 MHz,  $\text{C}_2\text{D}_2\text{Cl}_4$ , 110  $^\circ\text{C}$ ) of the polyethylene generated by complex **Ni2** from table 1, entry 2.

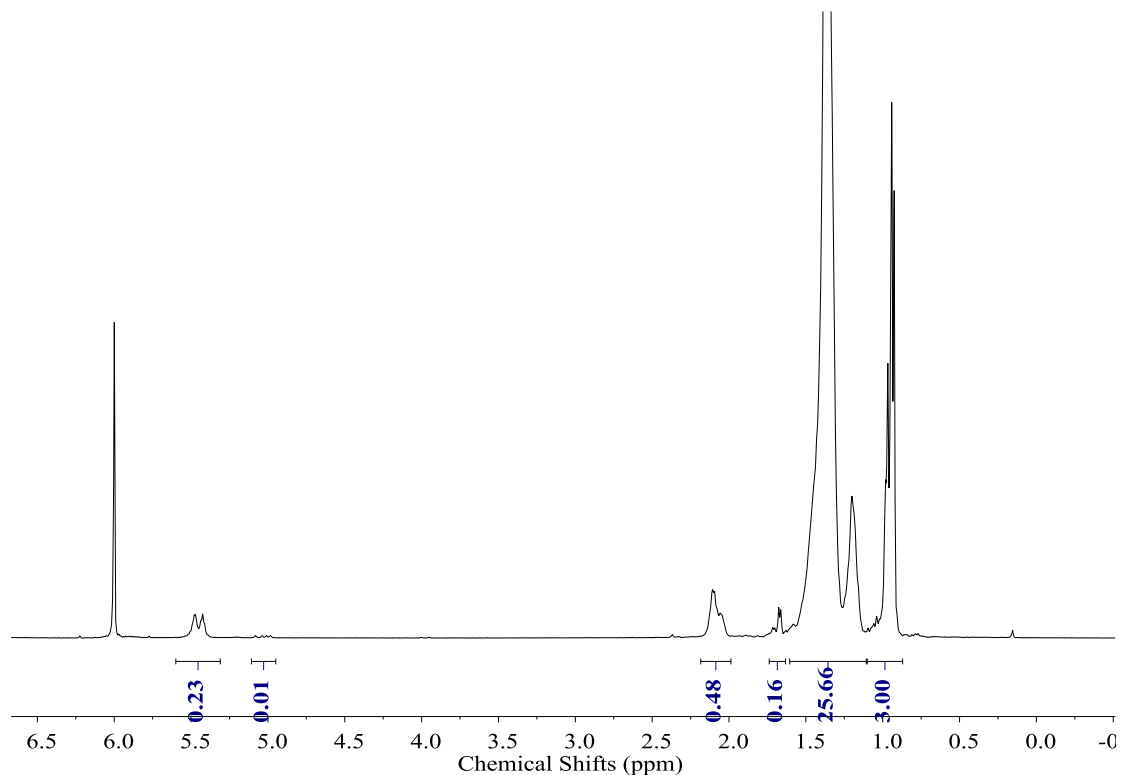

**Figure S15.**  $^1\text{H}$  NMR spectrum (400 MHz,  $\text{C}_2\text{D}_2\text{Cl}_4$ , 110  $^\circ\text{C}$ ) of the polyethylene generated by complex **Ni3** from table 1, entry 3.

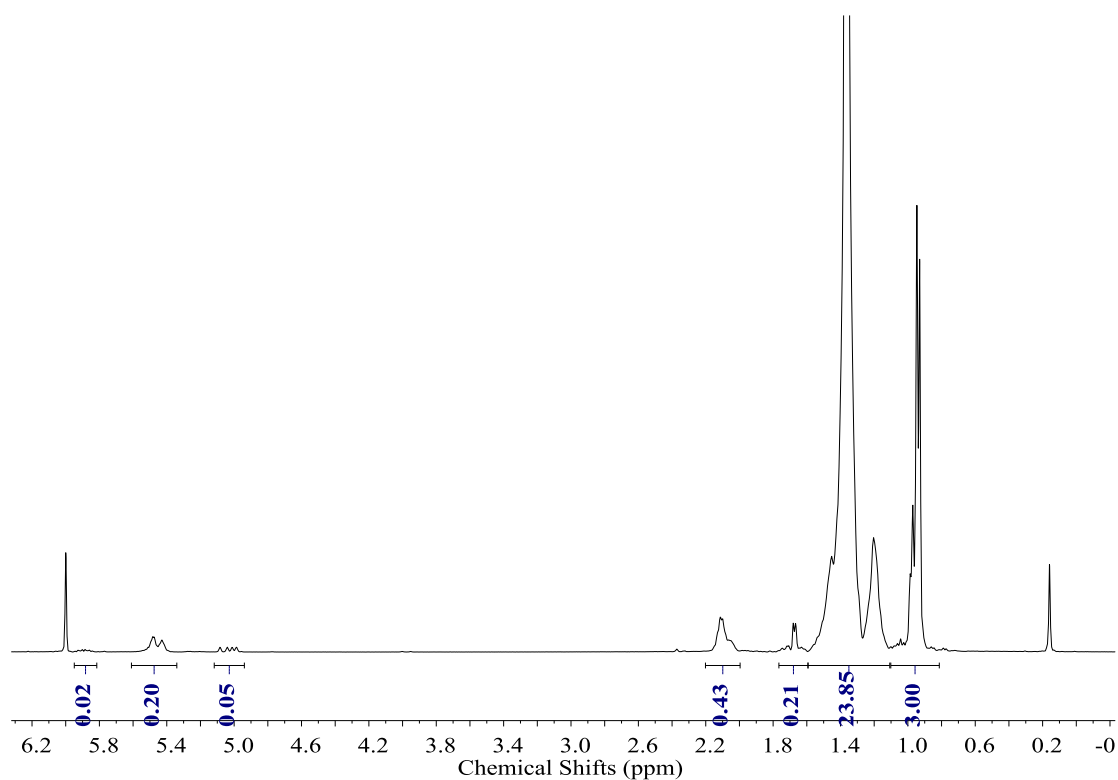

**Figure S16.**  $^1\text{H}$  NMR spectrum (400 MHz,  $\text{C}_2\text{D}_2\text{Cl}_4$ , 110  $^\circ\text{C}$ ) of the polyethylene generated by complex **Ni4** from table 1, entry 4.

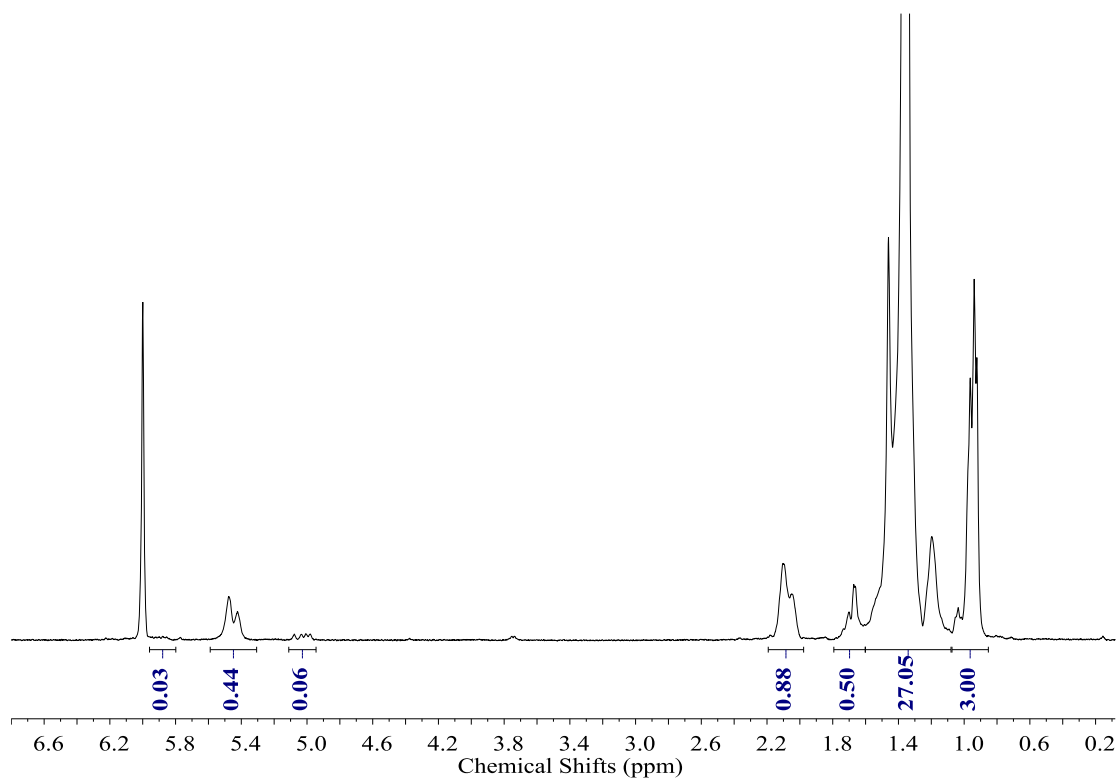

**Figure S17.**  $^1\text{H}$  NMR spectrum (400 MHz,  $\text{C}_2\text{D}_2\text{Cl}_4$ , 110  $^\circ\text{C}$ ) of the polyethylene generated by complex **Ni1** from table 1, entry 5.



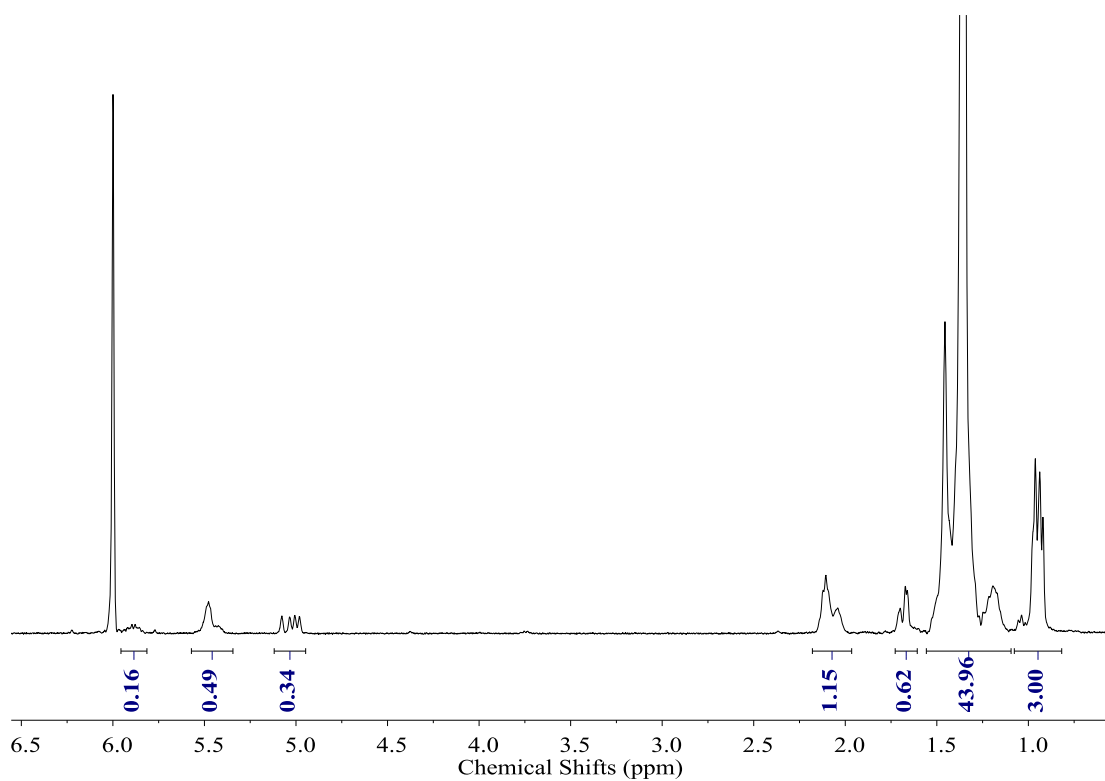

**Figure S18.**  $^1\text{H}$  NMR spectrum (400 MHz,  $\text{C}_2\text{D}_2\text{Cl}_4$ , 110  $^\circ\text{C}$ ) of the polyethylene generated by complex **Ni2** from table 1, entry 6.

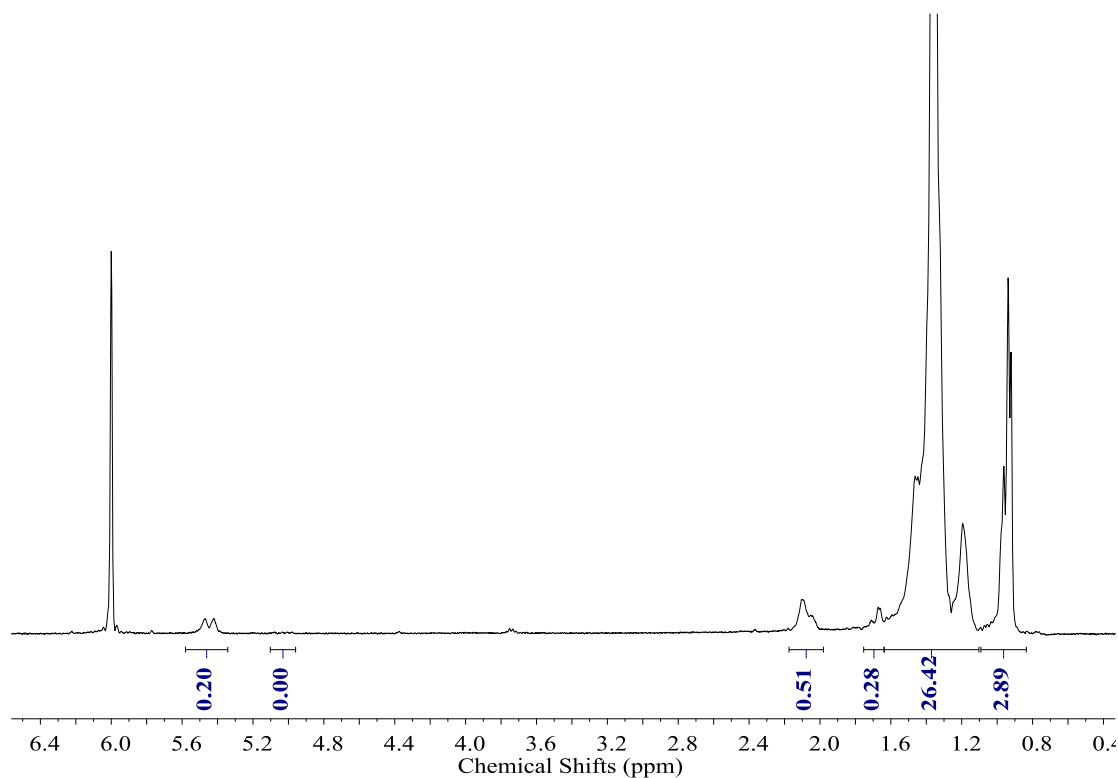

**Figure S19.**  $^1\text{H}$  NMR spectrum (400 MHz,  $\text{C}_2\text{D}_2\text{Cl}_4$ , 110  $^\circ\text{C}$ ) of the polyethylene generated by complex **Ni3** from table 1, entry 7.

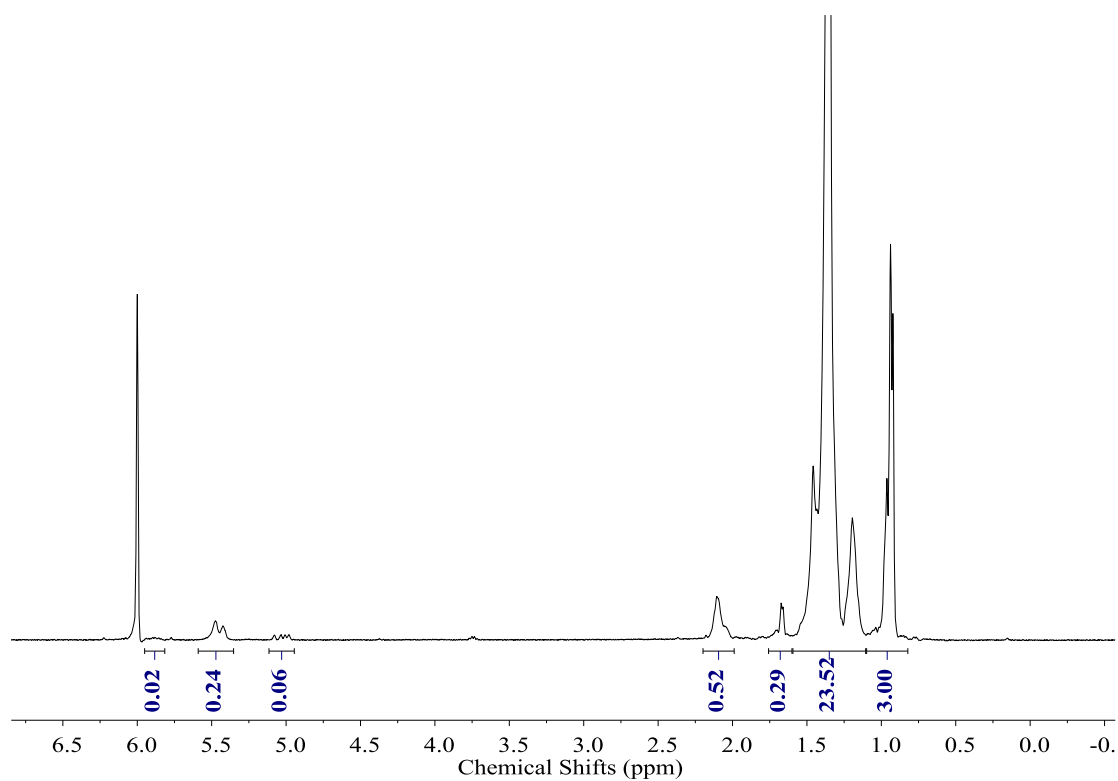

**Figure S20.**  $^1\text{H}$  NMR spectrum (400 MHz,  $\text{C}_2\text{D}_2\text{Cl}_4$ , 110  $^\circ\text{C}$ ) of the polyethylene generated by complex **Ni4** from table 1, entry 8.

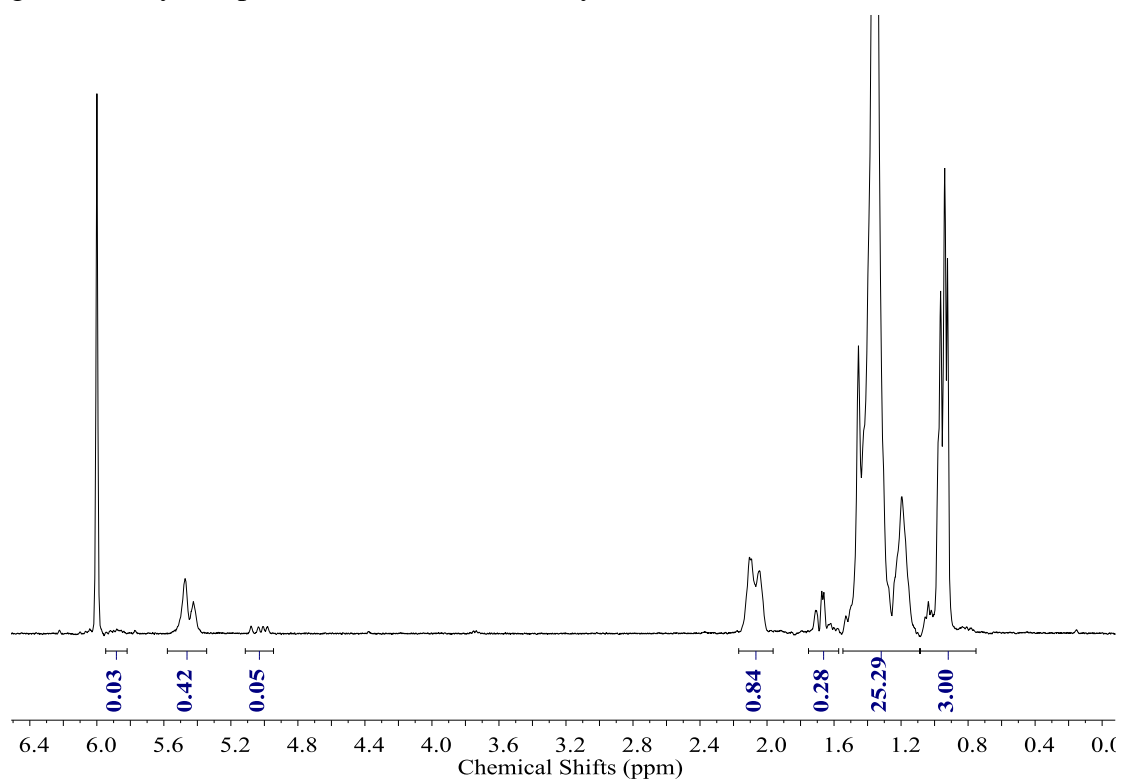

**Figure S21.**  $^1\text{H}$  NMR spectrum (400 MHz,  $\text{C}_2\text{D}_2\text{Cl}_4$ , 110  $^\circ\text{C}$ ) of the polyethylene generated by complex **Ni1** from table 1, entry 9.

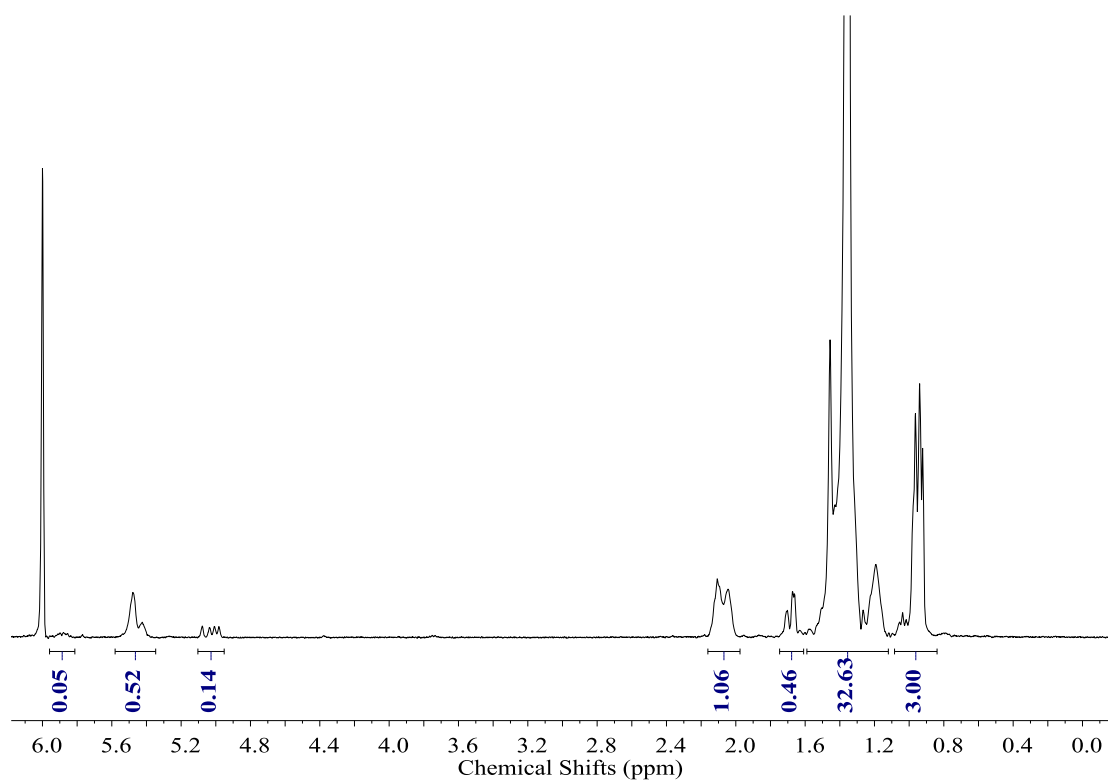

**Figure S22.**  $^1\text{H}$  NMR spectrum (400 MHz,  $\text{C}_2\text{D}_2\text{Cl}_4$ , 110  $^\circ\text{C}$ ) of the polyethylene generated by complex **Ni2** from table 1, entry 10.

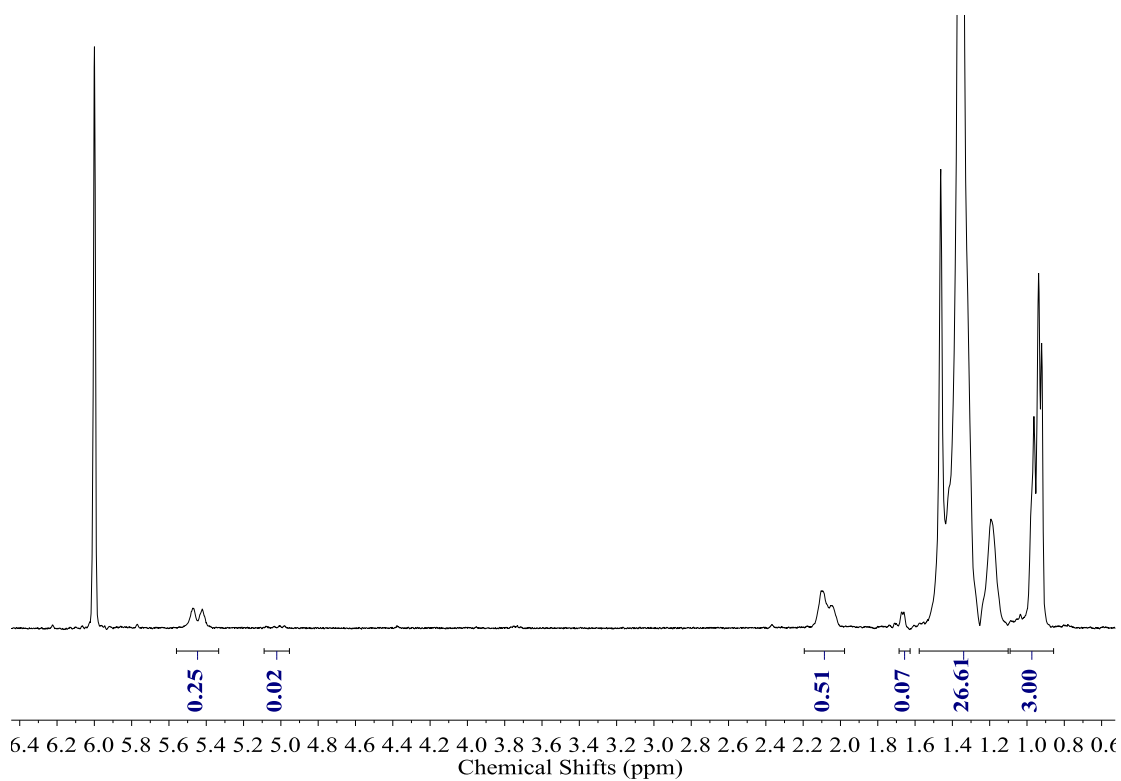

**Figure S23.**  $^1\text{H}$  NMR spectrum (400 MHz,  $\text{C}_2\text{D}_2\text{Cl}_4$ , 110  $^\circ\text{C}$ ) of the polyethylene generated by complex **Ni3** from table 1, entry 11.

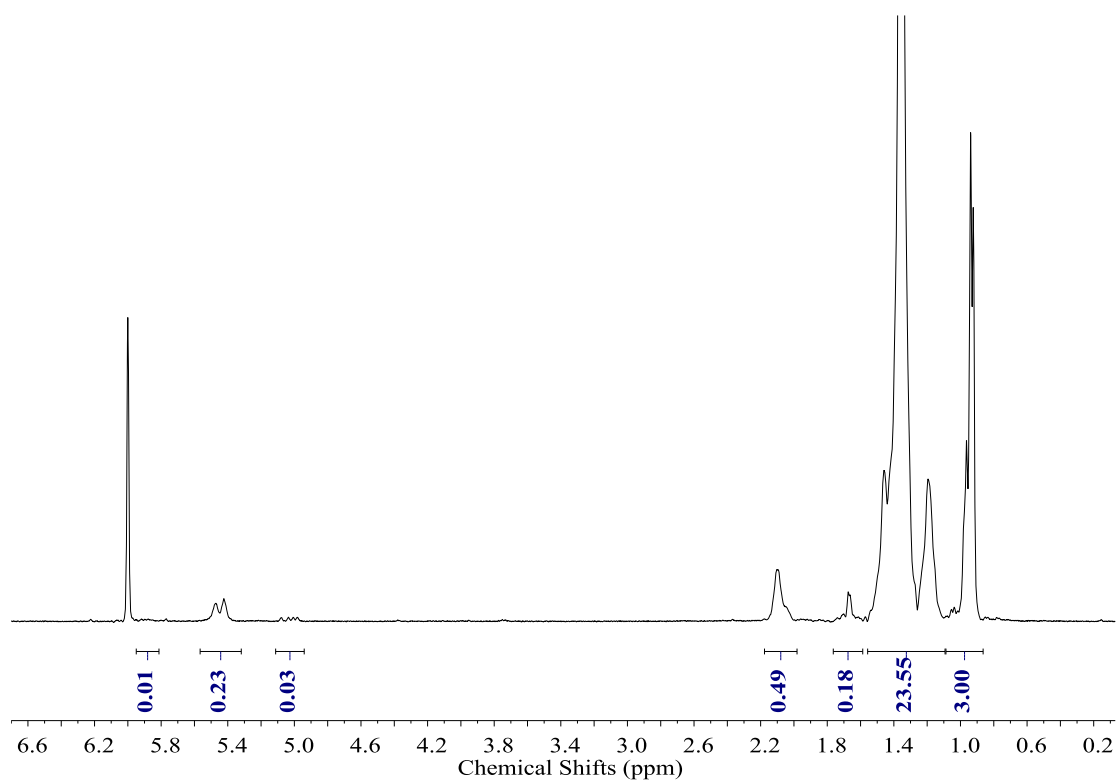

**Figure S24.**  $^1\text{H}$  NMR spectrum (400 MHz,  $\text{C}_2\text{D}_2\text{Cl}_4$ , 110  $^\circ\text{C}$ ) of the polyethylene generated by complex **Ni4** from table 1, entry 12.

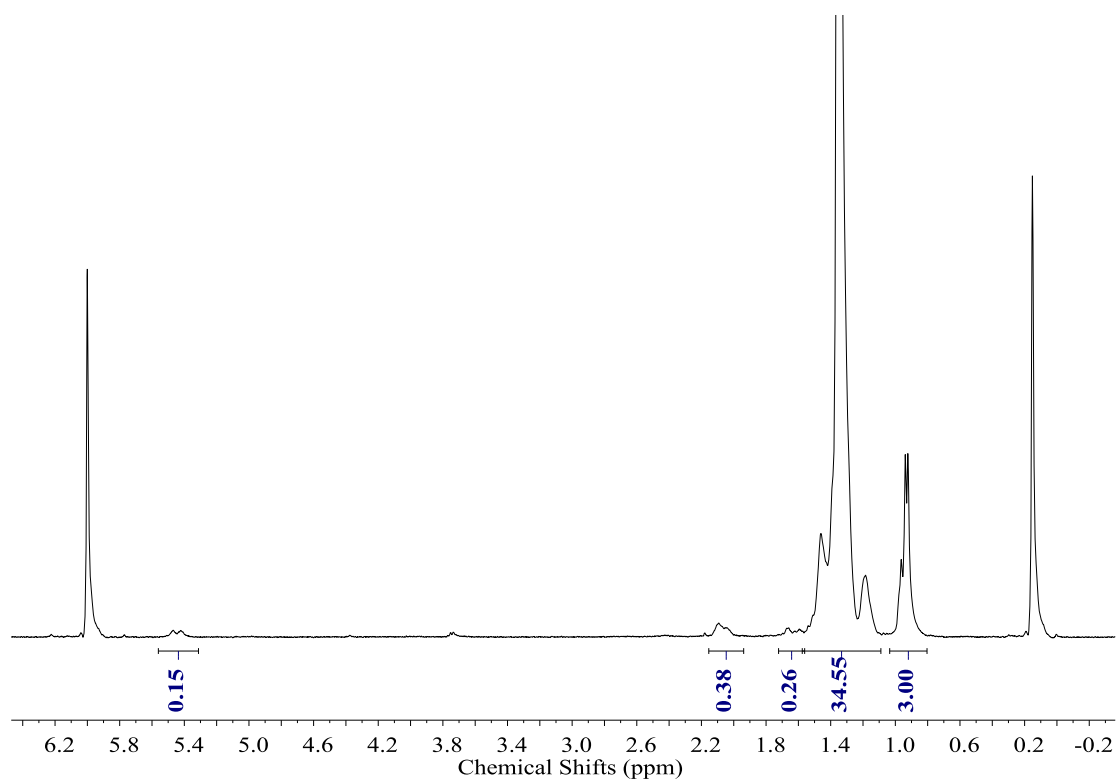

**Figure S25.**  $^1\text{H}$  NMR spectrum (400 MHz,  $\text{C}_2\text{D}_2\text{Cl}_4$ , 110  $^\circ\text{C}$ ) of the polyethylene generated by complex **Ni3** from table 1, entry 13.

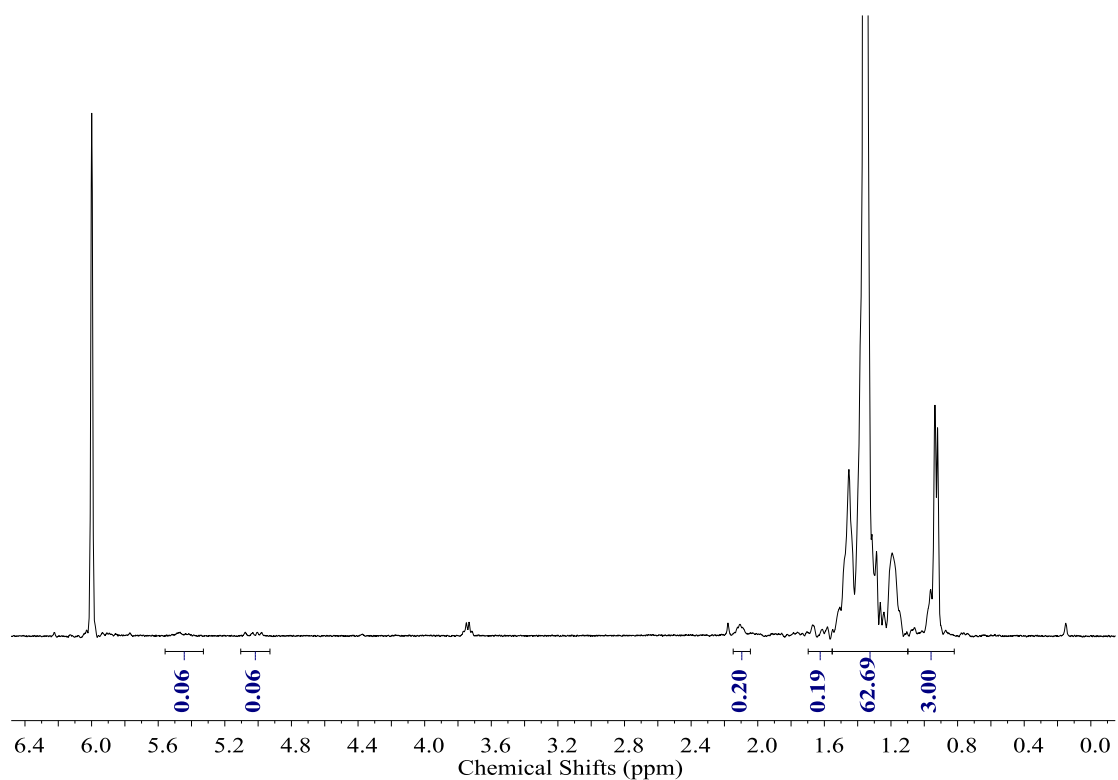

**Figure S26.**  $^1\text{H}$  NMR spectrum (400 MHz,  $\text{C}_2\text{D}_2\text{Cl}_4$ , 110  $^\circ\text{C}$ ) of the polyethylene generated by complex **Ni4** from table 1, entry 14.

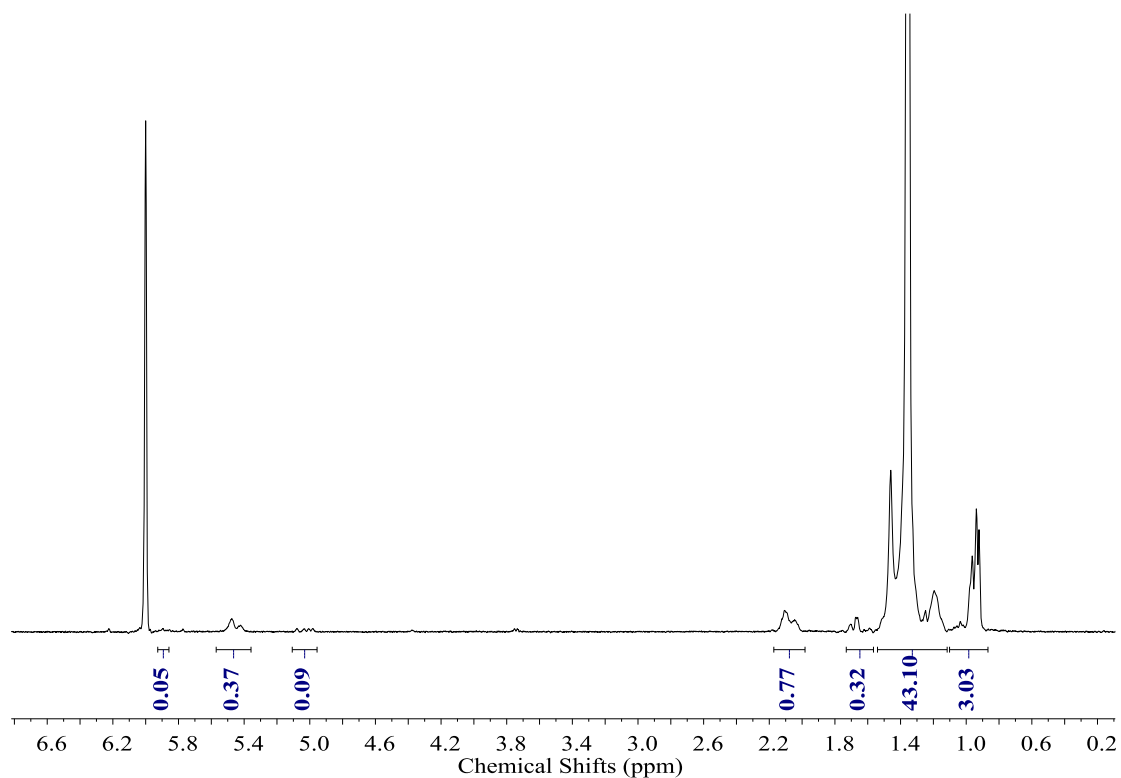

**Figure S27.**  $^1\text{H}$  NMR spectrum (400 MHz,  $\text{C}_2\text{D}_2\text{Cl}_4$ , 110  $^\circ\text{C}$ ) of the polyethylene generated by complex **Ni1** from table 3, entry 1.

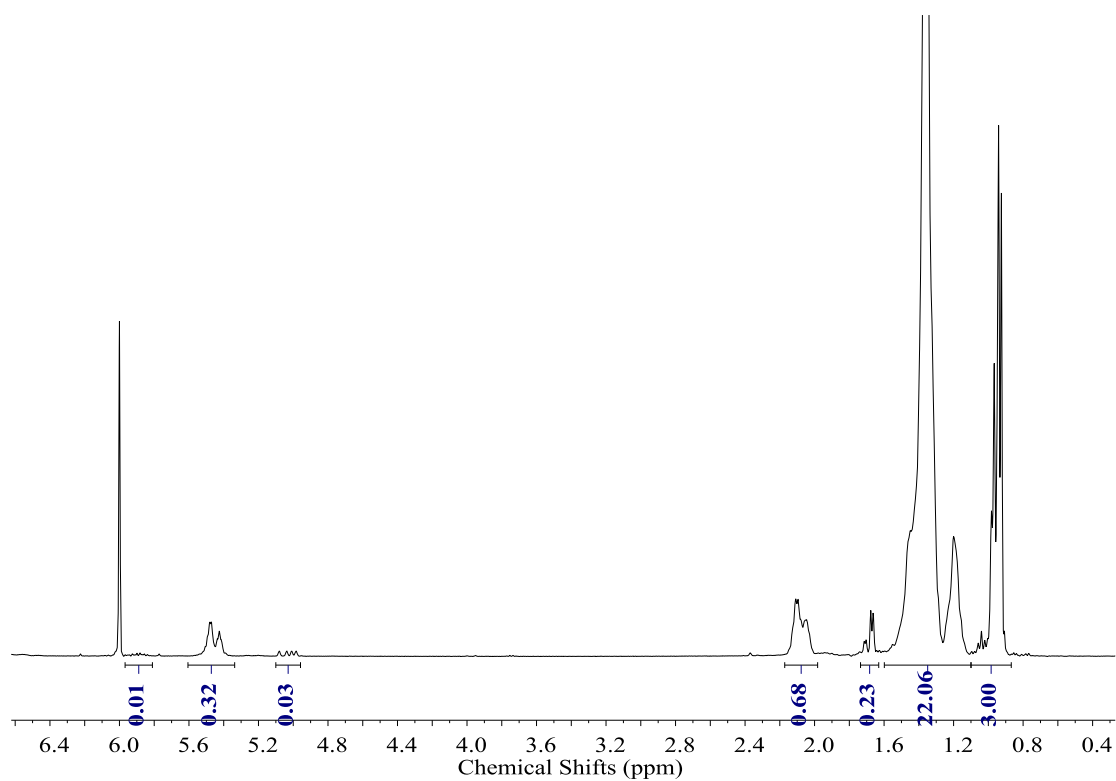

**Figure S28.**  $^1\text{H}$  NMR spectrum (400 MHz,  $\text{C}_2\text{D}_2\text{Cl}_4$ , 110 °C) of the polyethylene generated by complex **NiI** from table 3, entry 2.

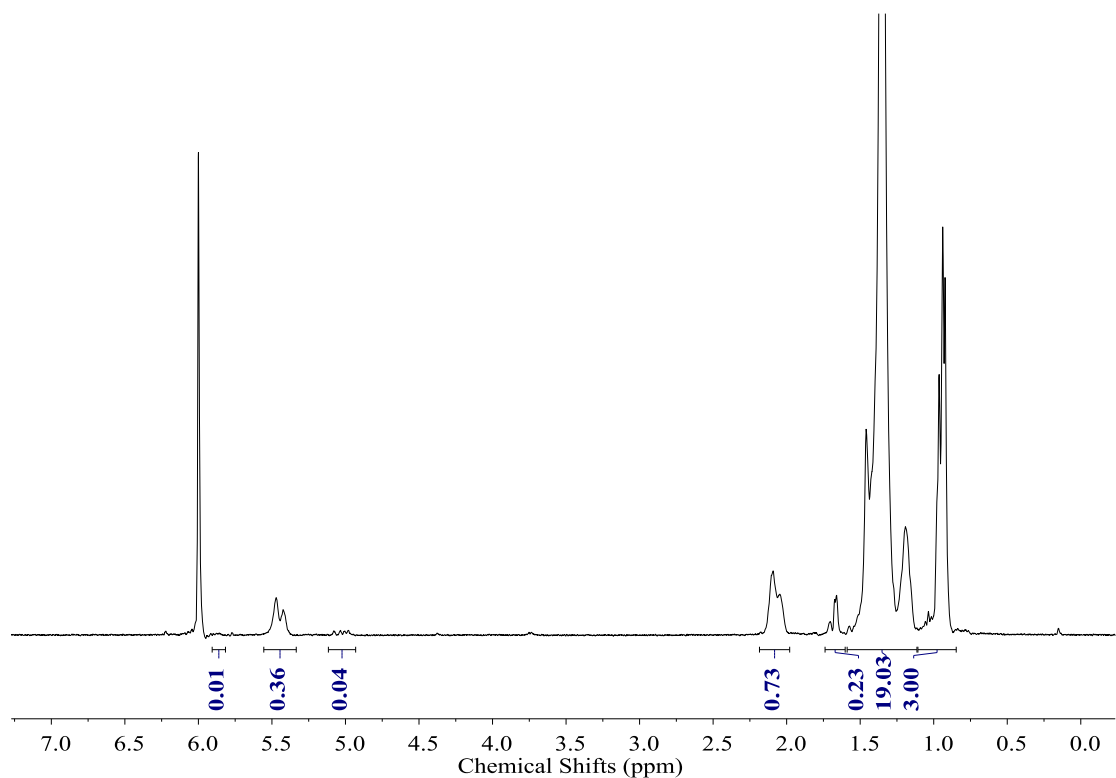

**Figure S29.**  $^1\text{H}$  NMR spectrum (400 MHz,  $\text{C}_2\text{D}_2\text{Cl}_4$ , 110 °C) of the polyethylene generated by complex **NiI** from table 3, entry 3.

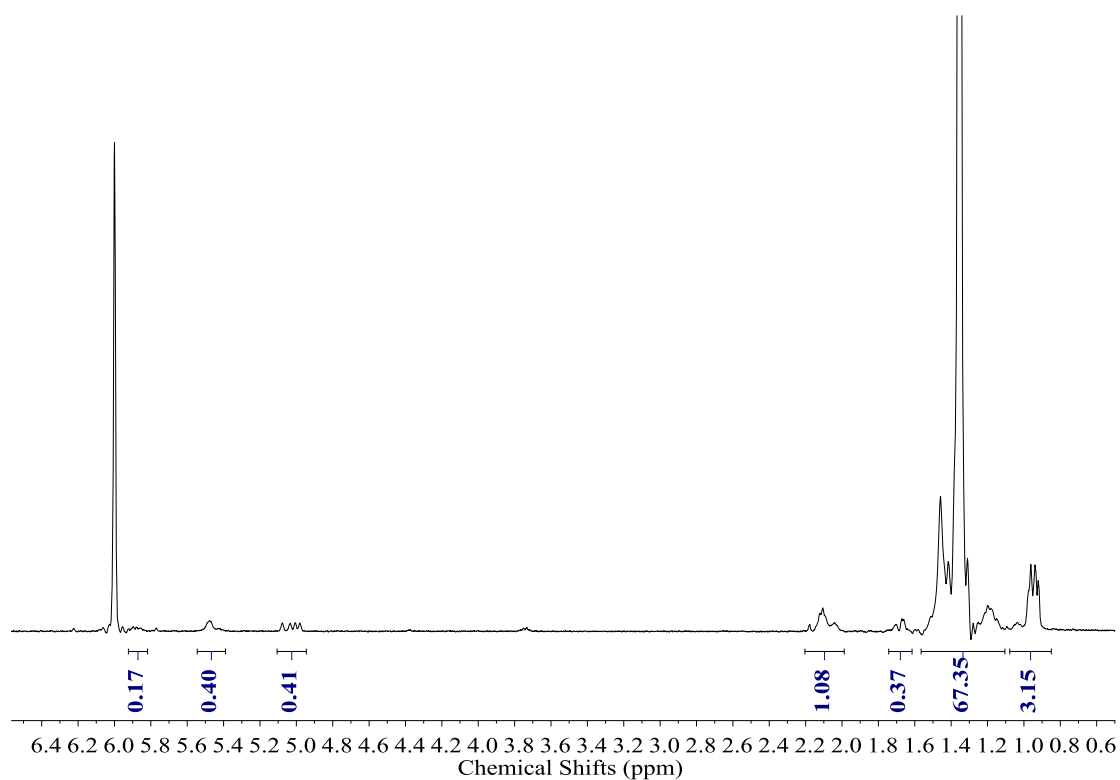

**Figure S30.**  $^1\text{H}$  NMR spectrum (400 MHz,  $\text{C}_2\text{D}_2\text{Cl}_4$ , 110  $^\circ\text{C}$ ) of the polyethylene generated by complex **Ni2** from table 3, entry 4.

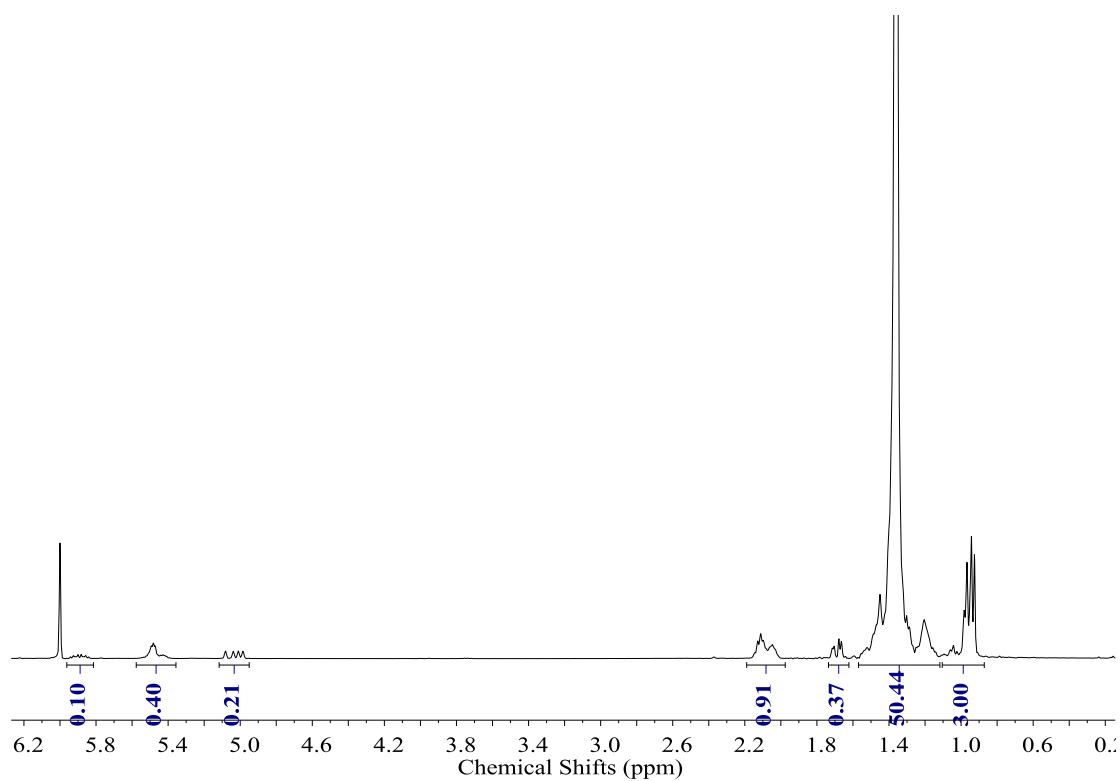

**Figure S31.**  $^1\text{H}$  NMR spectrum (400 MHz,  $\text{C}_2\text{D}_2\text{Cl}_4$ , 110  $^\circ\text{C}$ ) of the polyethylene generated by complex **Ni2** from table 3, entry 5.

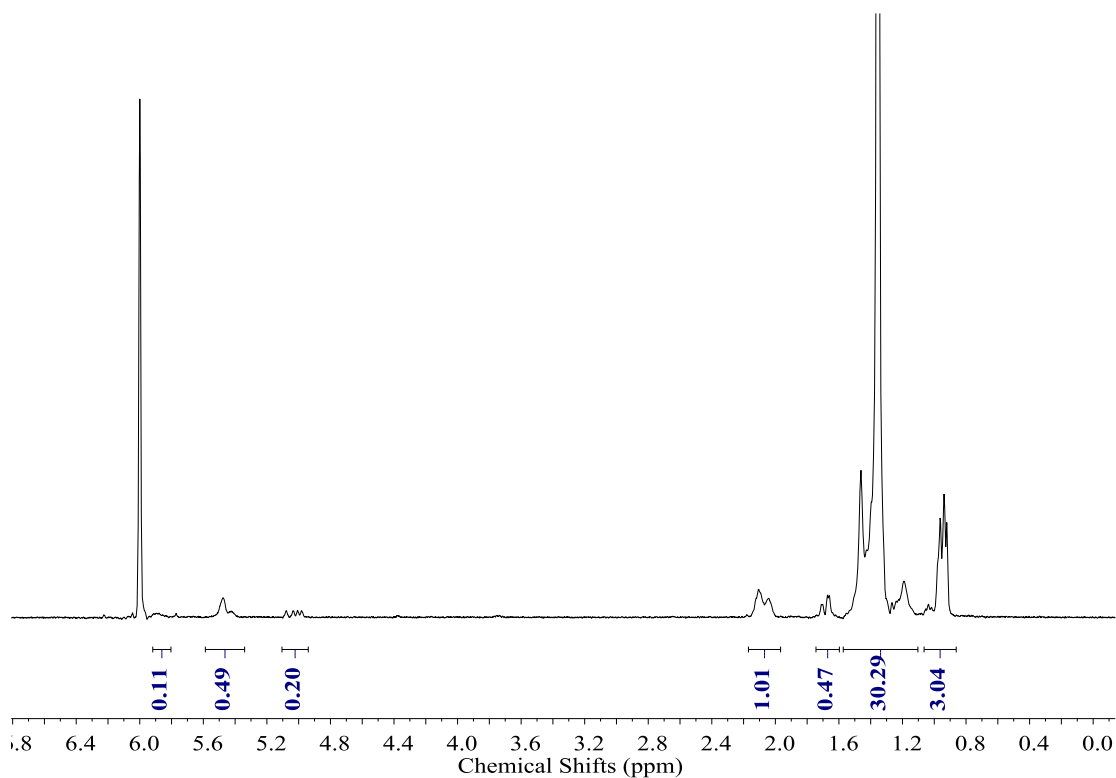

**Figure S32.**  $^1\text{H}$  NMR spectrum (400 MHz,  $\text{C}_2\text{D}_2\text{Cl}_4$ , 110  $^\circ\text{C}$ ) of the polyethylene generated by complex **Ni2** from table 3, entry 6.

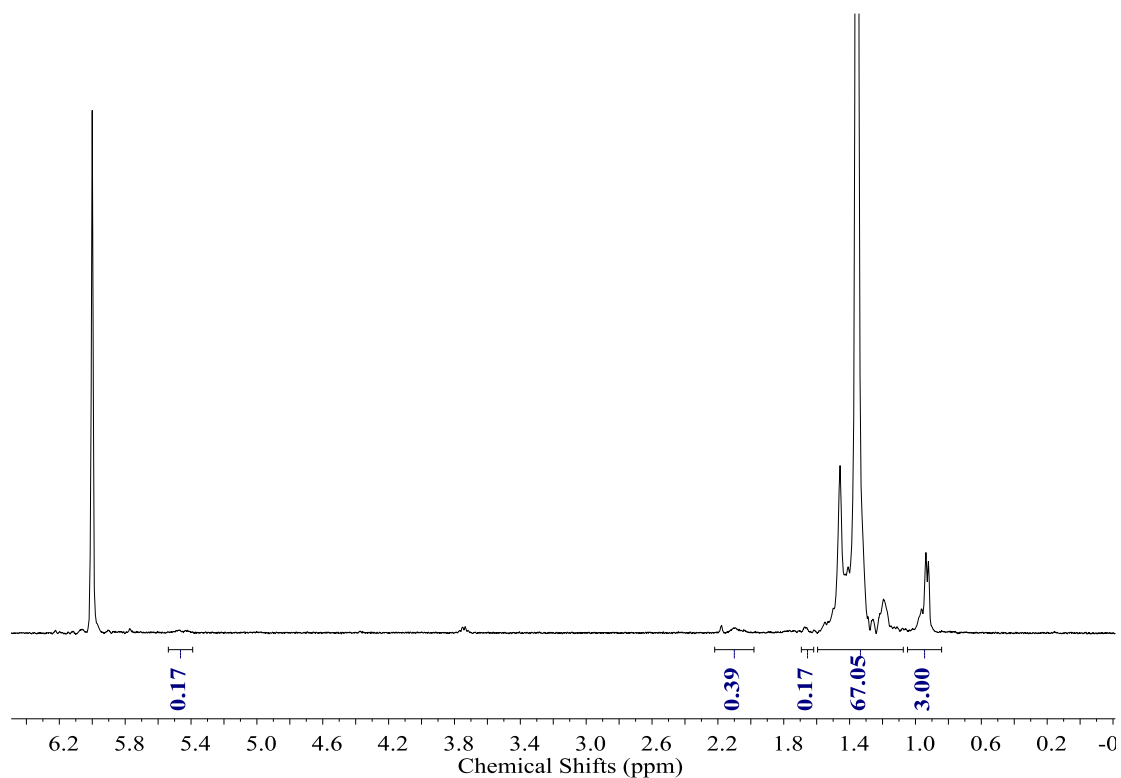

**Figure S33.**  $^1\text{H}$  NMR spectrum (400 MHz,  $\text{C}_2\text{D}_2\text{Cl}_4$ , 110  $^\circ\text{C}$ ) of the polyethylene generated by complex **Ni3** from table 3, entry 7.



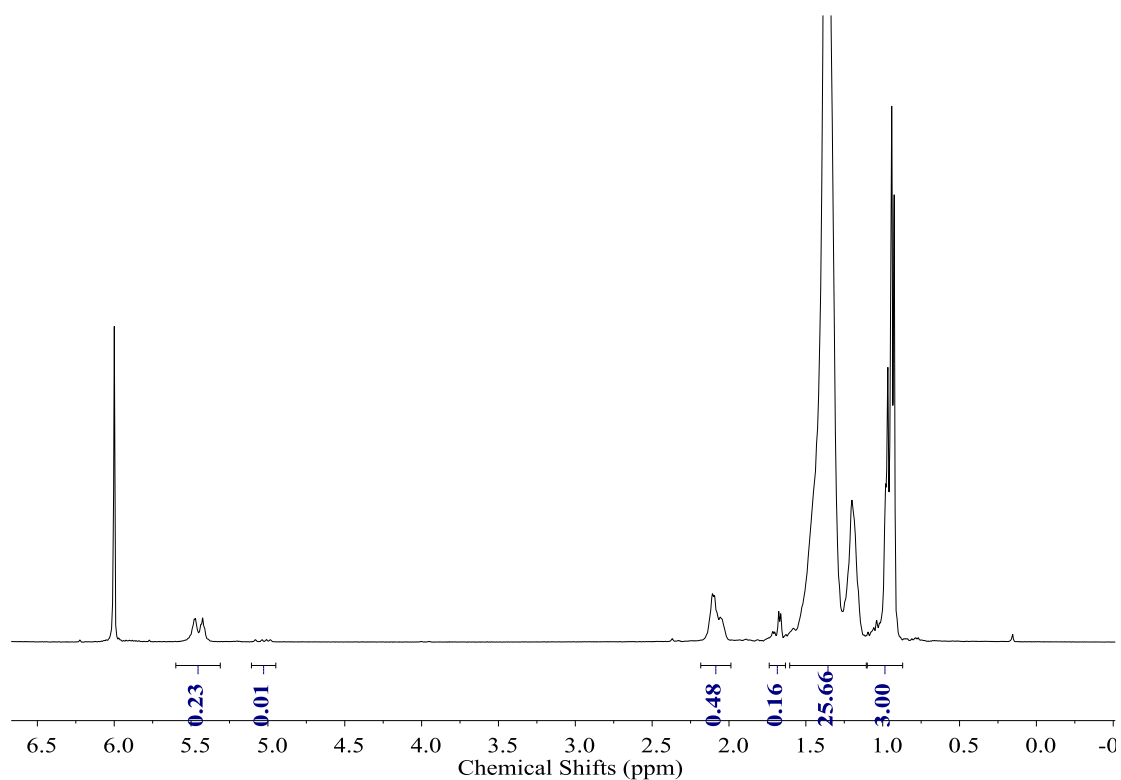

**Figure S34.**  $^1\text{H}$  NMR spectrum (400 MHz,  $\text{C}_2\text{D}_2\text{Cl}_4$ , 110  $^\circ\text{C}$ ) of the polyethylene generated by complex **Ni3** from table 3, entry 8.

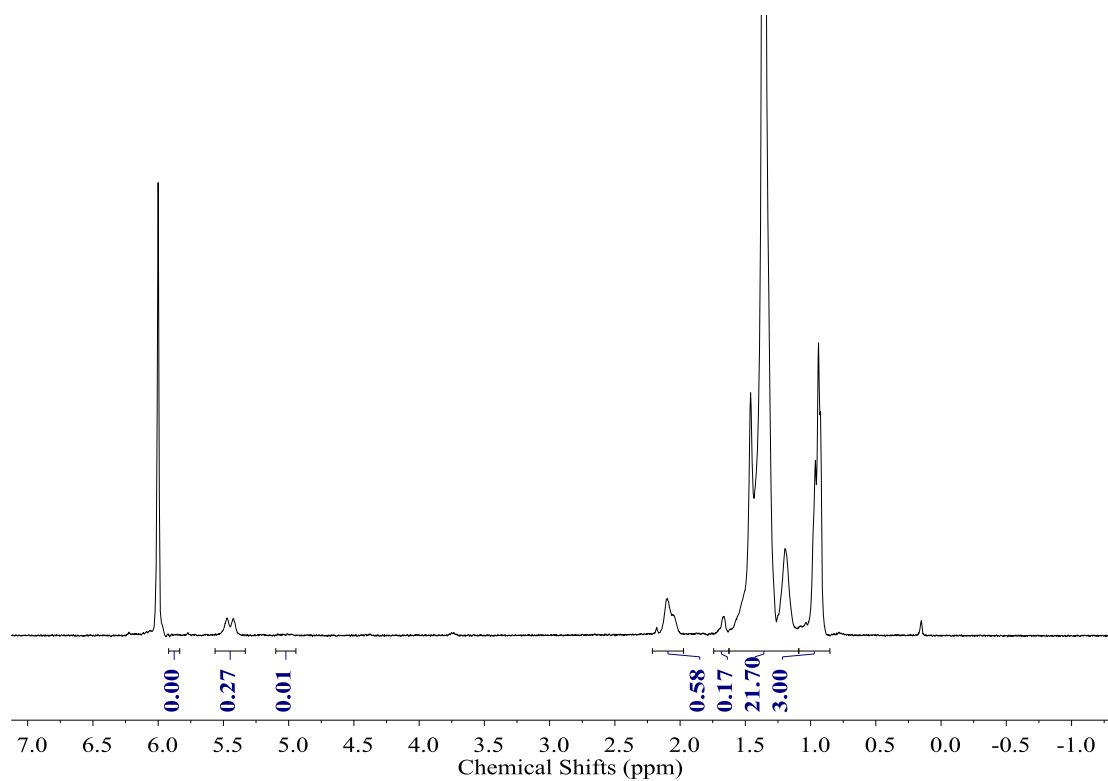

**Figure S35.**  $^1\text{H}$  NMR spectrum (400 MHz,  $\text{C}_2\text{D}_2\text{Cl}_4$ , 110  $^\circ\text{C}$ ) of the polyethylene generated by complex **Ni3** from table 3, entry 9.

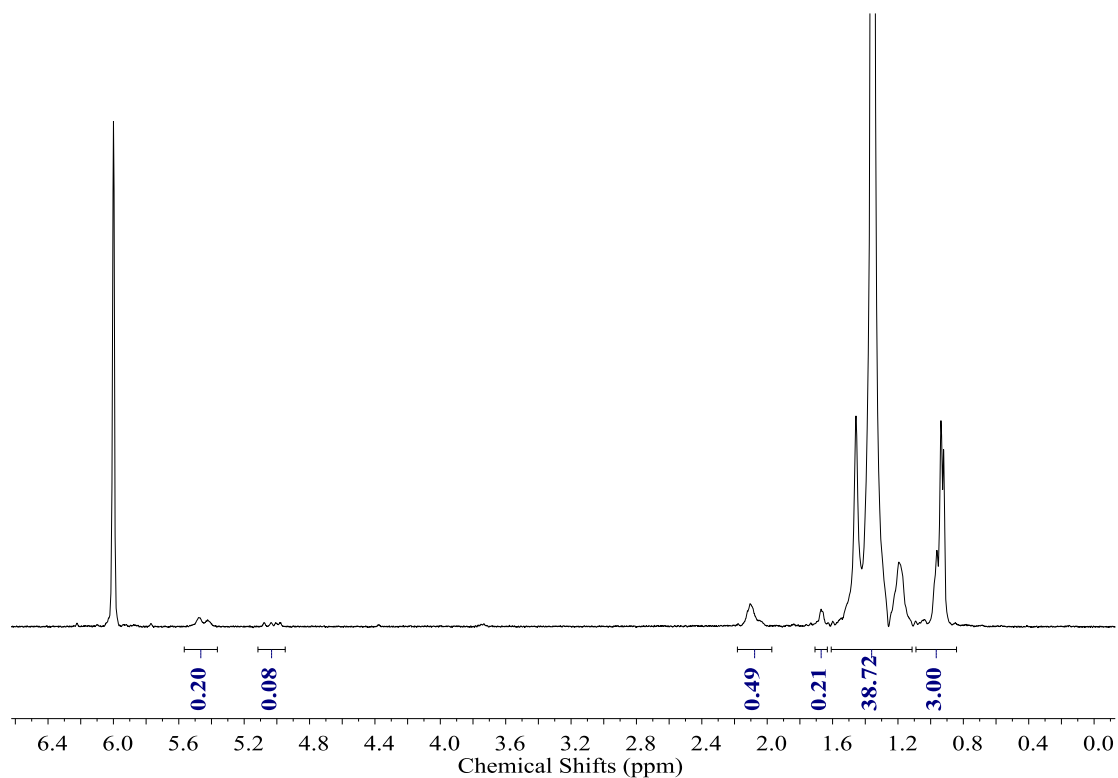

**Figure S36.**  $^1\text{H}$  NMR spectrum (400 MHz,  $\text{C}_2\text{D}_2\text{Cl}_4$ , 110  $^\circ\text{C}$ ) of the polyethylene generated by complex **Ni4** from table 3, entry 10.

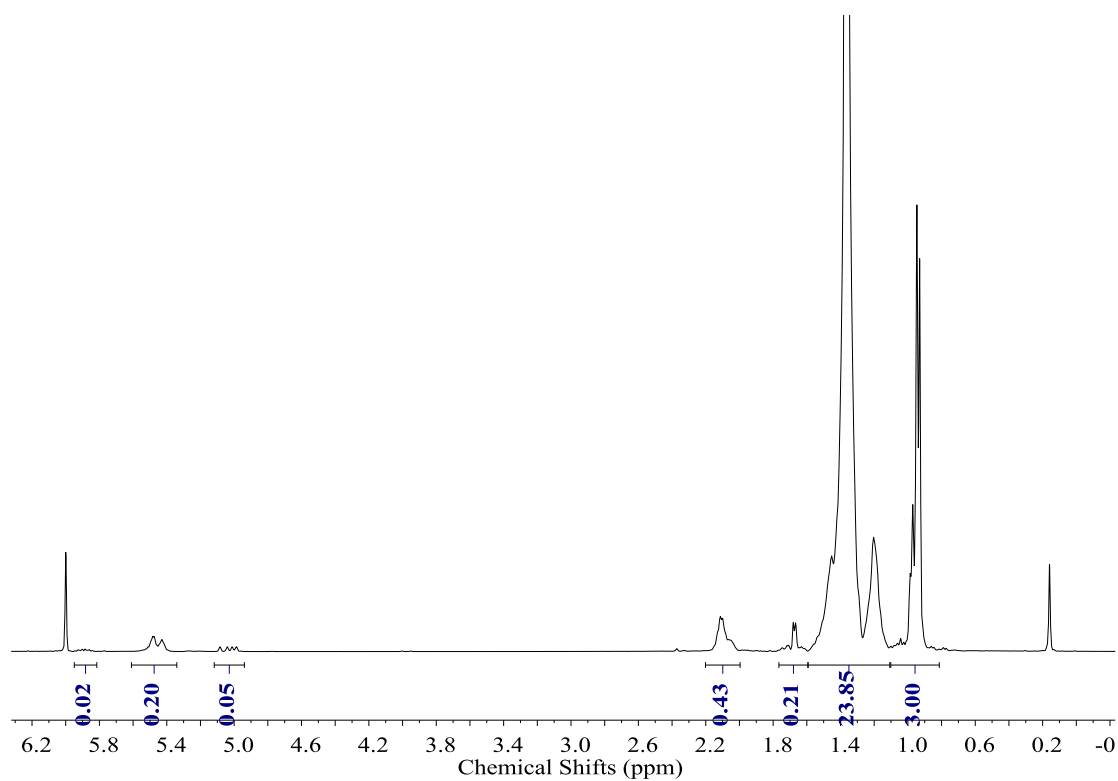

**Figure S37.**  $^1\text{H}$  NMR spectrum (400 MHz,  $\text{C}_2\text{D}_2\text{Cl}_4$ , 110  $^\circ\text{C}$ ) of the polyethylene generated by complex **Ni4** from table 3, entry 11.

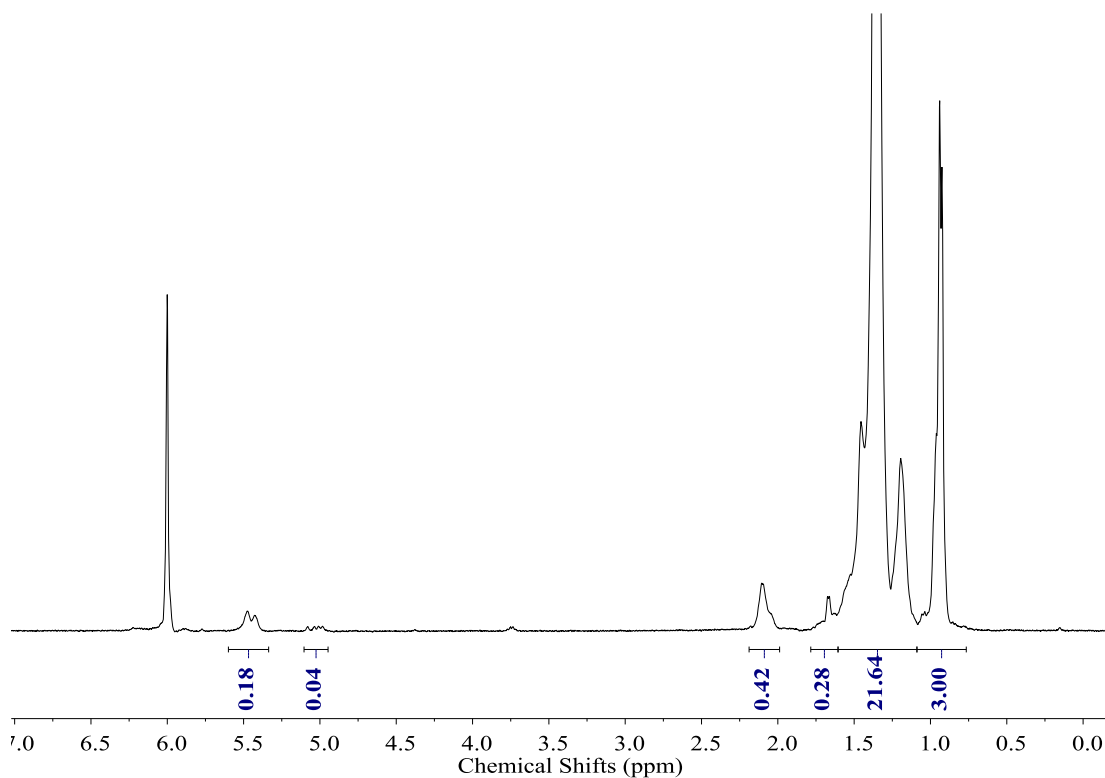

**Figure S38.**  $^1\text{H}$  NMR spectrum (400 MHz,  $\text{C}_2\text{D}_2\text{Cl}_4$ , 110  $^\circ\text{C}$ ) of the polyethylene generated by complex **Ni4** from table 3, entry 12.

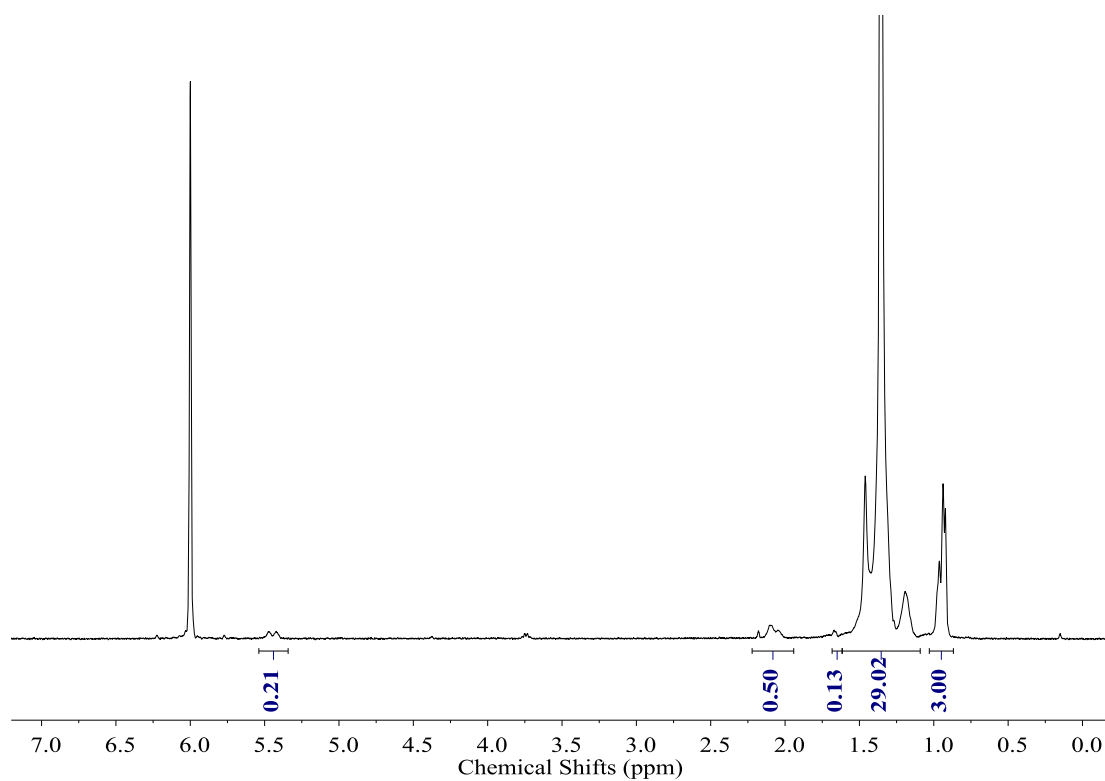

**Figure S39.**  $^1\text{H}$  NMR spectrum (400 MHz,  $\text{C}_2\text{D}_2\text{Cl}_4$ , 110  $^\circ\text{C}$ ) of the polyethylene generated by complex **Ni3** from table 5, entry 1.

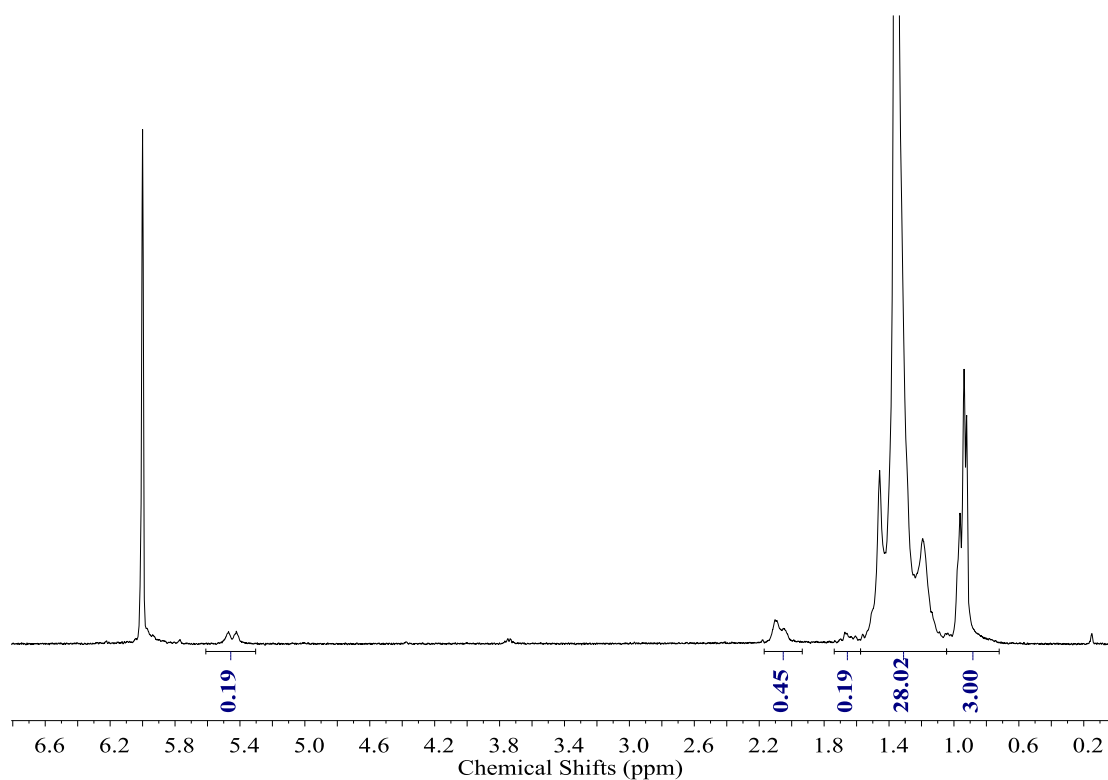

**Figure S40.**  $^1\text{H}$  NMR spectrum (400 MHz,  $\text{C}_2\text{D}_2\text{Cl}_4$ , 110  $^\circ\text{C}$ ) of the polyethylene generated by complex **Ni3** from table 5, entry 2.

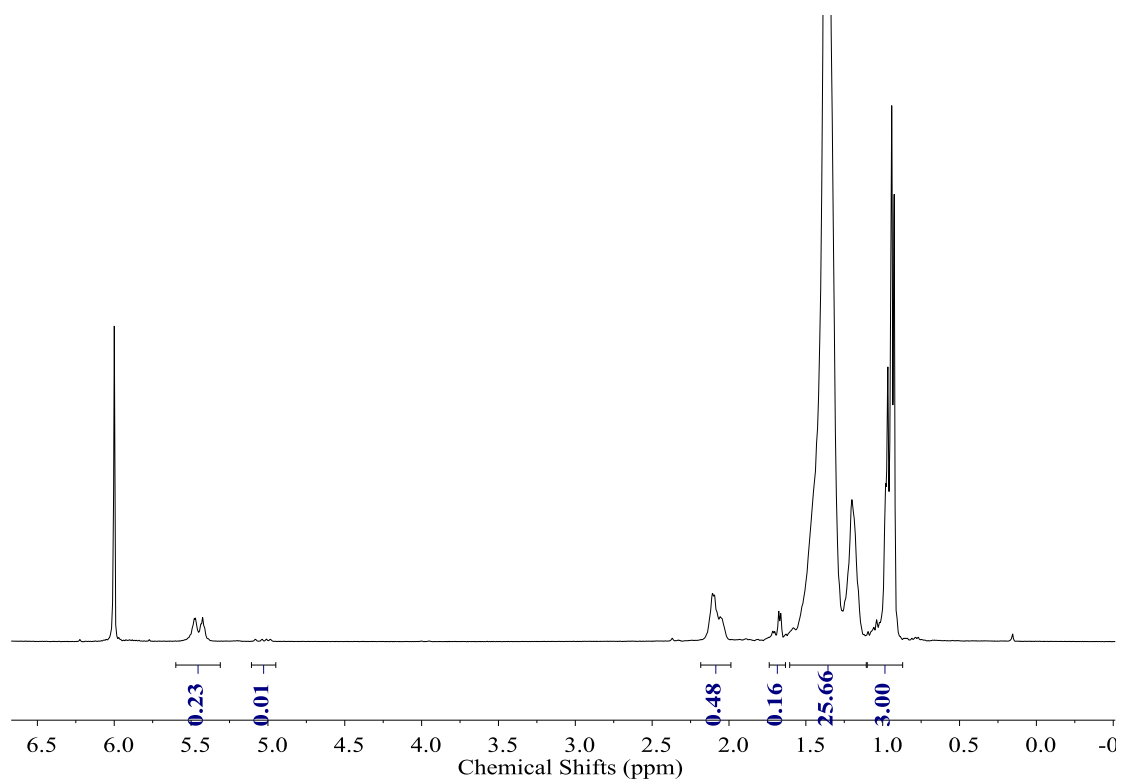

**Figure S41.**  $^1\text{H}$  NMR spectrum (400 MHz,  $\text{C}_2\text{D}_2\text{Cl}_4$ , 110  $^\circ\text{C}$ ) of the polyethylene generated by complex **Ni3** from table 5, entry 3.

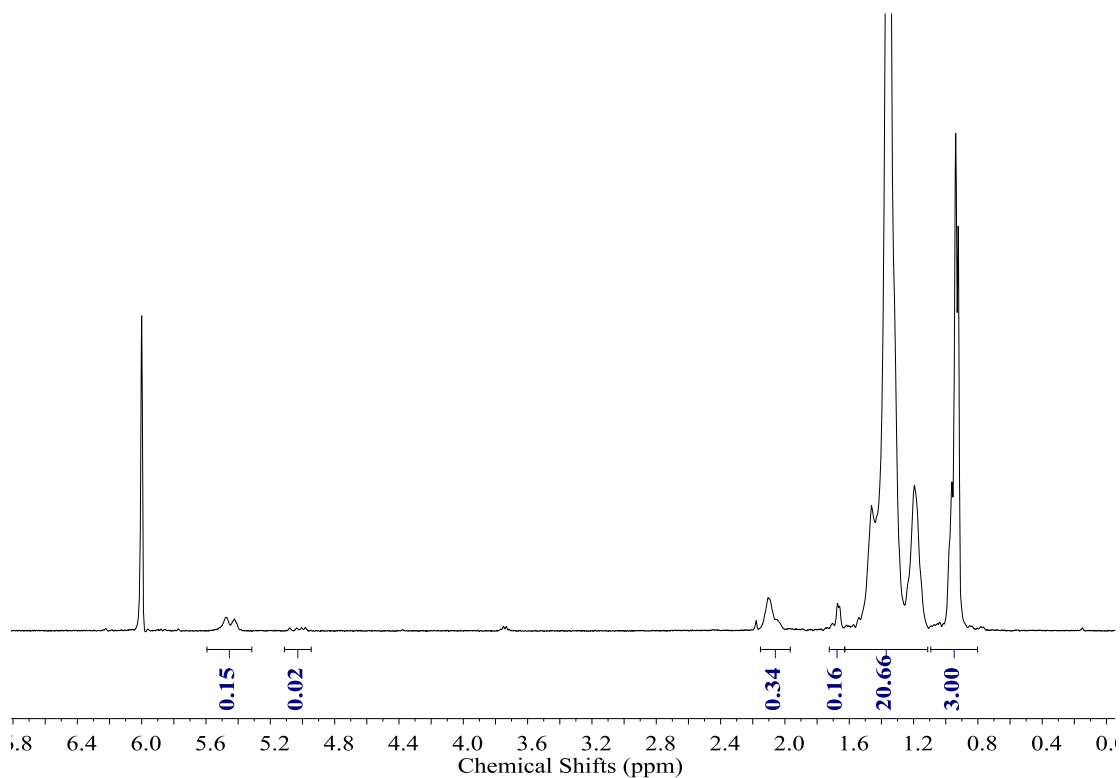

**Figure S42.**  $^1\text{H}$  NMR spectrum (400 MHz,  $\text{C}_2\text{D}_2\text{Cl}_4$ , 110  $^\circ\text{C}$ ) of the polyethylene generated by complex **Ni4** from table 5, entry 4.

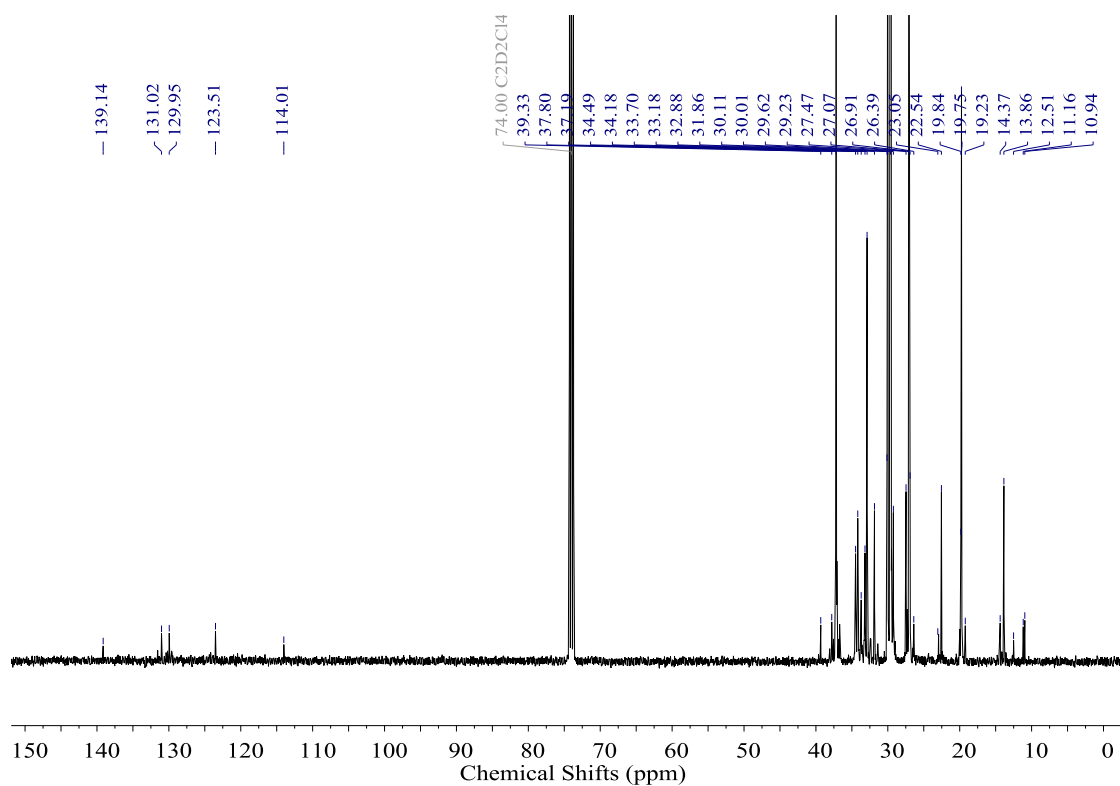

**Figure S43.**  $^{13}\text{C}$  NMR spectrum (400 MHz,  $\text{C}_2\text{D}_2\text{Cl}_4$ , 110  $^\circ\text{C}$ ) of the polyethylene generated by complex **Ni4** from table 5, entry 4.

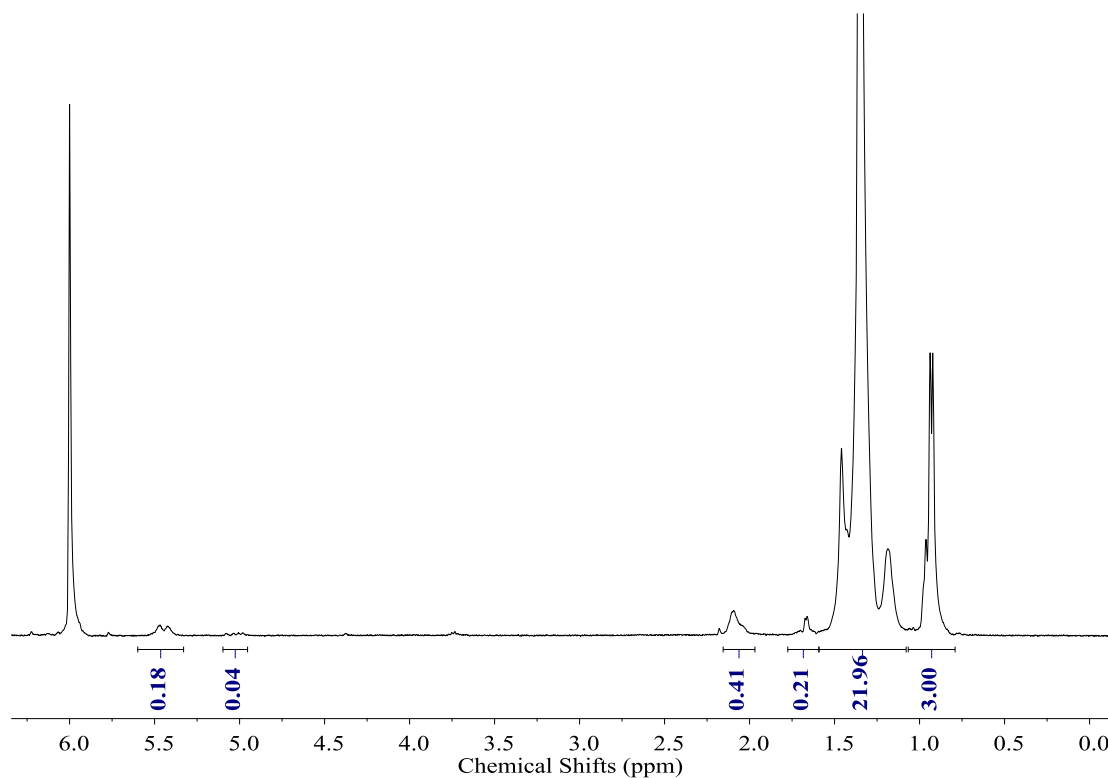

**Figure S44.**  $^1\text{H}$  NMR spectrum (400 MHz,  $\text{C}_2\text{D}_2\text{Cl}_4$ , 110  $^\circ\text{C}$ ) of the polyethylene generated by complex **Ni4** from table 5, entry 5.

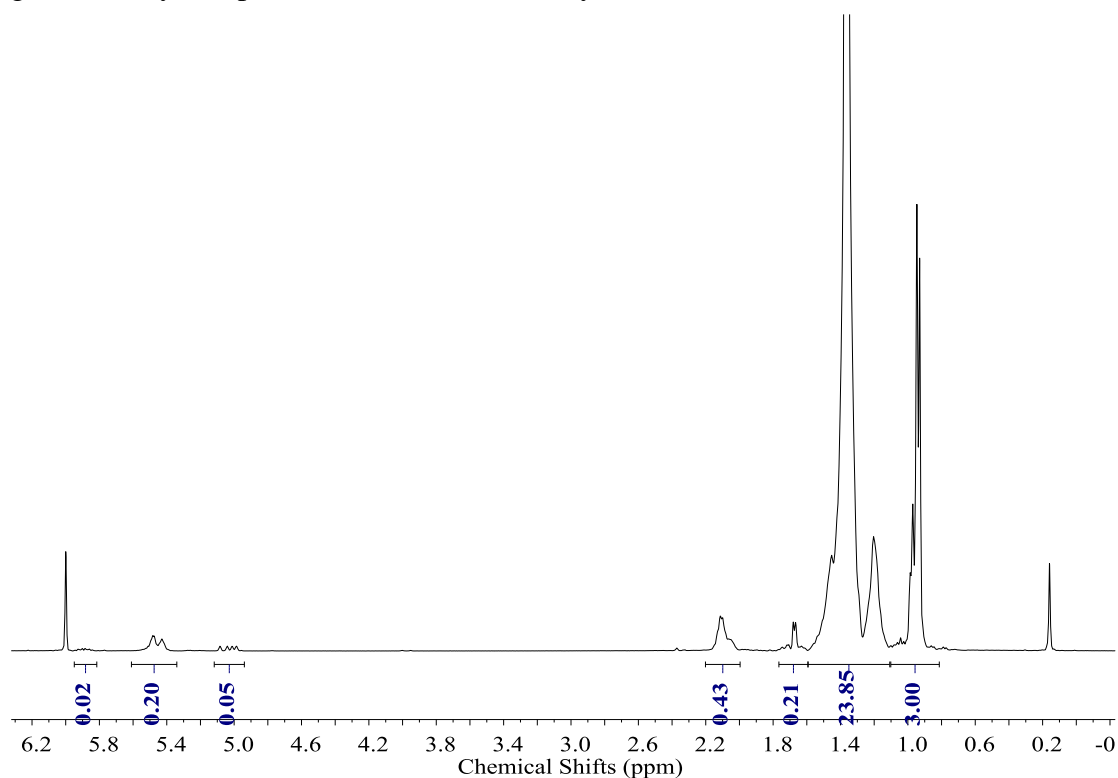

**Figure S45.**  $^1\text{H}$  NMR spectrum (400 MHz,  $\text{C}_2\text{D}_2\text{Cl}_4$ , 110  $^\circ\text{C}$ ) of the polyethylene generated by complex **Ni4** from table 5, entry 6.

## 6. GPC traces of polymers

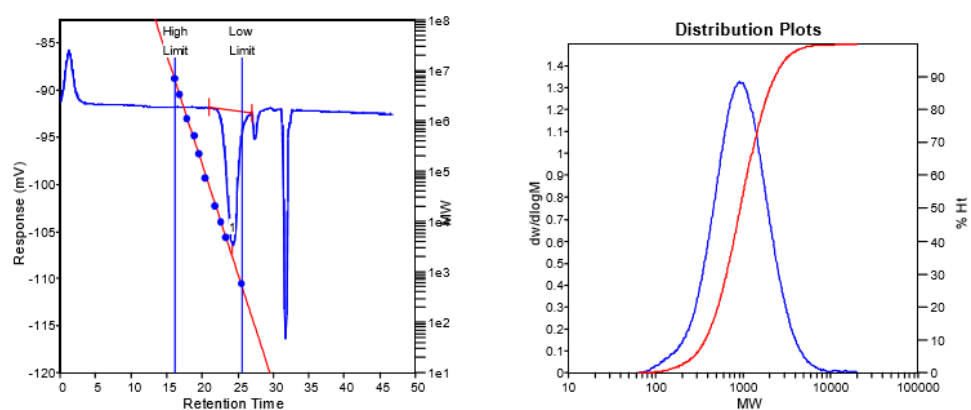

### MW Averages

| Peak No | Mp  | Mn  | Mw   | Mz   | Mz+1 | Mv   | PD     |
|---------|-----|-----|------|------|------|------|--------|
| 1       | 906 | 695 | 1202 | 2222 | 4902 | 1114 | 1.7295 |

### Processed Peaks

| Peak No | Name | Start RT (mins) | Max RT (mins) | End RT (mins) | Pk Height (mV) | % Height | Area (mV.secs) | % Area |
|---------|------|-----------------|---------------|---------------|----------------|----------|----------------|--------|
| 1       |      | 21.00           | 24.20         | 26.93         | -14.299        | 0        | 1539.39        | 100    |

**Figure S46.** GPC trace of the polymer from table 1, entry 1.

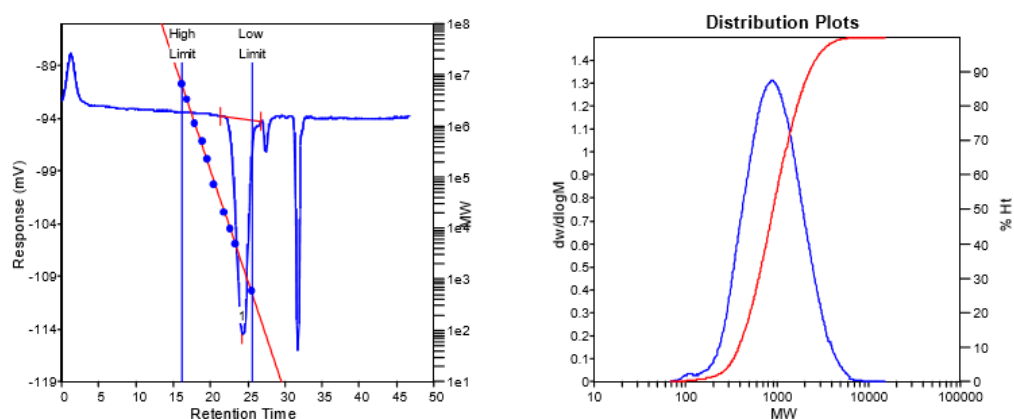

### MW Averages

| Peak No | Mp  | Mn  | Mw   | Mz   | Mz+1 | Mv   | PD      |
|---------|-----|-----|------|------|------|------|---------|
| 1       | 878 | 712 | 1146 | 1796 | 2666 | 1075 | 1.60955 |

### Processed Peaks

| Peak No | Name | Start RT (mins) | Max RT (mins) | End RT (mins) | Pk Height (mV) | % Height | Area (mV.secs) | % Area |
|---------|------|-----------------|---------------|---------------|----------------|----------|----------------|--------|
| 1       |      | 21.28           | 24.23         | 26.85         | -20.498        | 0        | 2233.02        | 100    |

**Figure S47.** GPC trace of the polymer from table 1, entry 2.

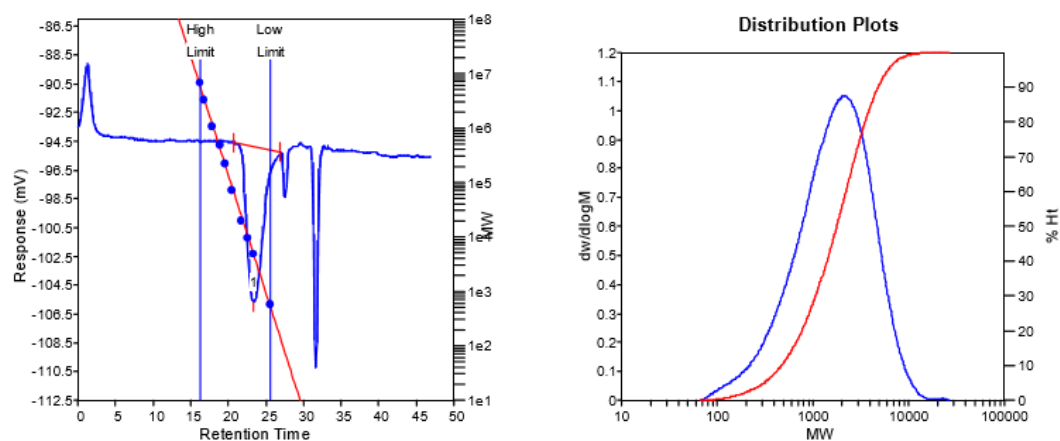

#### MW Averages

| Peak No | Mp   | Mn   | Mw   | Mz   | Mz+1 | Mv   | PD      |
|---------|------|------|------|------|------|------|---------|
| 1       | 2097 | 1006 | 2294 | 4014 | 6195 | 2099 | 2.28032 |

#### Processed Peaks

| Peak No | Name | Start RT (mins) | Max RT (mins) | End RT (mins) | Pk Height (mV) | % Height | Area (mV.secs) | % Area |
|---------|------|-----------------|---------------|---------------|----------------|----------|----------------|--------|
| 1       |      | 20.68           | 23.35         | 26.88         | -10.7928       | 100      | 1467.06        | 100    |

**Figure S48.** GPC trace of the polymer from table 1, entry 3.

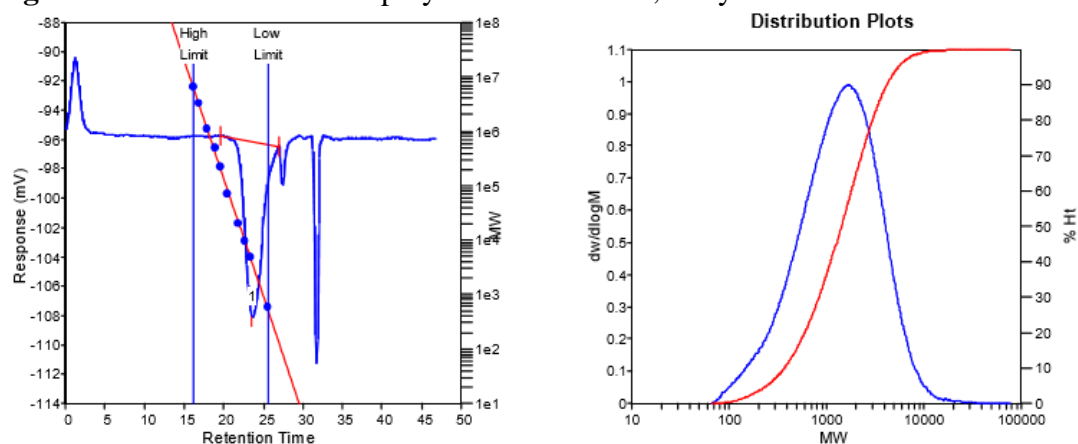

#### MW Averages

| Peak No | Mp   | Mn  | Mw   | Mz   | Mz+1 | Mv   | PD      |
|---------|------|-----|------|------|------|------|---------|
| 1       | 1700 | 816 | 1971 | 4041 | 8141 | 1774 | 2.41544 |

#### Processed Peaks

| Peak No | Name | Start RT (mins) | Max RT (mins) | End RT (mins) | Pk Height (mV) | % Height | Area (mV.secs) | % Area |
|---------|------|-----------------|---------------|---------------|----------------|----------|----------------|--------|
| 1       |      | 19.62           | 23.55         | 26.92         | -11.93         | 100      | 1722.09        | 100    |

**Figure S49.** GPC trace of the polymer from table 1, entry 4.



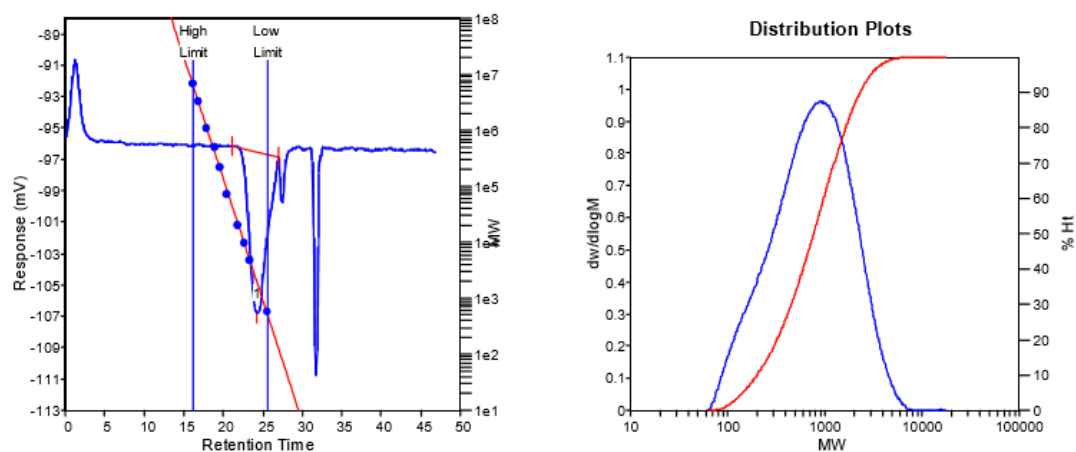

#### MW Averages

| Peak No | Mp  | Mn  | Mw   | Mz   | Mz+1 | Mv  | PD     |
|---------|-----|-----|------|------|------|-----|--------|
| 1       | 921 | 471 | 1050 | 1922 | 3023 | 954 | 2.2293 |

#### Processed Peaks

| Peak No | Name | Start RT (mins) | Max RT (mins) | End RT (mins) | Pk Height (mV) | % Height | Area (mV.secs) | % Area |
|---------|------|-----------------|---------------|---------------|----------------|----------|----------------|--------|
| 1       |      | 21.13           | 24.23         | 26.95         | -10.278        | 0        | 1526.47        | 100    |

**Figure S50.** GPC trace of the polymer from table 1, entry 5.

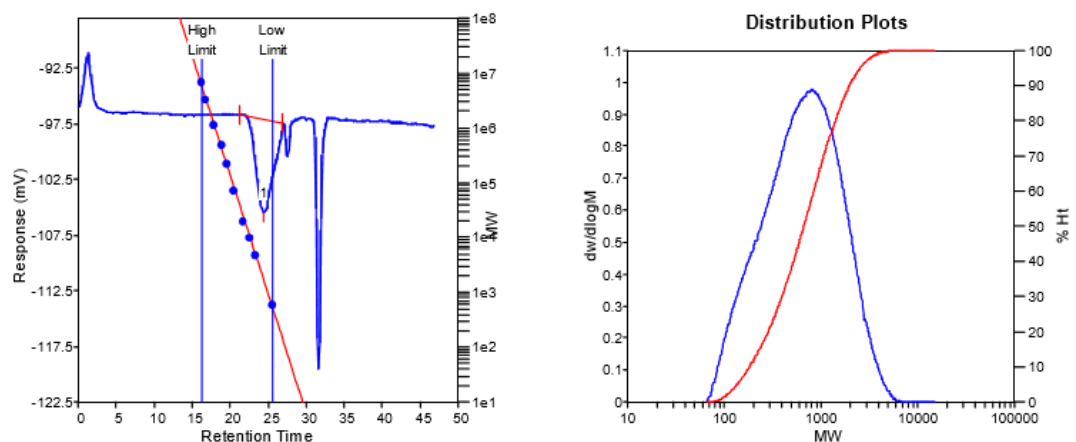

#### MW Averages

| Peak No | Mp  | Mn  | Mw  | Mz   | Mz+1 | Mv  | PD      |
|---------|-----|-----|-----|------|------|-----|---------|
| 1       | 810 | 427 | 905 | 1606 | 2340 | 825 | 2.11944 |

#### Processed Peaks

| Peak No | Name | Start RT (mins) | Max RT (mins) | End RT (mins) | Pk Height (mV) | % Height | Area (mV.secs) | % Area |
|---------|------|-----------------|---------------|---------------|----------------|----------|----------------|--------|
| 1       |      | 21.28           | 24.32         | 26.90         | -8.35041       | 100      | 1220.17        | 100    |

**Figure S51.** GPC trace of the polymer from table 1, entry 6.

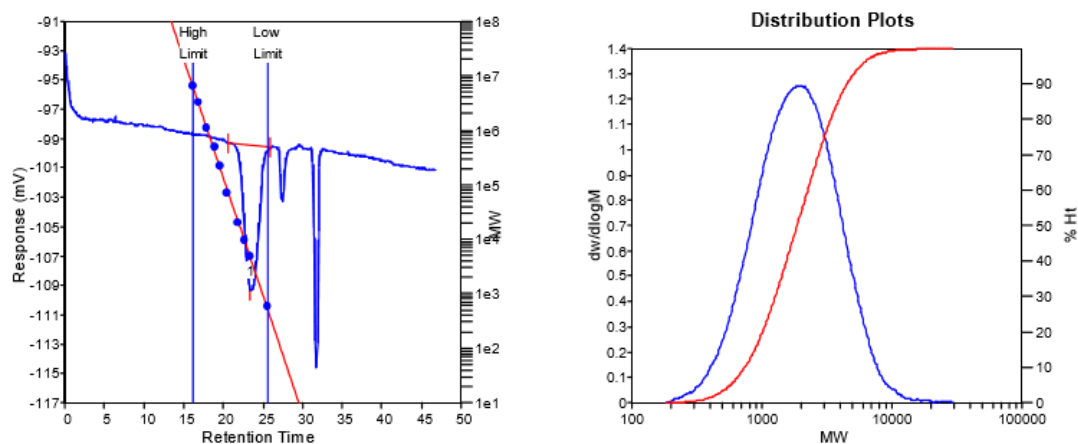

#### MW Averages

| Peak No | Mp   | Mn   | Mw   | Mz   | Mz+1 | Mv   | PD      |
|---------|------|------|------|------|------|------|---------|
| 1       | 1873 | 1432 | 2347 | 3837 | 6499 | 2194 | 1.63897 |

#### Processed Peaks

| Peak No | Name | Start RT (mins) | Max RT (mins) | End RT (mins) | Pk Height (mV) | % Height | Area (mV.secs) | % Area |
|---------|------|-----------------|---------------|---------------|----------------|----------|----------------|--------|
| 1       |      | 20.60           | 23.45         | 25.87         | -9.89857       | 100      | 1130.13        | 100    |

**Figure S52.** GPC trace of the polymer from table 1, entry 7.

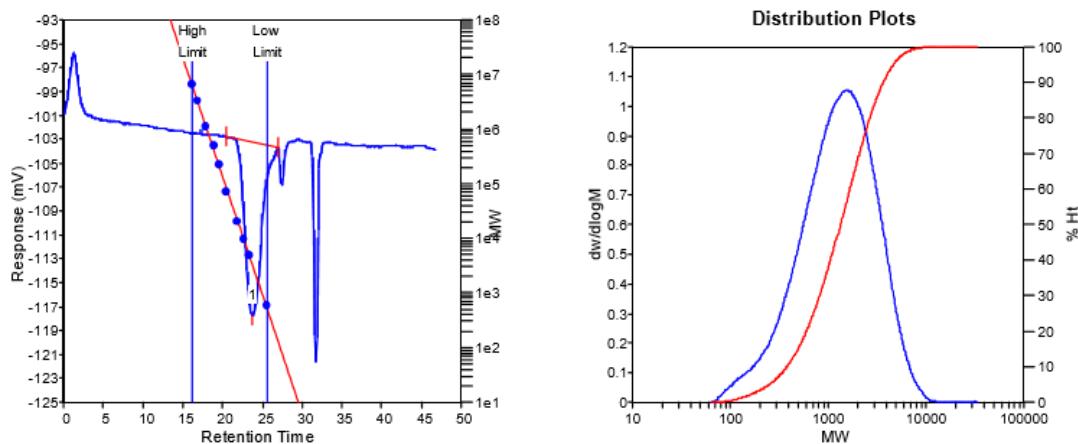

#### MW Averages

| Peak No | Mp   | Mn  | Mw   | Mz   | Mz+1 | Mv   | PD      |
|---------|------|-----|------|------|------|------|---------|
| 1       | 1519 | 801 | 1740 | 3023 | 4953 | 1596 | 2.17228 |

#### Processed Peaks

| Peak No | Name | Start RT (mins) | Max RT (mins) | End RT (mins) | Pk Height (mV) | % Height | Area (mV.secs) | % Area |
|---------|------|-----------------|---------------|---------------|----------------|----------|----------------|--------|
| 1       |      | 20.47           | 23.67         | 26.93         | -14.4433       | 100      | 1959.08        | 100    |

**Figure S53.** GPC trace of the polymer from table 1, entry 8.

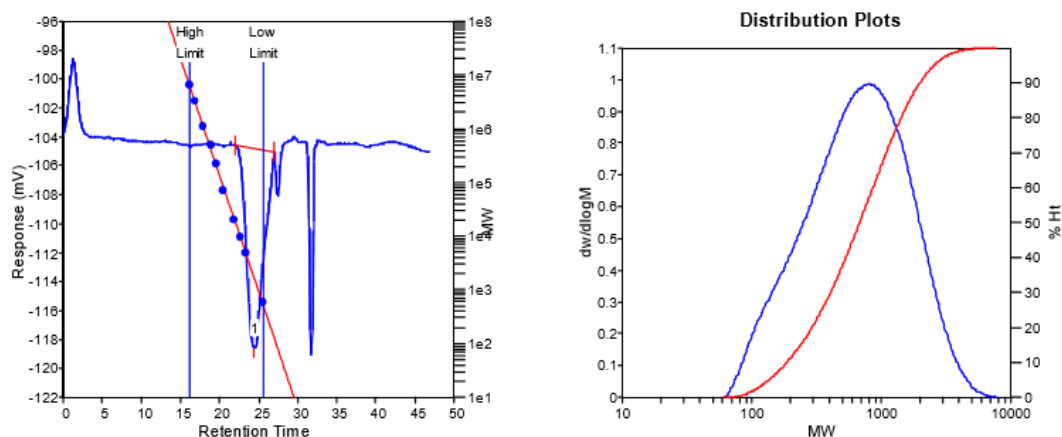

#### MW Averages

| Peak No | Mp  | Mn  | Mw  | Mz   | Mz+1 | Mv  | PD      |
|---------|-----|-----|-----|------|------|-----|---------|
| 1       | 797 | 431 | 917 | 1628 | 2402 | 836 | 2.12761 |

#### Processed Peaks

| Peak No | Name | Start RT (mins) | Max RT (mins) | End RT (mins) | Pk Height (mV) | % Height | Area (mV.secs) | % Area |
|---------|------|-----------------|---------------|---------------|----------------|----------|----------------|--------|
| 1       |      | 21.98           | 24.33         | 26.98         | -13.8186       | 100      | 2000.34        | 100    |

**Figure S54.** GPC trace of the polymer from table 1, entry 9.

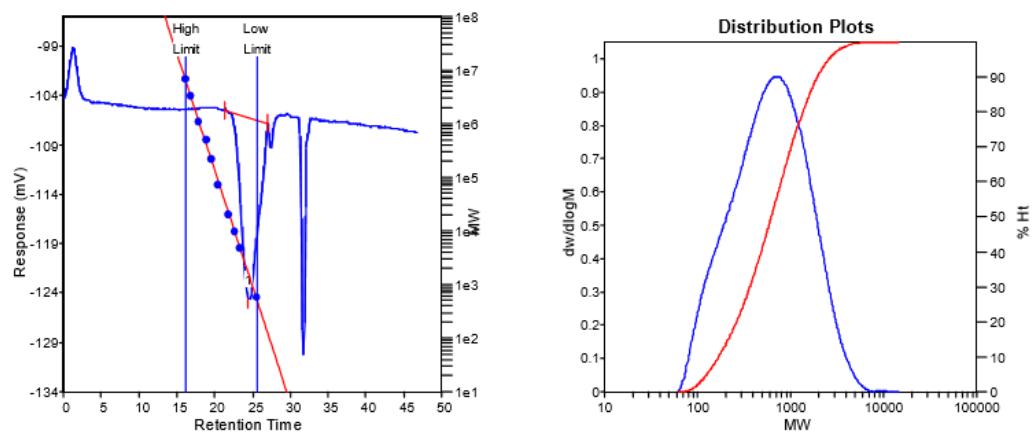

#### MW Averages

| Peak No | Mp  | Mn  | Mw  | Mz   | Mz+1 | Mv  | PD      |
|---------|-----|-----|-----|------|------|-----|---------|
| 1       | 689 | 397 | 879 | 1680 | 2686 | 794 | 2.21411 |

#### Processed Peaks

| Peak No | Name | Start RT (mins) | Max RT (mins) | End RT (mins) | Pk Height (mV) | % Height | Area (mV.secs) | % Area |
|---------|------|-----------------|---------------|---------------|----------------|----------|----------------|--------|
| 1       |      | 21.32           | 24.48         | 26.98         | -18.3311       | 100      | 2765.46        | 100    |

**Figure S55.** GPC trace of the polymer from table 1, entry 10.

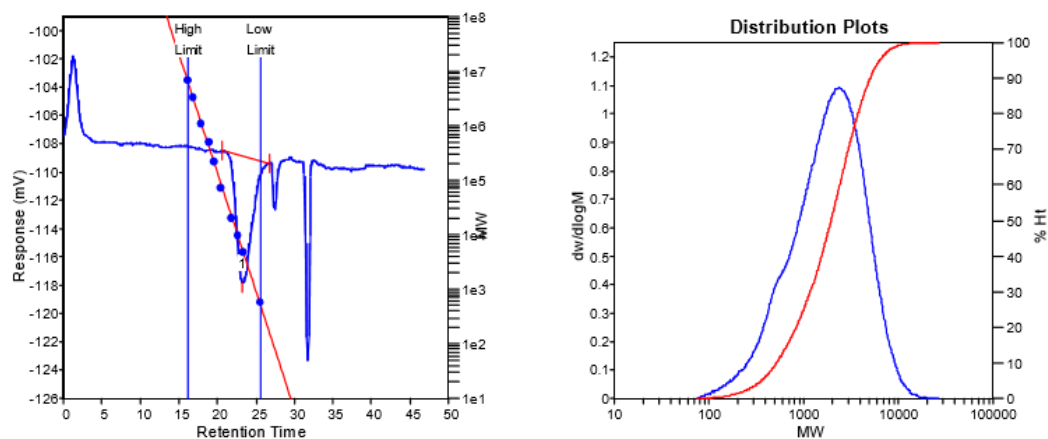

#### MW Averages

| Peak No | Mp   | Mn   | Mw   | Mz   | Mz+1 | Mv   | PD      |
|---------|------|------|------|------|------|------|---------|
| 1       | 2347 | 1130 | 2441 | 4078 | 5866 | 2246 | 2.16018 |

#### Processed Peaks

| Peak No | Name | Start RT (mins) | Max RT (mins) | End RT (mins) | Pk Height (mV) | % Height | Area (mV.secs) | % Area |
|---------|------|-----------------|---------------|---------------|----------------|----------|----------------|--------|
| 1       |      | 20.68           | 23.22         | 26.77         | -9.01022       | 100      | 1178.48        | 100    |

**Figure S56.** GPC trace of the polymer from table 1, entry 11.

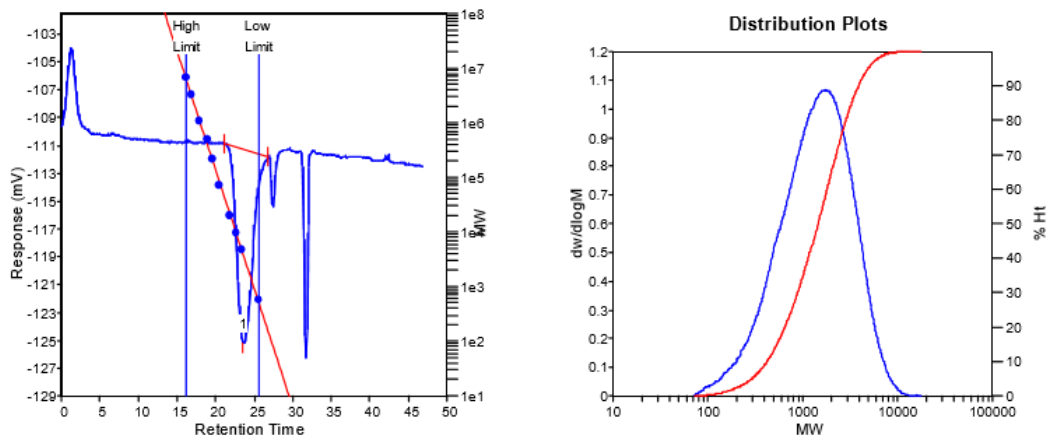

#### MW Averages

| Peak No | Mp   | Mn  | Mw   | Mz   | Mz+1 | Mv   | PD     |
|---------|------|-----|------|------|------|------|--------|
| 1       | 1700 | 891 | 1858 | 3104 | 4432 | 1711 | 2.0853 |

#### Processed Peaks

| Peak No | Name | Start RT (mins) | Max RT (mins) | End RT (mins) | Pk Height (mV) | % Height | Area (mV.secs) | % Area |
|---------|------|-----------------|---------------|---------------|----------------|----------|----------------|--------|
| 1       |      | 21.13           | 23.55         | 26.82         | -13.9199       | 100      | 1865.92        | 100    |

**Figure S57.** GPC trace of the polymer from table 1, entry 12.

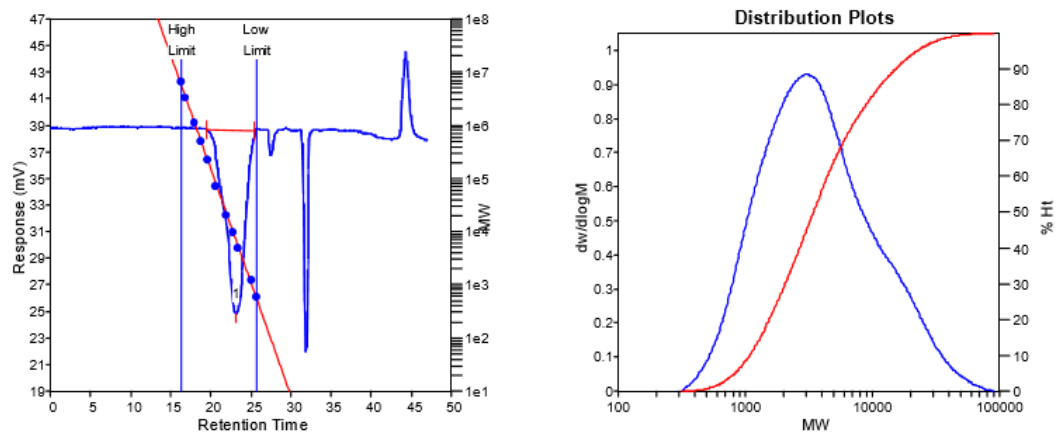

#### MW Averages

| Peak No | Mp   | Mn   | Mw   | Mz    | Mz+1  | Mv   | PD      |
|---------|------|------|------|-------|-------|------|---------|
| 1       | 2938 | 2397 | 6263 | 16467 | 30118 | 5406 | 2.61285 |

#### Processed Peaks

| Peak No | Name | Start RT (mins) | Max RT (mins) | End RT (mins) | Pk Height (mV) | % Height | Area (mV.secs) | % Area |
|---------|------|-----------------|---------------|---------------|----------------|----------|----------------|--------|
| 1       |      | 19.53           | 23.13         | 25.48         | -13.7899       | 100      | 2152.67        | 100    |

**Figure S58.** GPC trace of the polymer from table 1, entry 13.

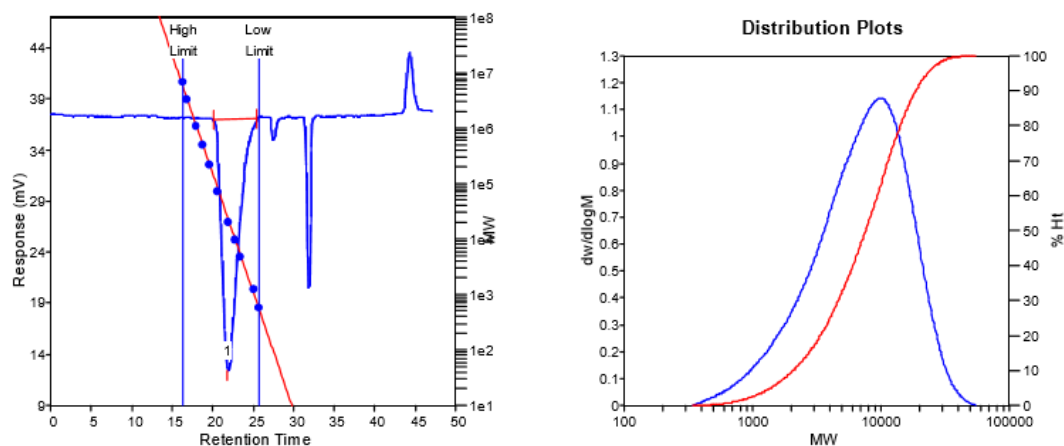

#### MW Averages

| Peak No | Mp    | Mn   | Mw   | Mz    | Mz+1  | Mv   | PD      |
|---------|-------|------|------|-------|-------|------|---------|
| 1       | 10125 | 4467 | 9221 | 14520 | 19597 | 8551 | 2.06425 |

#### Processed Peaks

| Peak No | Name | Start RT (mins) | Max RT (mins) | End RT (mins) | Pk Height (mV) | % Height | Area (mV.secs) | % Area |
|---------|------|-----------------|---------------|---------------|----------------|----------|----------------|--------|
| 1       |      | 20.05           | 21.83         | 25.40         | -24.5411       | 100      | 3117.15        | 100    |

**Figure S59.** GPC trace of the polymer from table 1, entry 14.

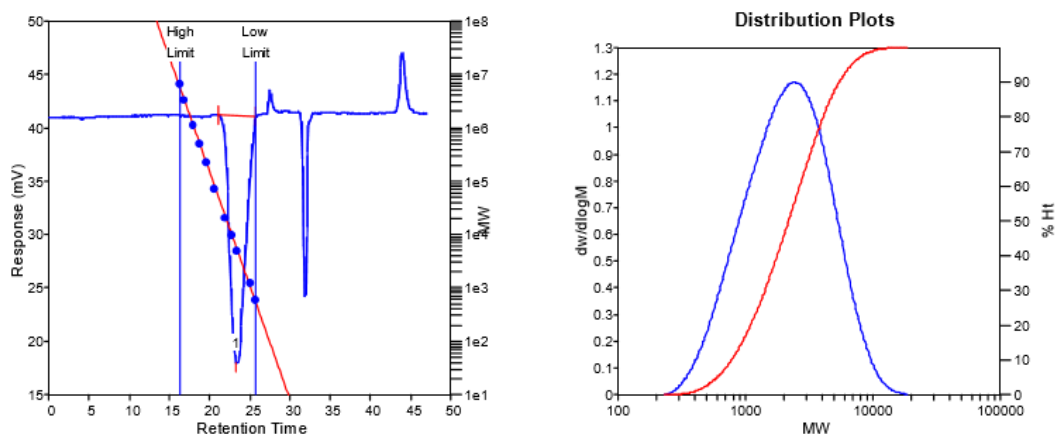

#### MW Averages

| Peak No | Mp   | Mn   | Mw   | Mz   | Mz+1 | Mv   | PD      |
|---------|------|------|------|------|------|------|---------|
| 1       | 2428 | 1599 | 2721 | 4247 | 5931 | 2542 | 1.70169 |

#### Processed Peaks

| Peak No | Name | Start RT (mins) | Max RT (mins) | End RT (mins) | Pk Height (mV) | % Height | Area (mV.secs) | % Area |
|---------|------|-----------------|---------------|---------------|----------------|----------|----------------|--------|
| 1       |      | 21.20           | 23.33         | 25.80         | -23.1662       | 100      | 2874.4         | 100    |

**Figure S60.** GPC trace of the polymer from table 2, entry 1.

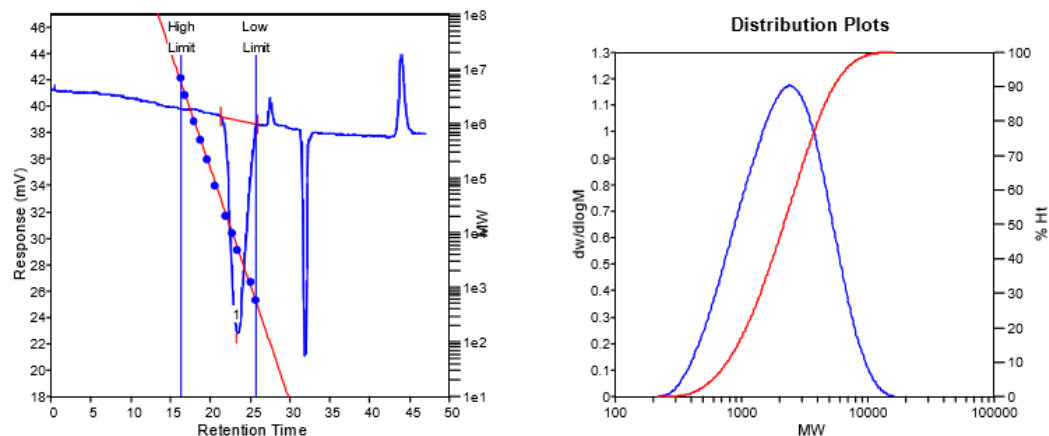

#### MW Averages

| Peak No | Mp   | Mn   | Mw   | Mz   | Mz+1 | Mv   | PD      |
|---------|------|------|------|------|------|------|---------|
| 1       | 2428 | 1583 | 2688 | 4154 | 5705 | 2514 | 1.69804 |

#### Processed Peaks

| Peak No | Name | Start RT (mins) | Max RT (mins) | End RT (mins) | Pk Height (mV) | % Height | Area (mV.secs) | % Area |
|---------|------|-----------------|---------------|---------------|----------------|----------|----------------|--------|
| 1       |      | 21.33           | 23.33         | 25.85         | -16.096        | 100      | 1990.22        | 100    |

**Figure S61.** GPC trace of the polymer from table 2, entry 2.

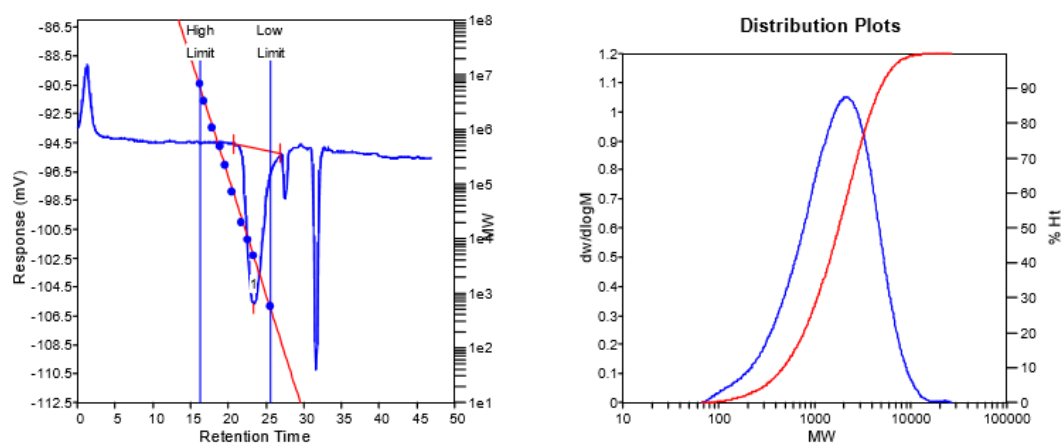

#### MW Averages

| Peak No | Mp   | Mn   | Mw   | Mz   | Mz+1 | Mv   | PD      |
|---------|------|------|------|------|------|------|---------|
| 1       | 2097 | 1006 | 2294 | 4014 | 6195 | 2099 | 2.28032 |

#### Processed Peaks

| Peak No | Name | Start RT (mins) | Max RT (mins) | End RT (mins) | Pk Height (mV) | % Height | Area (mV.secs) | % Area |
|---------|------|-----------------|---------------|---------------|----------------|----------|----------------|--------|
| 1       |      | 20.68           | 23.35         | 26.88         | -10.7928       | 100      | 1467.06        | 100    |

**Figure S62.** GPC trace of the polymer from table 2, entry 3.

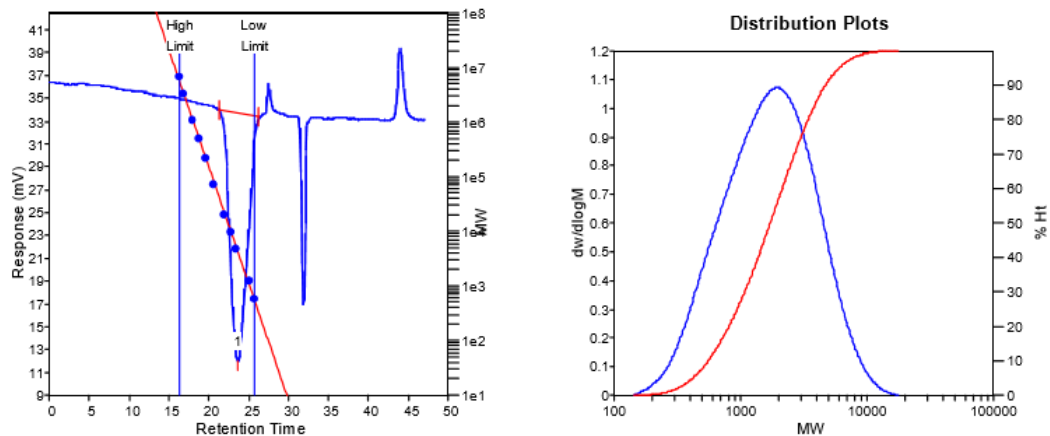

#### MW Averages

| Peak No | Mp   | Mn   | Mw   | Mz   | Mz+1 | Mv   | PD      |
|---------|------|------|------|------|------|------|---------|
| 1       | 1945 | 1190 | 2258 | 3823 | 5603 | 2082 | 1.89748 |

#### Processed Peaks

| Peak No | Name | Start RT (mins) | Max RT (mins) | End RT (mins) | Pk Height (mV) | % Height | Area (mV.secs) | % Area |
|---------|------|-----------------|---------------|---------------|----------------|----------|----------------|--------|
| 1       |      | 21.25           | 23.57         | 26.32         | -21.7391       | 100      | 2942.45        | 100    |

**Figure S63.** GPC trace of the polymer from table 2, entry 4.

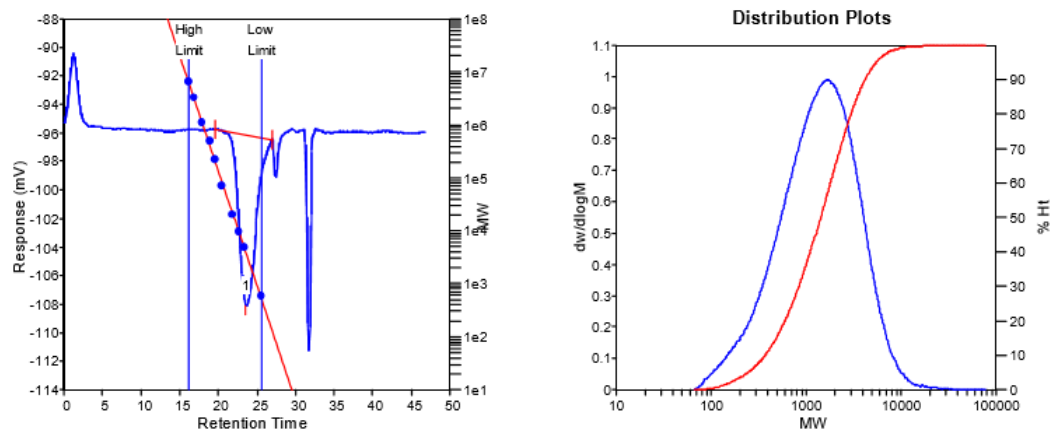

#### MW Averages

| Peak No | Mp   | Mn  | Mw   | Mz   | Mz+1 | Mv   | PD      |
|---------|------|-----|------|------|------|------|---------|
| 1       | 1700 | 816 | 1971 | 4041 | 8141 | 1774 | 2.41544 |

#### Processed Peaks

| Peak No | Name | Start RT (mins) | Max RT (mins) | End RT (mins) | Pk Height (mV) | % Height | Area (mV.secs) | % Area |
|---------|------|-----------------|---------------|---------------|----------------|----------|----------------|--------|
| 1       |      | 19.62           | 23.55         | 26.92         | -11.93         | 100      | 1722.09        | 100    |

**Figure S64.** GPC trace of the polymer from table 2, entry 5.

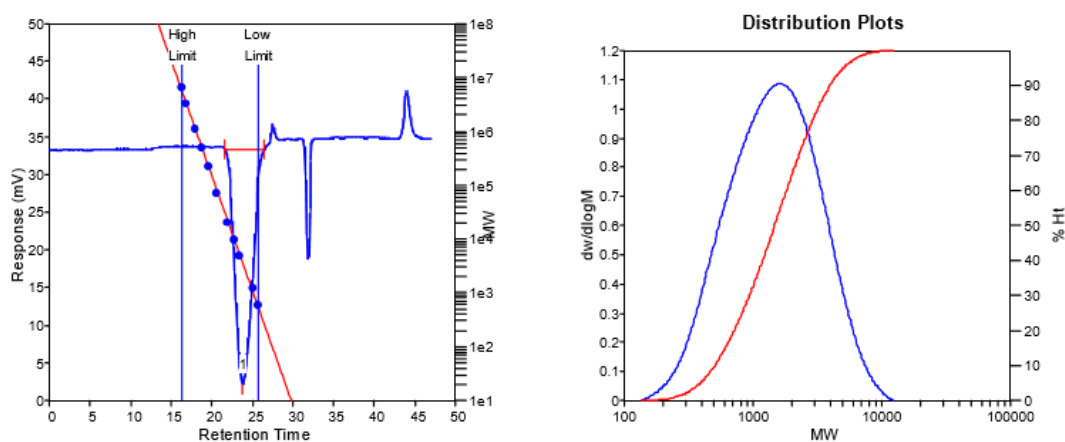

#### MW Averages

| Peak No | Mp   | Mn   | Mw   | Mz   | Mz+1 | Mv   | PD      |
|---------|------|------|------|------|------|------|---------|
| 1       | 1608 | 1054 | 1915 | 3149 | 4494 | 1774 | 1.81689 |

#### Processed Peaks

| Peak No | Name | Start RT (mins) | Max RT (mins) | End RT (mins) | Pk Height (mV) | % Height | Area (mV.secs) | % Area |
|---------|------|-----------------|---------------|---------------|----------------|----------|----------------|--------|
| 1       |      | 21.62           | 23.77         | 26.37         | -31.0933       | 100      | 4155.27        | 100    |

**Figure S65.** GPC trace of the polymer from table 2, entry 6.



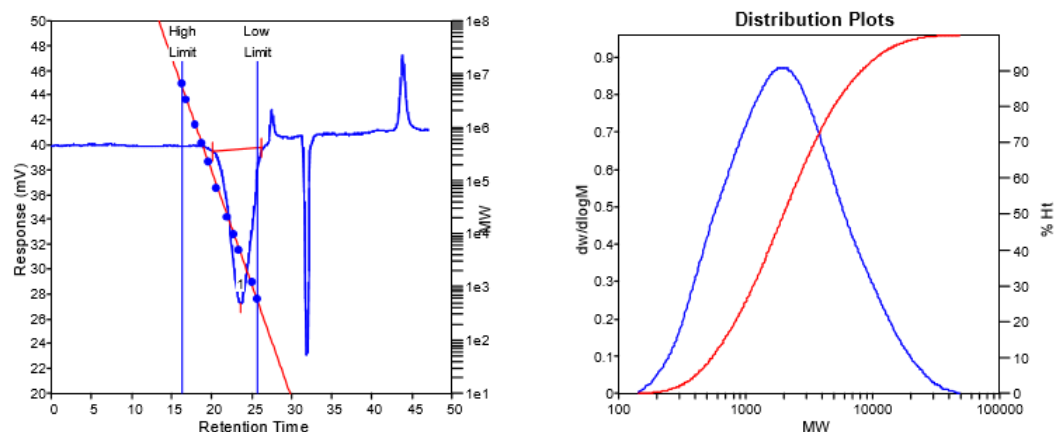

#### MW Averages

| Peak No | Mp   | Mn   | Mw   | Mz   | Mz+1  | Mv   | PD     |
|---------|------|------|------|------|-------|------|--------|
| 1       | 1884 | 1264 | 3453 | 8759 | 15890 | 2992 | 2.7318 |

#### Processed Peaks

| Peak No | Name | Start RT (mins) | Max RT (mins) | End RT (mins) | Pk Height (mV) | % Height | Area (mV.secs) | % Area |
|---------|------|-----------------|---------------|---------------|----------------|----------|----------------|--------|
| 1       |      | 20.18           | 23.60         | 26.32         | -12.4256       | 100      | 2065.79        | 100    |

**Figure S66.** GPC trace of the polymer from table 3, entry 1.

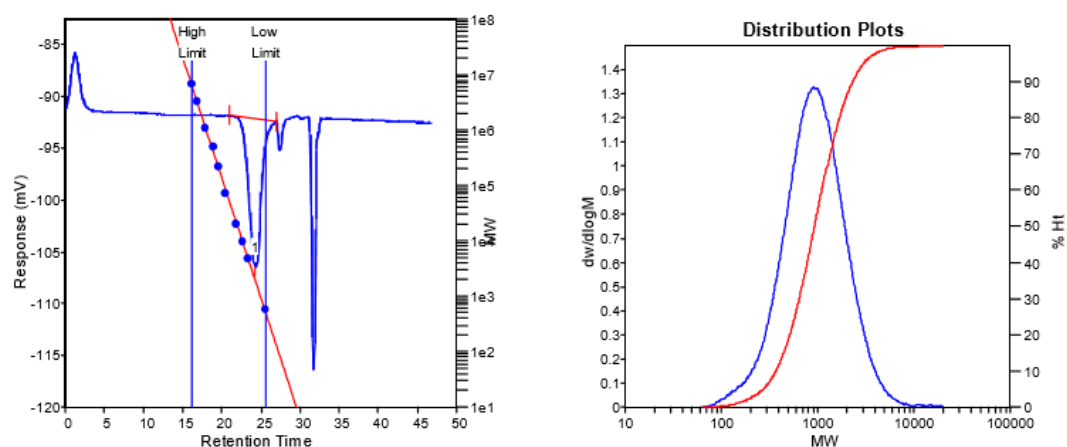

#### MW Averages

| Peak No | Mp  | Mn  | Mw   | Mz   | Mz+1 | Mv   | PD     |
|---------|-----|-----|------|------|------|------|--------|
| 1       | 906 | 695 | 1202 | 2222 | 4902 | 1114 | 1.7295 |

#### Processed Peaks

| Peak No | Name | Start RT (mins) | Max RT (mins) | End RT (mins) | Pk Height (mV) | % Height | Area (mV.secs) | % Area |
|---------|------|-----------------|---------------|---------------|----------------|----------|----------------|--------|
| 1       |      | 21.00           | 24.20         | 26.93         | -14.299        | 0        | 1539.39        | 100    |

**Figure S67.** GPC trace of the polymer from table 3, entry 2.

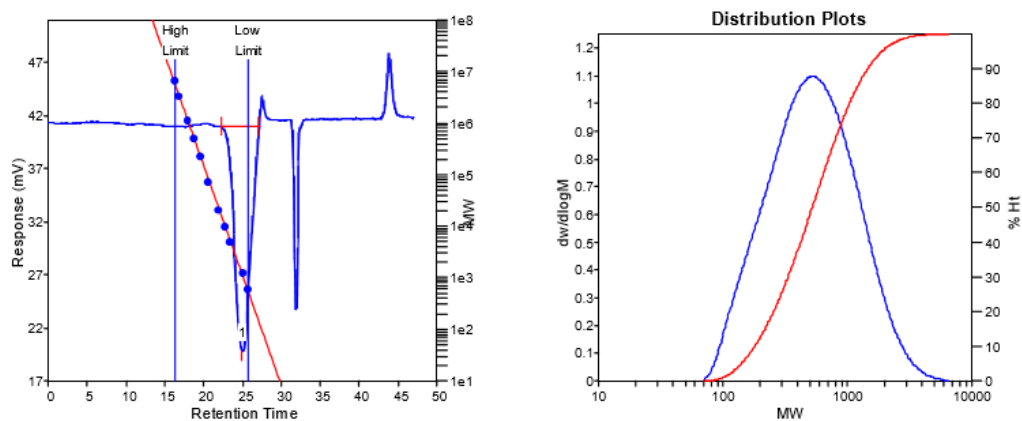

#### MW Averages

| Peak No | Mp  | Mn  | Mw  | Mz   | Mz+1 | Mv  | PD      |
|---------|-----|-----|-----|------|------|-----|---------|
| 1       | 521 | 383 | 699 | 1224 | 1902 | 644 | 1.82507 |

#### Processed Peaks

| Peak No | Name | Start RT (mins) | Max RT (mins) | End RT (mins) | Pk Height (mV) | % Height | Area (mV.secs) | % Area |
|---------|------|-----------------|---------------|---------------|----------------|----------|----------------|--------|
| 1       |      | 22.30           | 24.95         | 27.05         | -21.1471       | 100      | 2795.72        | 100    |

**Figure S68.** GPC trace of the polymer from table 3, entry 3.

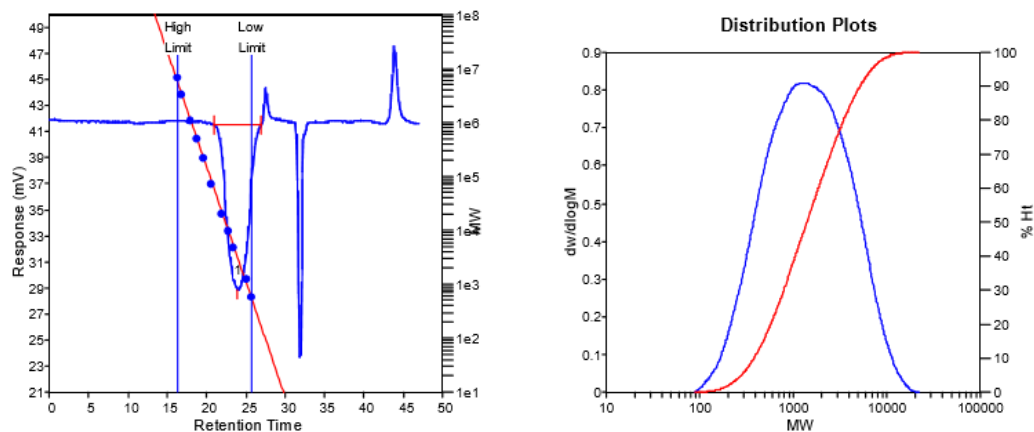

#### MW Averages

| Peak No | Mp   | Mn  | Mw   | Mz   | Mz+1 | Mv   | PD      |
|---------|------|-----|------|------|------|------|---------|
| 1       | 1267 | 871 | 2199 | 4553 | 7090 | 1953 | 2.52468 |

#### Processed Peaks

| Peak No | Name | Start RT (mins) | Max RT (mins) | End RT (mins) | Pk Height (mV) | % Height | Area (mV.secs) | % Area |
|---------|------|-----------------|---------------|---------------|----------------|----------|----------------|--------|
| 1       |      | 21.02           | 23.93         | 26.82         | -12.643        | 100      | 2242.29        | 100    |

**Figure S69.** GPC trace of the polymer from table 3, entry 4.

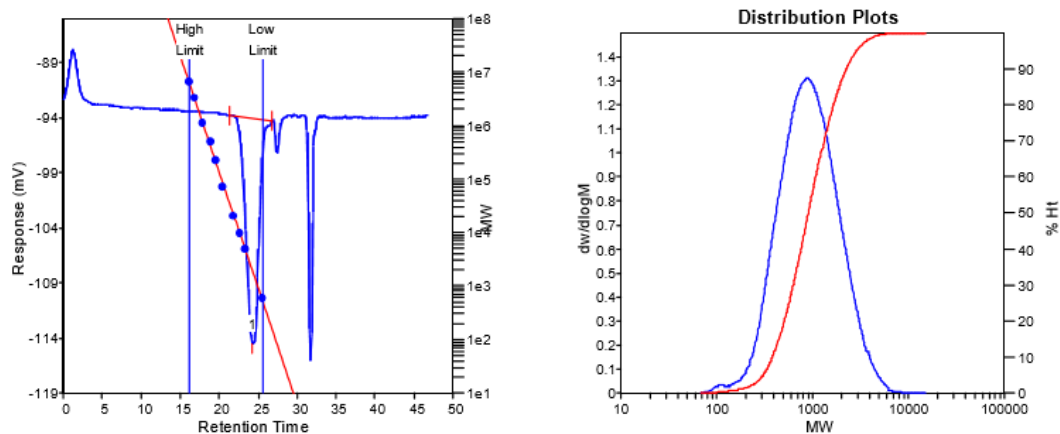

#### MW Averages

| Peak No | Mp  | Mn  | Mw   | Mz   | Mz+1 | Mv   | PD      |
|---------|-----|-----|------|------|------|------|---------|
| 1       | 878 | 712 | 1146 | 1796 | 2666 | 1075 | 1.60955 |

#### Processed Peaks

| Peak No | Name | Start RT (mins) | Max RT (mins) | End RT (mins) | Pk Height (mV) | % Height | Area (mV.secs) | % Area |
|---------|------|-----------------|---------------|---------------|----------------|----------|----------------|--------|
| 1       |      | 21.28           | 24.23         | 26.85         | -20.498        | 0        | 2233.02        | 100    |

**Figure S70.** GPC trace of the polymer from table 3, entry 5.

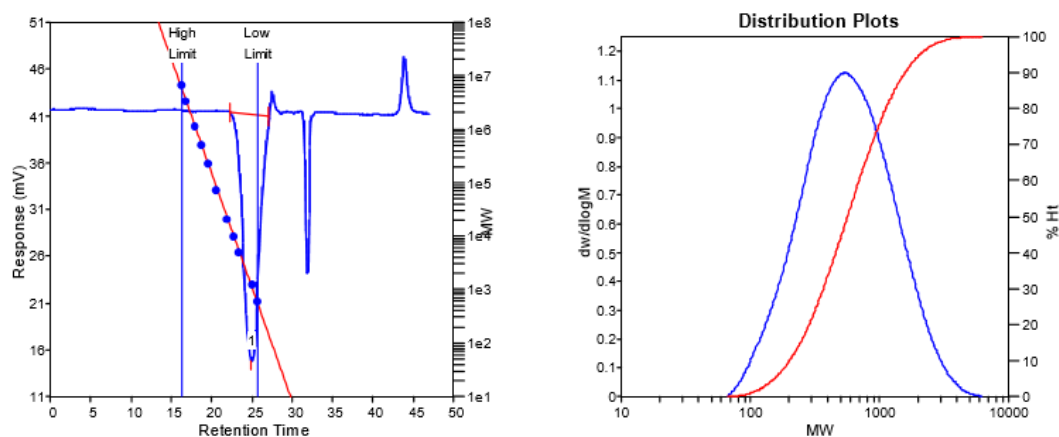

#### MW Averages

| Peak No | Mp  | Mn  | Mw  | Mz   | Mz+1 | Mv  | PD      |
|---------|-----|-----|-----|------|------|-----|---------|
| 1       | 546 | 417 | 754 | 1291 | 1948 | 696 | 1.80815 |

#### Processed Peaks

| Peak No | Name | Start RT (mins) | Max RT (mins) | End RT (mins) | Pk Height (mV) | % Height | Area (mV.secs) | % Area |
|---------|------|-----------------|---------------|---------------|----------------|----------|----------------|--------|
| 1       |      | 22.35           | 24.90         | 27.10         | -26.2586       | 100      | 3392.48        | 100    |

**Figure S71.** GPC trace of the polymer from table 3, entry 6.

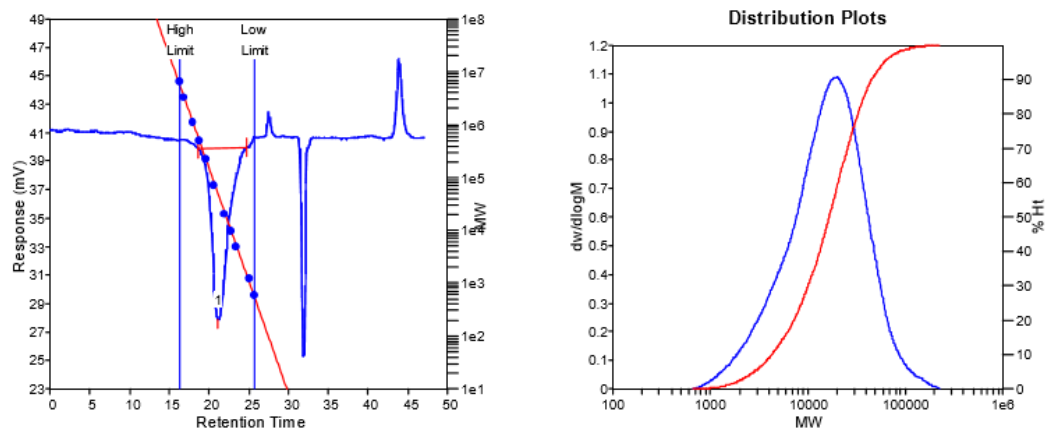

#### MW Averages

| Peak No | Mp    | Mn   | Mw    | Mz    | Mz+1  | Mv    | PD      |
|---------|-------|------|-------|-------|-------|-------|---------|
| 1       | 20348 | 9530 | 22114 | 41959 | 70253 | 20071 | 2.32046 |

#### Processed Peaks

| Peak No | Name | Start RT (mins) | Max RT (mins) | End RT (mins) | Pk Height (mV) | % Height | Area (mV.secs) | % Area |
|---------|------|-----------------|---------------|---------------|----------------|----------|----------------|--------|
| 1       |      | 18.57           | 21.10         | 24.70         | -12.0955       | 100      | 1614.05        | 100    |

**Figure S72.** GPC trace of the polymer from table 3, entry 7.

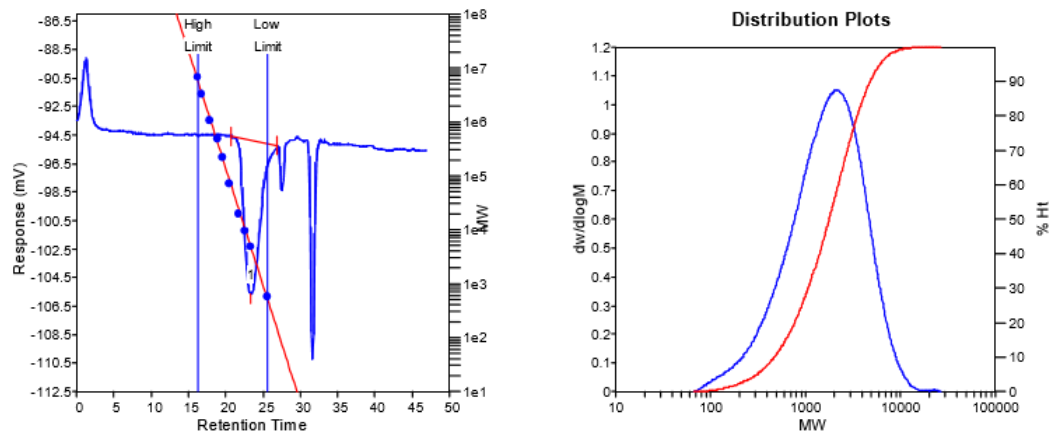

#### MW Averages

| Peak No | Mp   | Mn   | Mw   | Mz   | Mz+1 | Mv   | PD      |
|---------|------|------|------|------|------|------|---------|
| 1       | 2097 | 1006 | 2294 | 4014 | 6195 | 2099 | 2.28032 |

#### Processed Peaks

| Peak No | Name | Start RT (mins) | Max RT (mins) | End RT (mins) | Pk Height (mV) | % Height | Area (mV.secs) | % Area |
|---------|------|-----------------|---------------|---------------|----------------|----------|----------------|--------|
| 1       |      | 20.68           | 23.35         | 26.88         | -10.7928       | 100      | 1467.06        | 100    |

**Figure S73.** GPC trace of the polymer from table 3, entry 8.

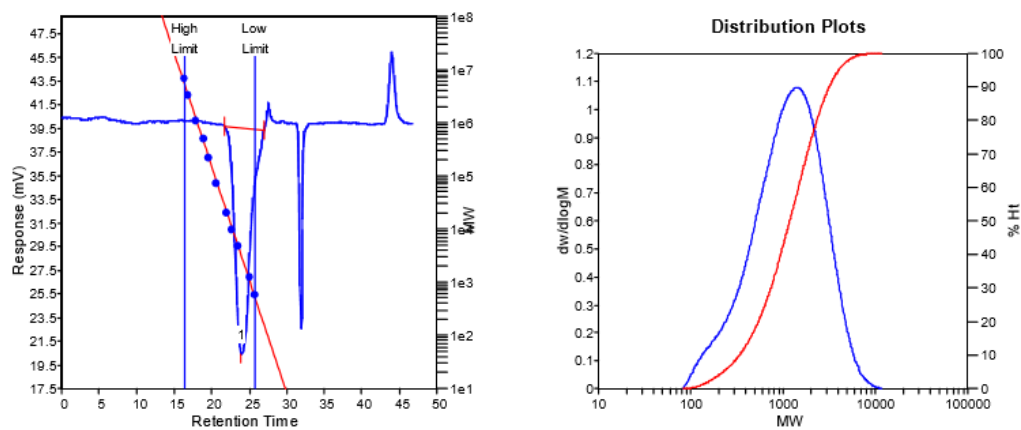

#### MW Averages

| Peak No | Mp   | Mn  | Mw   | Mz   | Mz+1 | Mv   | PD      |
|---------|------|-----|------|------|------|------|---------|
| 1       | 1439 | 734 | 1518 | 2538 | 3646 | 1399 | 2.06812 |

#### Processed Peaks

| Peak No | Name | Start RT (mins) | Max RT (mins) | End RT (mins) | Pk Height (mV) | % Height | Area (mV.secs) | % Area |
|---------|------|-----------------|---------------|---------------|----------------|----------|----------------|--------|
| 1       |      | 21.67           | 23.88         | 26.88         | -19.1096       | 100      | 2574.11        | 100    |

**Figure S74.** GPC trace of the polymer from table 3, entry 9.

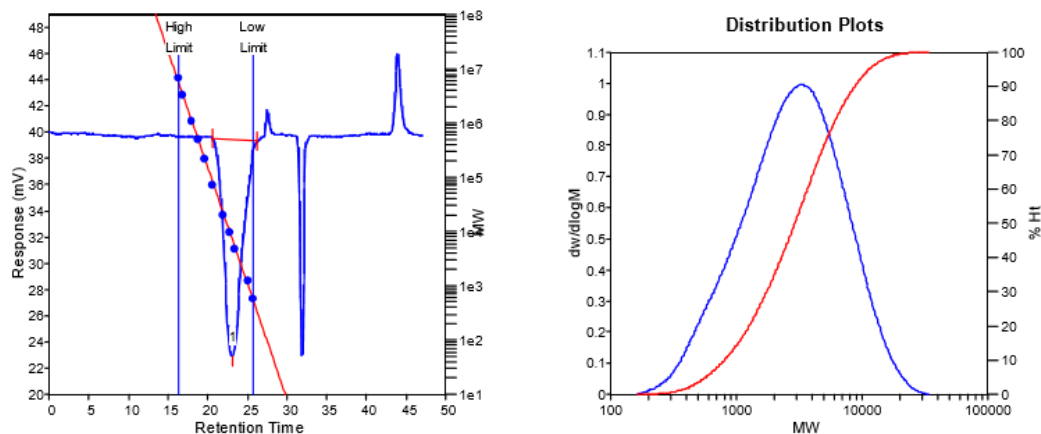

#### MW Averages

| Peak No | Mp   | Mn   | Mw   | Mz   | Mz+1  | Mv   | PD      |
|---------|------|------|------|------|-------|------|---------|
| 1       | 3231 | 1810 | 3995 | 7297 | 10981 | 3631 | 2.20718 |

#### Processed Peaks

| Peak No | Name | Start RT (mins) | Max RT (mins) | End RT (mins) | Pk Height (mV) | % Height | Area (mV.secs) | % Area |
|---------|------|-----------------|---------------|---------------|----------------|----------|----------------|--------|
| 1       |      | 20.55           | 23.03         | 26.18         | -16.5223       | 100      | 2411.15        | 100    |

**Figure S75.** GPC trace of the polymer from table 3, entry 10.

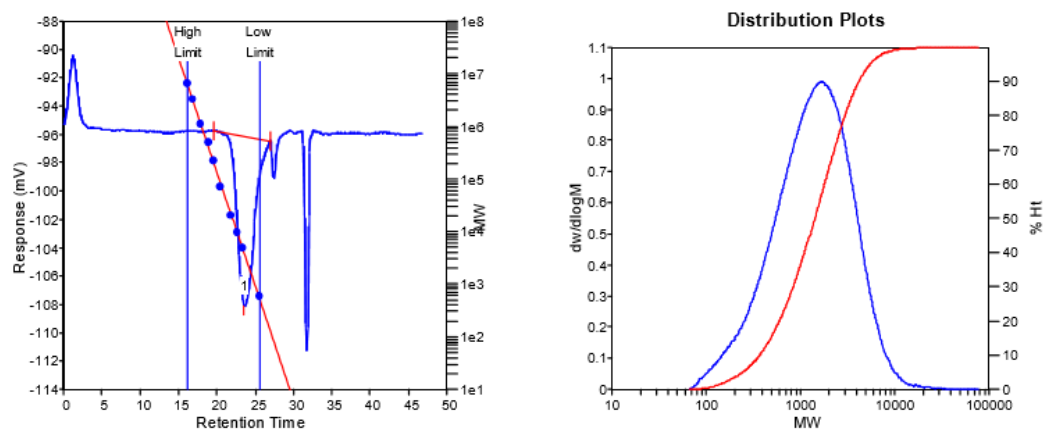

#### MW Averages

| Peak No | Mp   | Mn  | Mw   | Mz   | Mz+1 | Mv   | PD      |
|---------|------|-----|------|------|------|------|---------|
| 1       | 1700 | 816 | 1971 | 4041 | 8141 | 1774 | 2.41544 |

#### Processed Peaks

| Peak No | Name | Start RT (mins) | Max RT (mins) | End RT (mins) | Pk Height (mV) | % Height | Area (mV.secs) | % Area |
|---------|------|-----------------|---------------|---------------|----------------|----------|----------------|--------|
| 1       |      | 19.62           | 23.55         | 26.92         | -11.93         | 100      | 1722.09        | 100    |

**Figure S76.** GPC trace of the polymer from table 3, entry 11.

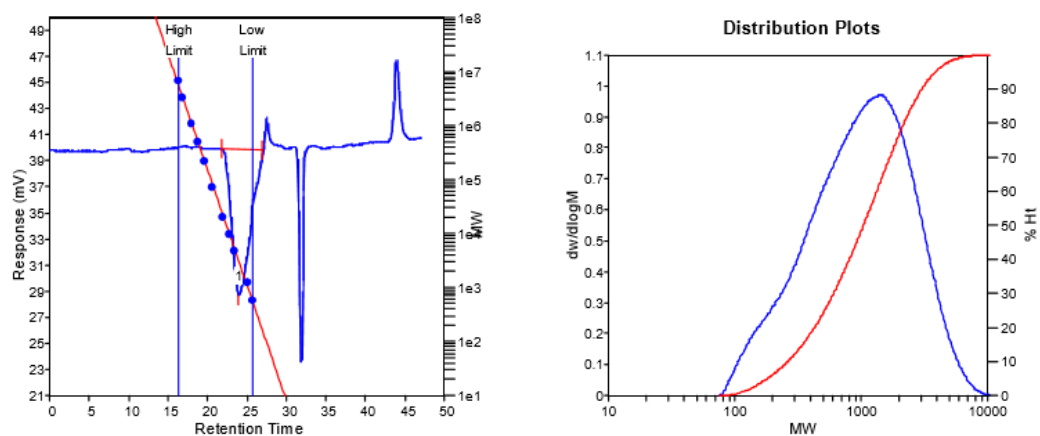

#### MW Averages

| Peak No | Mp   | Mn  | Mw   | Mz   | Mz+1 | Mv   | PD     |
|---------|------|-----|------|------|------|------|--------|
| 1       | 1462 | 614 | 1392 | 2459 | 3541 | 1267 | 2.2671 |

#### Processed Peaks

| Peak No | Name | Start RT (mins) | Max RT (mins) | End RT (mins) | Pk Height (mV) | % Height | Area (mV.secs) | % Area |
|---------|------|-----------------|---------------|---------------|----------------|----------|----------------|--------|
| 1       |      | 21.80           | 23.87         | 26.97         | -11.2056       | 100      | 1677.16        | 100    |

**Figure S77.** GPC trace of the polymer from table 3, entry 12.

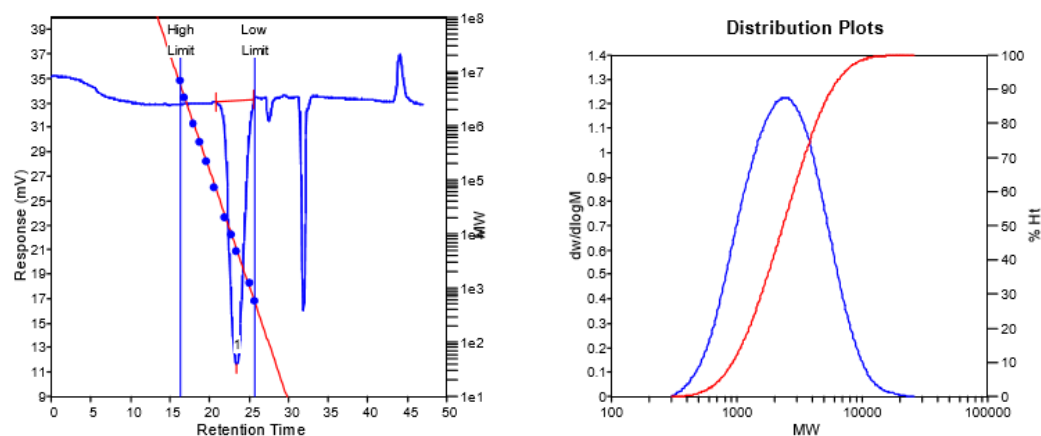

#### MW Averages

| Peak No | Mp   | Mn   | Mw   | Mz   | Mz+1 | Mv   | PD      |
|---------|------|------|------|------|------|------|---------|
| 1       | 2353 | 1816 | 2933 | 4585 | 6681 | 2749 | 1.61509 |

#### Processed Peaks

| Peak No | Name | Start RT (mins) | Max RT (mins) | End RT (mins) | Pk Height (mV) | % Height | Area (mV.secs) | % Area |
|---------|------|-----------------|---------------|---------------|----------------|----------|----------------|--------|
| 1       |      | 20.83           | 23.37         | 25.53         | -21.4777       | 100      | 2543.18        | 100    |

**Figure S78.** GPC trace of the polymer from table 4, entry 1.

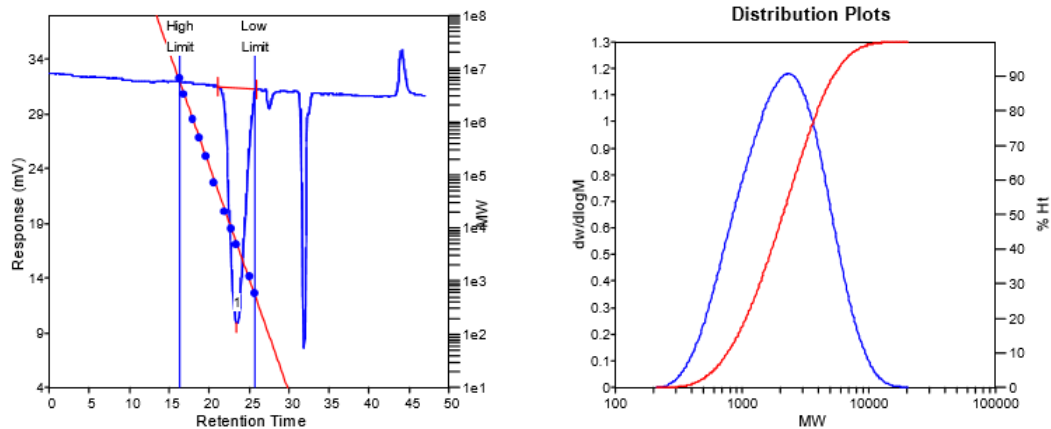

#### MW Averages

| Peak No | Mp   | Mn   | Mw   | Mz   | Mz+1 | Mv   | PD      |
|---------|------|------|------|------|------|------|---------|
| 1       | 2353 | 1564 | 2631 | 4110 | 5794 | 2460 | 1.68223 |

#### Processed Peaks

| Peak No | Name | Start RT (mins) | Max RT (mins) | End RT (mins) | Pk Height (mV) | % Height | Area (mV.secs) | % Area |
|---------|------|-----------------|---------------|---------------|----------------|----------|----------------|--------|
| 1       |      | 21.10           | 23.37         | 25.90         | -21.4915       | 100      | 2645.08        | 100    |

**Figure S79.** GPC trace of the polymer from table 4, entry 2.

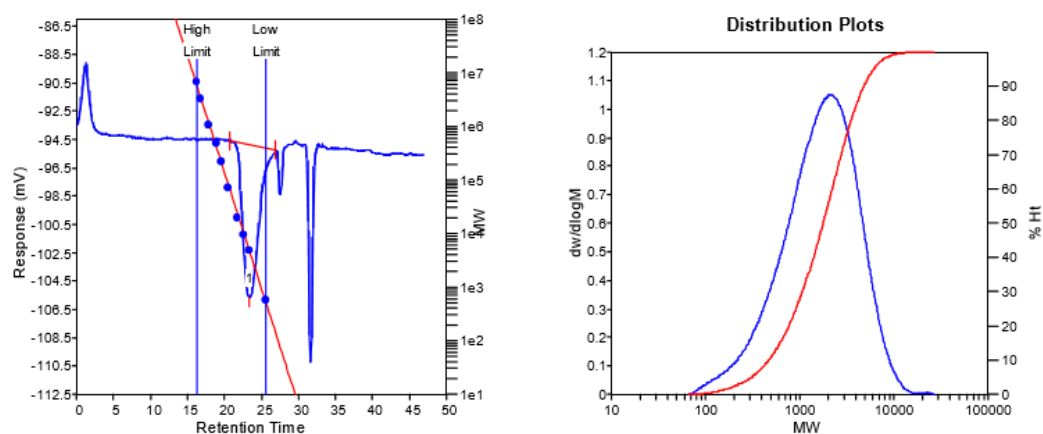

#### MW Averages

| Peak No | Mp   | Mn   | Mw   | Mz   | Mz+1 | Mv   | PD      |
|---------|------|------|------|------|------|------|---------|
| 1       | 2097 | 1006 | 2294 | 4014 | 6195 | 2099 | 2.28032 |

#### Processed Peaks

| Peak No | Name | Start RT (mins) | Max RT (mins) | End RT (mins) | Pk Height (mV) | % Height | Area (mV.secs) | % Area |
|---------|------|-----------------|---------------|---------------|----------------|----------|----------------|--------|
| 1       |      | 20.68           | 23.35         | 26.88         | -10.7928       | 100      | 1467.06        | 100    |

**Figure S80.** GPC trace of the polymer from table 4, entry 3.

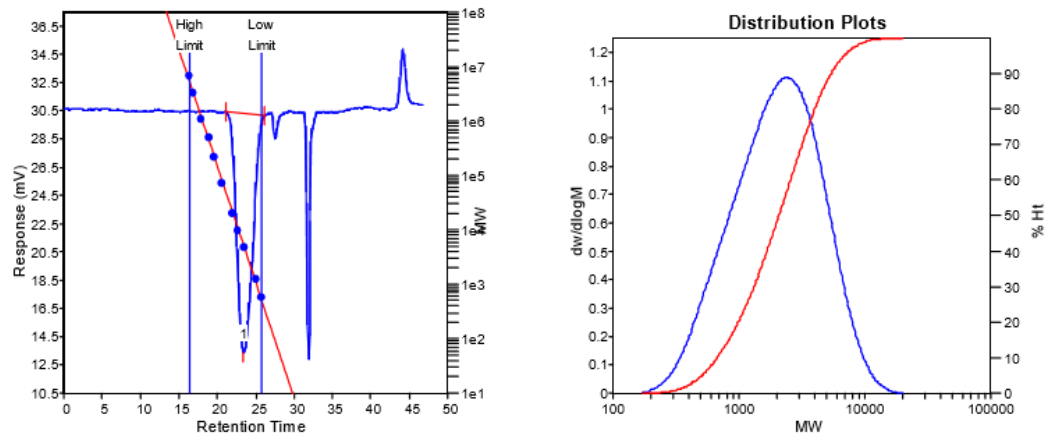

#### MW Averages

| Peak No | Mp   | Mn   | Mw   | Mz   | Mz+1 | Mv   | PD    |
|---------|------|------|------|------|------|------|-------|
| 1       | 2428 | 1439 | 2642 | 4279 | 6067 | 2451 | 1.836 |

#### Processed Peaks

| Peak No | Name | Start RT (mins) | Max RT (mins) | End RT (mins) | Pk Height (mV) | % Height | Area (mV.secs) | % Area |
|---------|------|-----------------|---------------|---------------|----------------|----------|----------------|--------|
| 1       |      | 21.12           | 23.33         | 26.13         | -16.9056       | 100      | 2210.08        | 100    |

**Figure S81.** GPC trace of the polymer from table 4, entry 4.



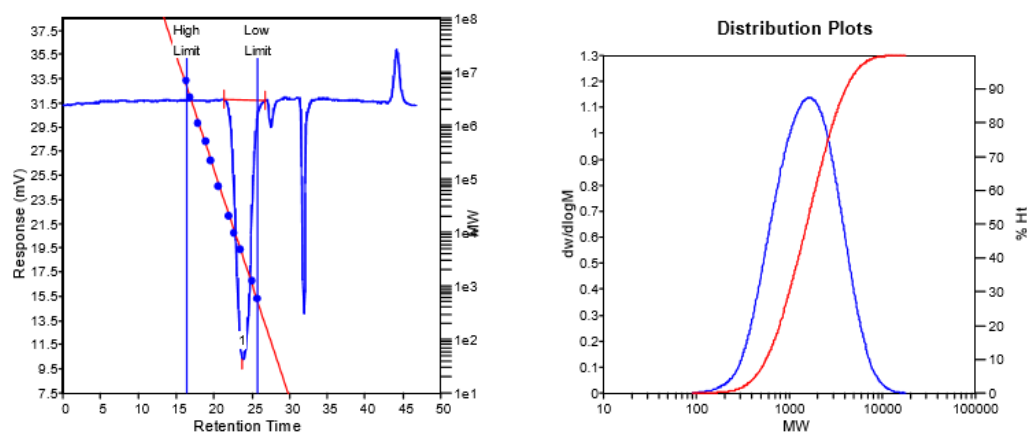

#### MW Averages

| Peak No | Mp   | Mn   | Mw   | Mz   | Mz+1 | Mv   | PD      |
|---------|------|------|------|------|------|------|---------|
| 1       | 1633 | 1125 | 1982 | 3238 | 4777 | 1842 | 1.76178 |

#### Processed Peaks

| Peak No | Name | Start RT (mins) | Max RT (mins) | End RT (mins) | Pk Height (mV) | % Height | Area (mV.secs) | % Area |
|---------|------|-----------------|---------------|---------------|----------------|----------|----------------|--------|
| 1       |      | 21.25           | 23.75         | 26.78         | -21.4651       | 100      | 2739.17        | 100    |

**Figure S82.** GPC trace of the polymer from table 4, entry 5.

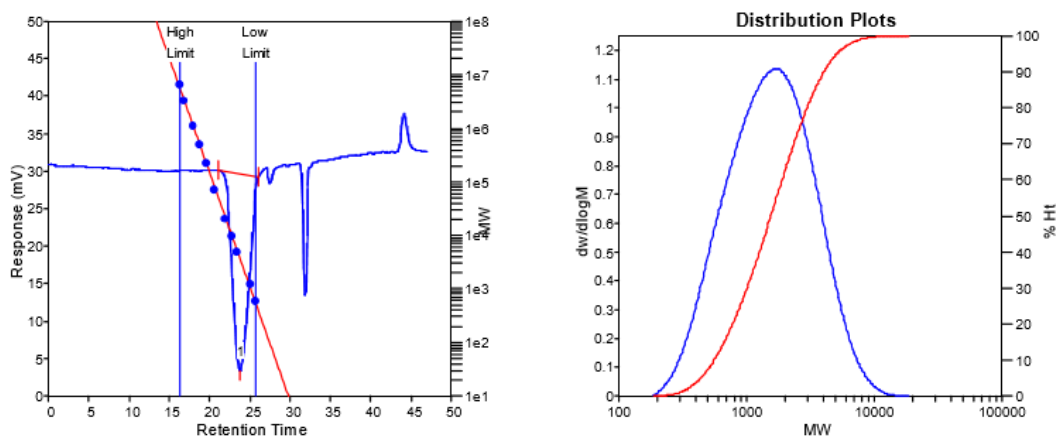

#### MW Averages

| Peak No | Mp   | Mn   | Mw   | Mz   | Mz+1 | Mv   | PD      |
|---------|------|------|------|------|------|------|---------|
| 1       | 1713 | 1152 | 1989 | 3220 | 4685 | 1851 | 1.72656 |

#### Processed Peaks

| Peak No | Name | Start RT (mins) | Max RT (mins) | End RT (mins) | Pk Height (mV) | % Height | Area (mV.secs) | % Area |
|---------|------|-----------------|---------------|---------------|----------------|----------|----------------|--------|
| 1       |      | 21.20           | 23.73         | 26.03         | -26.3435       | 100      | 3368.27        | 100    |

**Figure S83.** GPC trace of the polymer from table 4, entry 6.

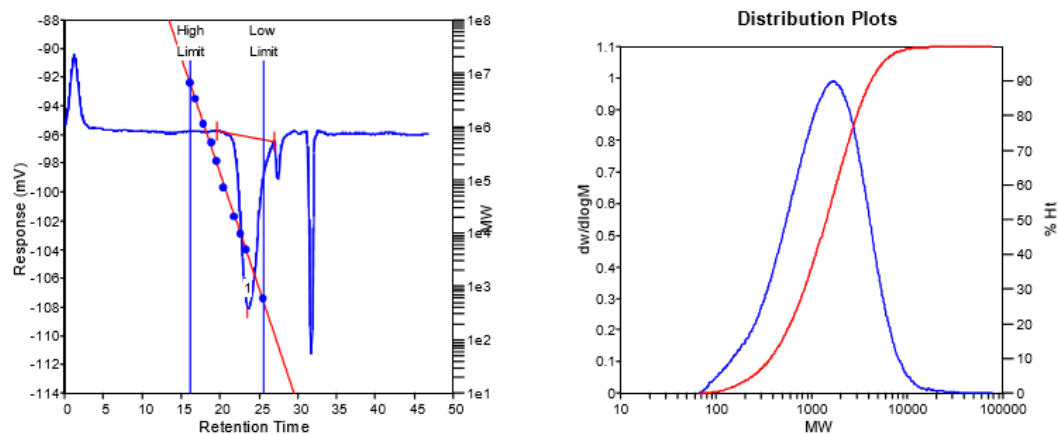

#### MW Averages

| Peak No | Mp   | Mn  | Mw   | Mz   | Mz+1 | Mv   | PD      |
|---------|------|-----|------|------|------|------|---------|
| 1       | 1700 | 816 | 1971 | 4041 | 8141 | 1774 | 2.41544 |

#### Processed Peaks

| Peak No | Name | Start RT (mins) | Max RT (mins) | End RT (mins) | Pk Height (mV) | % Height | Area (mV.secs) | % Area |
|---------|------|-----------------|---------------|---------------|----------------|----------|----------------|--------|
| 1       |      | 19.62           | 23.55         | 26.92         | -11.93         | 100      | 1722.09        | 100    |

**Figure S84.** GPC trace of the polymer from table 4, entry 7.

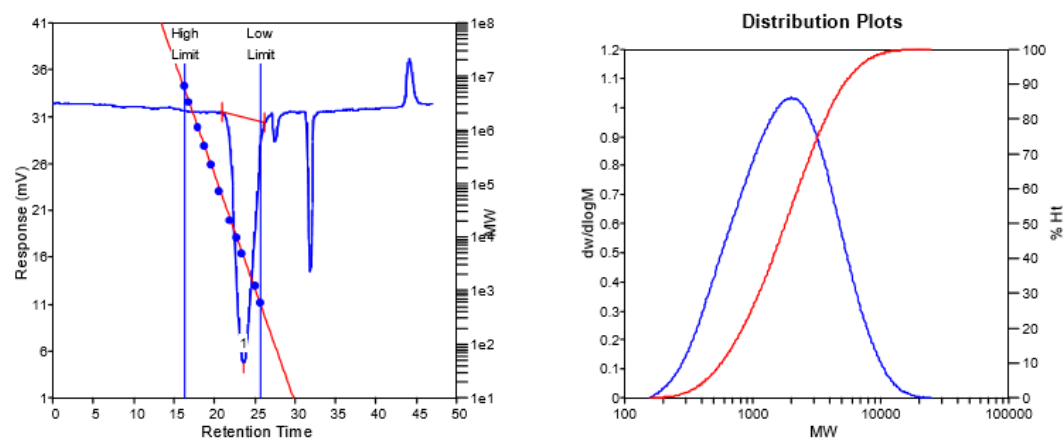

#### MW Averages

| Peak No | Mp   | Mn   | Mw   | Mz   | Mz+1 | Mv   | PD      |
|---------|------|------|------|------|------|------|---------|
| 1       | 2007 | 1237 | 2448 | 4353 | 6650 | 2242 | 1.97898 |

#### Processed Peaks

| Peak No | Name | Start RT (mins) | Max RT (mins) | End RT (mins) | Pk Height (mV) | % Height | Area (mV.secs) | % Area |
|---------|------|-----------------|---------------|---------------|----------------|----------|----------------|--------|
| 1       |      | 20.88           | 23.53         | 26.22         | -26.1838       | 100      | 3679.36        | 100    |

**Figure S85.** GPC trace of the polymer from table 4, entry 8.

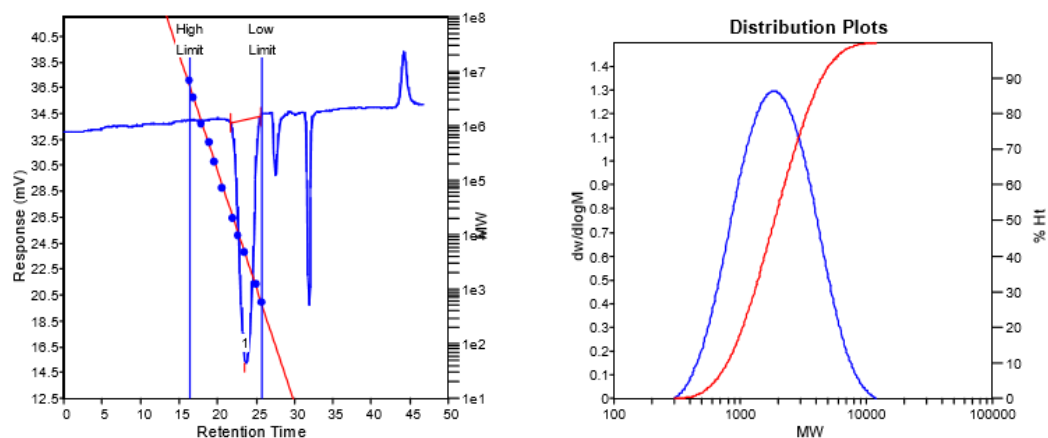

#### MW Averages

| Peak No | Mp   | Mn   | Mw   | Mz   | Mz+1 | Mv   | PD     |
|---------|------|------|------|------|------|------|--------|
| 1       | 1884 | 1511 | 2294 | 3358 | 4530 | 2168 | 1.5182 |

#### Processed Peaks

| Peak No | Name | Start RT (mins) | Max RT (mins) | End RT (mins) | Pk Height (mV) | % Height | Area (mV.secs) | % Area |
|---------|------|-----------------|---------------|---------------|----------------|----------|----------------|--------|
| 1       |      | 21.63           | 23.60         | 25.53         | -18.7691       | 100      | 2103.86        | 100    |

**Figure S86.** GPC trace of the polymer from table 5, entry 1.

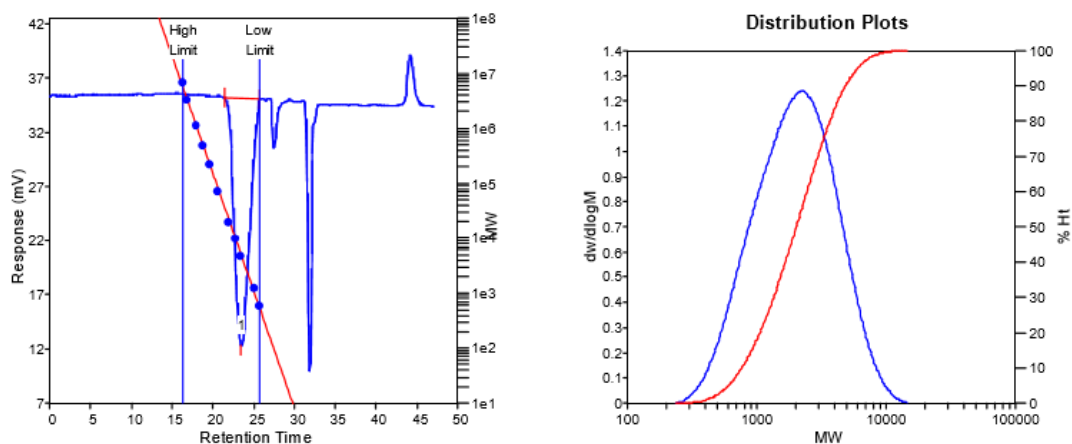

#### MW Averages

| Peak No | Mp   | Mn   | Mw   | Mz   | Mz+1 | Mv   | PD      |
|---------|------|------|------|------|------|------|---------|
| 1       | 2243 | 1536 | 2480 | 3739 | 5116 | 2331 | 1.61458 |

#### Processed Peaks

| Peak No | Name | Start RT (mins) | Max RT (mins) | End RT (mins) | Pk Height (mV) | % Height | Area (mV.secs) | % Area |
|---------|------|-----------------|---------------|---------------|----------------|----------|----------------|--------|
| 1       |      | 21.43           | 23.42         | 25.77         | -22.8021       | 100      | 2672.17        | 100    |

**Figure S87.** GPC trace of the polymer from table 5, entry 2.

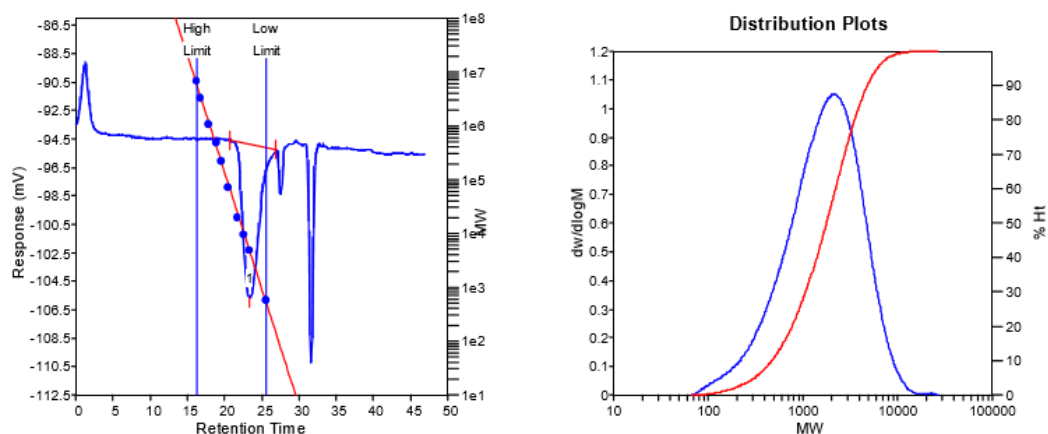

#### MW Averages

| Peak No | Mp   | Mn   | Mw   | Mz   | Mz+1 | Mv   | PD      |
|---------|------|------|------|------|------|------|---------|
| 1       | 2097 | 1006 | 2294 | 4014 | 6195 | 2099 | 2.28032 |

#### Processed Peaks

| Peak No | Name | Start RT (mins) | Max RT (mins) | End RT (mins) | Pk Height (mV) | % Height | Area (mV.secs) | % Area |
|---------|------|-----------------|---------------|---------------|----------------|----------|----------------|--------|
| 1       |      | 20.68           | 23.35         | 26.88         | -10.7928       | 100      | 1467.06        | 100    |

**Figure S88.** GPC trace of the polymer from table 5, entry 3.

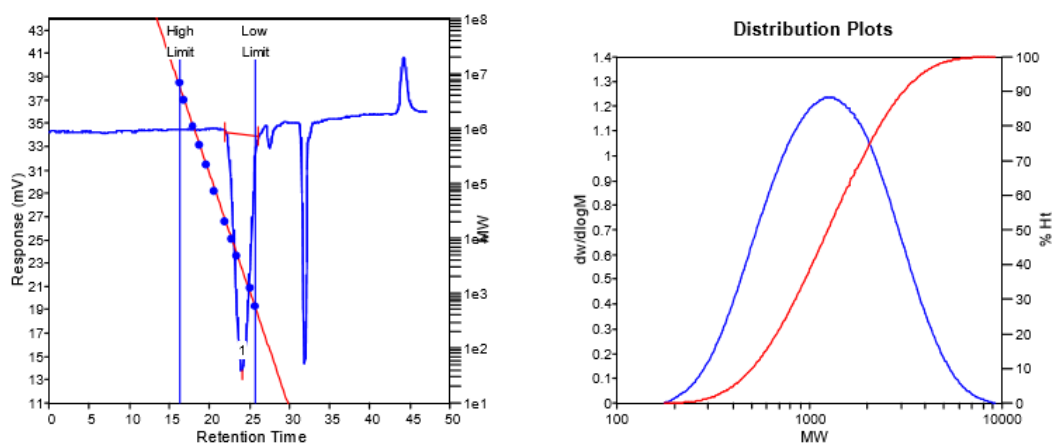

#### MW Averages

| Peak No | Mp   | Mn  | Mw   | Mz   | Mz+1 | Mv   | PD      |
|---------|------|-----|------|------|------|------|---------|
| 1       | 1267 | 986 | 1557 | 2347 | 3225 | 1465 | 1.57911 |

#### Processed Peaks

| Peak No | Name | Start RT (mins) | Max RT (mins) | End RT (mins) | Pk Height (mV) | % Height | Area (mV.secs) | % Area |
|---------|------|-----------------|---------------|---------------|----------------|----------|----------------|--------|
| 1       |      | 21.93           | 24.02         | 26.08         | -20.2254       | 100      | 2374.61        | 100    |

**Figure S89.** GPC trace of the polymer from table 5, entry 4.

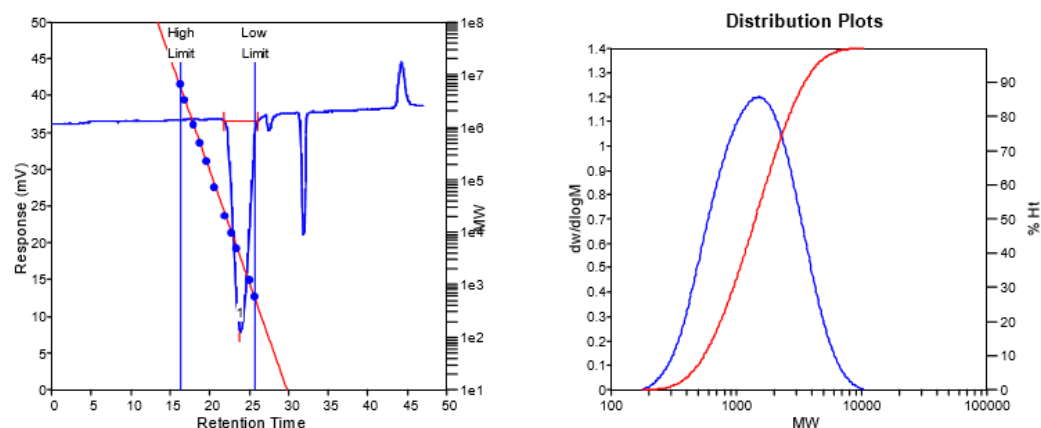

#### MW Averages

| Peak No | Mp   | Mn   | Mw   | Mz   | Mz+1 | Mv   | PD      |
|---------|------|------|------|------|------|------|---------|
| 1       | 1509 | 1091 | 1764 | 2691 | 3709 | 1656 | 1.61687 |

#### Processed Peaks

| Peak No | Name | Start RT (mins) | Max RT (mins) | End RT (mins) | Pk Height (mV) | % Height | Area (mV.secs) | % Area |
|---------|------|-----------------|---------------|---------------|----------------|----------|----------------|--------|
| 1       |      | 21.80           | 23.83         | 26.08         | -28.7064       | 100      | 3470.69        | 100    |

**Figure S90.** GPC trace of the polymer from table 5, entry 5.

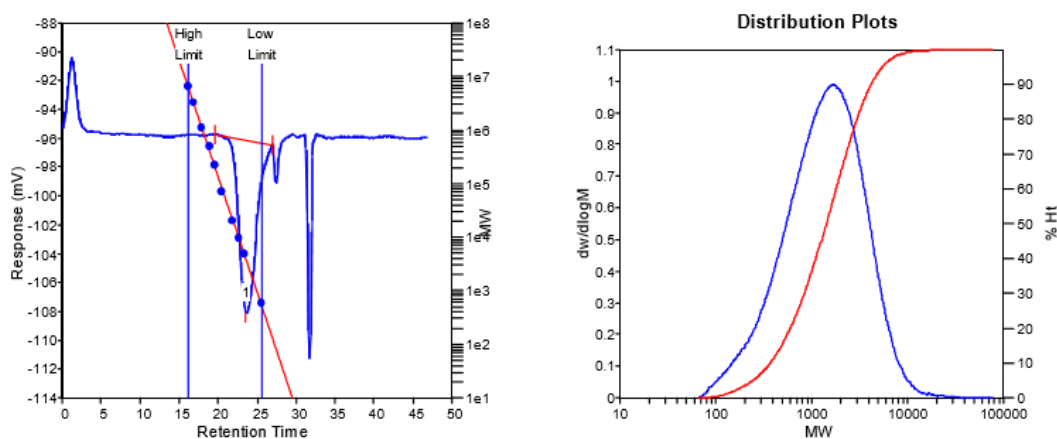

#### MW Averages

| Peak No | Mp   | Mn  | Mw   | Mz   | Mz+1 | Mv   | PD      |
|---------|------|-----|------|------|------|------|---------|
| 1       | 1700 | 816 | 1971 | 4041 | 8141 | 1774 | 2.41544 |

#### Processed Peaks

| Peak No | Name | Start RT (mins) | Max RT (mins) | End RT (mins) | Pk Height (mV) | % Height | Area (mV.secs) | % Area |
|---------|------|-----------------|---------------|---------------|----------------|----------|----------------|--------|
| 1       |      | 19.62           | 23.55         | 26.92         | -11.93         | 100      | 1722.09        | 100    |

**Figure S91.** GPC trace of the polymer from table 5, entry 6.

## 8. Crystallographic data of nickel complexes

**Table S1. Crystallographic data for Ni1-Ni4.**

|                                                                                                       | Ni1                                                                                           | Ni2                                                                                           | Ni3                                                                | Ni4                                                                                           |
|-------------------------------------------------------------------------------------------------------|-----------------------------------------------------------------------------------------------|-----------------------------------------------------------------------------------------------|--------------------------------------------------------------------|-----------------------------------------------------------------------------------------------|
| Formula                                                                                               | C <sub>78</sub> H <sub>64</sub> Br <sub>4</sub> N <sub>4</sub> Ni <sub>2</sub> O <sub>2</sub> | C <sub>82</sub> H <sub>56</sub> Br <sub>4</sub> N <sub>4</sub> Ni <sub>2</sub> O <sub>2</sub> | C <sub>40</sub> H <sub>34</sub> Br <sub>2</sub> N <sub>2</sub> NiO | C <sub>84</sub> H <sub>60</sub> Br <sub>4</sub> N <sub>4</sub> Ni <sub>2</sub> O <sub>2</sub> |
| Formula weight                                                                                        | 1526.39                                                                                       | 1566.36                                                                                       | 777.22                                                             | 1594.42                                                                                       |
| Crystal dimensions (mm <sup>3</sup> )                                                                 | 0.3×0.28×0.25                                                                                 | 0.3×0.27×0.23                                                                                 | 0.3×0.2×0.2                                                        | 0.3×0.05×0.05                                                                                 |
| Crystal system                                                                                        | triclinic                                                                                     | monoclinic                                                                                    | monoclinic                                                         | monoclinic                                                                                    |
| Space group                                                                                           | P -1                                                                                          | P 1 21/n 1                                                                                    | P 1 21/n 1                                                         | P 1 21/n 1                                                                                    |
| a (Å)                                                                                                 | 9.5838(6)                                                                                     | 11.6818(17)                                                                                   | 10.7994(7)                                                         | 10.9201(2)                                                                                    |
| b (Å)                                                                                                 | 13.0175(9)                                                                                    | 16.776(2)                                                                                     | 20.1287(14)                                                        | 22.8955(5)                                                                                    |
| c (Å)                                                                                                 | 13.8929(9)                                                                                    | 22.885(3)                                                                                     | 16.4169(11)                                                        | 14.1583(3)                                                                                    |
| α (°)                                                                                                 | 96.0490(10)                                                                                   | 90                                                                                            | 90                                                                 | 90                                                                                            |
| β (°)                                                                                                 | 91.8800(10)                                                                                   | 104.612(3)                                                                                    | 105.2580(10)                                                       | 109.8600(10)                                                                                  |
| γ (°)                                                                                                 | 107.2170(10)                                                                                  | 90                                                                                            | 90                                                                 | 90                                                                                            |
| Volume (Å <sup>3</sup> )                                                                              | 1642.61(19)                                                                                   | 4339.9(10)                                                                                    | 3442.9(4)                                                          | 3329.34(12)                                                                                   |
| Z                                                                                                     | 1                                                                                             | 2                                                                                             | 4                                                                  | 2                                                                                             |
| T (K)                                                                                                 | 173(2)                                                                                        | 173(2)                                                                                        | 173(2)                                                             | 173(2)                                                                                        |
| D <sub>calcd</sub> (g cm <sup>-3</sup> )                                                              | 1.543                                                                                         | 1.199                                                                                         | 1.499                                                              | 1.590                                                                                         |
| μ (mm <sup>-1</sup> )                                                                                 | 3.057                                                                                         | 2.316                                                                                         | 2.919                                                              | 3.941                                                                                         |
| F (000)                                                                                               | 772                                                                                           | 1576                                                                                          | 1576                                                               | 1608                                                                                          |
| Rflns. collected                                                                                      | 47034                                                                                         | 26588                                                                                         | 56091                                                              | 14606                                                                                         |
| Indep. rflns./R <sub>int</sub>                                                                        | 7505/0.0593                                                                                   | 7623/0.2275                                                                                   | 7885/0.0527                                                        | 4747/0.0667                                                                                   |
| Obsd. rflns. [ <i>I</i> <sub>0</sub> > 2σ( <i>I</i> <sub>0</sub> )]                                   | 6506                                                                                          | 5737                                                                                          | 6291                                                               | 3982                                                                                          |
| Data/restraints/parameter                                                                             | 7505/0/408                                                                                    | 7623 / 30 / 425                                                                               | 7885/0/417                                                         | 4747 / 0 / 436                                                                                |
| s                                                                                                     |                                                                                               |                                                                                               |                                                                    |                                                                                               |
| <i>R</i> <sub>1</sub> / <i>wR</i> <sub>2</sub> [ <i>I</i> <sub>0</sub> > 2σ( <i>I</i> <sub>0</sub> )] | 0.0284/0.0711                                                                                 | 0.0806/ 0.2202                                                                                | 0.0330/0.0703                                                      | 0.0485/0.1231                                                                                 |
| <i>R</i> <sub>1</sub> / <i>wR</i> <sub>2</sub> (all data)                                             | 0.0358/ 0.0756                                                                                | 0.1013/ 0.2325                                                                                | 0.0504/ 0.0775                                                     | 0.0596/ 0.1371                                                                                |
| GOF (on <i>F</i> <sup>2</sup> )                                                                       | 1.020                                                                                         | 1.014                                                                                         | 1.049                                                              | 1.075                                                                                         |
| Largest diff. peak and hole (e Å <sup>-3</sup> )                                                      | 0.556/−0.635                                                                                  | 1.380/−2.160                                                                                  | 0.554/−0.881                                                       | 0.842/−1.583                                                                                  |
| CCDC No.                                                                                              | 1947420                                                                                       | 1947422                                                                                       | 1947423                                                            | 1947428                                                                                       |

## 9. References

- (1) SMART, version 5.054; Bruker AXS Inc.: Madison, WI, **2000**.
- (2) SAINT and SADABS, version 6.22; Bruker AXS Inc.: Madison, WI, **2000**.
- (3) (a) O. V. Dolomanov, L. J. Bourhis, R. J. Gildea, J. A. K. Howard and H. Puschmann, *J. Appl. Crystallogr.*, 2009, **42**, 339-341. (b) G. M. Sheldrick, *SHELXL-2014, Program for refinement of crystal structures* University of Göttingen, Germany: 2014. (c) G. M. Sheldrick, *SHELXS-2014, Program for solution of crystal structures*. University of Göttingen, Germany: 2014.
- (4) Meiries, S.; Speck, K.; Cordes, D. B.; Slawin, A. M. Z.; Nolan, S. P., [Pd(IPr\*OMe)(acac)Cl]: Tuning the N-Heterocyclic Carbene in Catalytic C–N Bond Formation. *Organometallics* **2012**, 32 (1), 330-339.
- (5) Savka, R.; Foro, S.; Plenio, H. Pentiptycene-based Concave NHC–metal Complexes. *Dalton Transactions*, **2016**, 45, 11015-11024.
- (6) Zhang, L.; Hao, X.; Sun, W-H.; Redshaw, C. Synthesis, Characterization, and Ethylene Polymerization Behavior of 8-(Nitroarylamino)-5,6,7-trihydroquinolynickel Dichlorides: Influence of the Nitro Group and Impurities on Catalytic Activity. *ACS Catalysis* **2011**, 1 (10), 1213-1220.
- .
